# Supplementary material for: Synthesis of chiral sulfones via nickel-catalyzed asymmetric hydrogenation
Source: Royal Society of Chemistry journal article supplement (doi:10.1039/d4qo00145a), 2024-01-01
Supplement: d4qo00145a1.pdf [file d4qo00145a1.pdf]

*Supplementary Information for*

## **Synthesis of Chiral Sulfones *via* Nickel-Catalyzed Asymmetric Hydrogenation**

Guiying Xiao,<sup>a,b‡</sup> Xiaoxue Wu,<sup>a‡</sup> Zhangtao Zhou,<sup>\*c</sup> and Guohua Hou<sup>\*a</sup>

[a] Key Laboratory of Radiopharmaceuticals, College of Chemistry, Beijing Normal University, Beijing 100875, China

[b] Department of Chemistry and Chemical Engineering, Lyuliang University, Lyuliang 033001, China

[c] HwaGen Pharma., Shenzhen 518122, China

### **Contents:**

|                                                                                             |     |
|---------------------------------------------------------------------------------------------|-----|
| 1. Experimental Section.....                                                                | S2  |
| 2. General procedure for the synthesis of substrates.....                                   | S2  |
| 3. NMR and HRMS data of substrates.....                                                     | S5  |
| 4. General procedure for asymmetric hydrogenation of compound <b>1</b> and <b>3</b> .....   | S14 |
| 5. NMR, HPLC or SFC, optical rotation and HRMS data of compound <b>2</b> and <b>4</b> ..... | S16 |
| 6. References.....                                                                          | S28 |
| 7. NMR, SFC and HPLC spectra.....                                                           | S30 |

## 1. Experimental Section

**General Information:** All the air or moisture sensitive reactions and manipulations were performed by using standard Schlenk techniques and in a nitrogen-filled glovebox. THF, dioxane and toluene were distilled from sodium benzophenone ketyl. DCM and DCE was distilled from calcium hydride. Anhydrous MeOH was distilled from magnesium.  $^1\text{H}$  NMR and  $^{13}\text{C}$  NMR spectra were recorded on Bruker AV (400 MHz) spectrometers and JEOL JNM-ECX600P and JNM-ECS600 (400 MHz or 600 MHz) spectrometers. ( $\text{CDCl}_3$  was the solvent used for the NMR analysis, with TMS as the internal standard). Optical rotation was determined using Autopol III Automatic polarimeter (Rudolph research Analytical). HPLC analysis was conducted on Agilent 1260 series instrument. SFC analysis was conducted on Agilent 1260 series instrument. HRMS were recorded on a Waters LCT Premier XE mass spectrometer with TOF.

## 2. General procedure for the synthesis of substrates

### General Procedure 1<sup>1</sup>

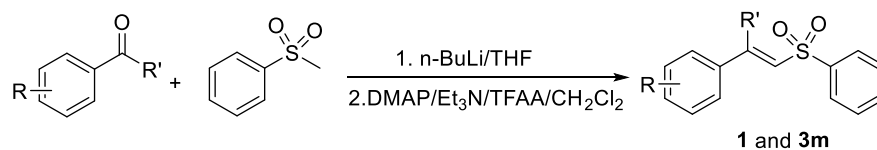

Methyl phenyl sulfon (1.00 eq.) was placed in an oven-dried 250 mL, three-neck round bottom flask. THF (6 mL/mmol) was added under nitrogen. The reaction mixture was cooled and n-BuLi (1.10 eq.) was added dropwise with stirring at  $-78\text{ }^\circ\text{C}$ . The solution was stirred for 30 min at  $-78\text{ }^\circ\text{C}$ . And then, the corresponding ketones (1.10 eq.) were added to the solution dropwise, maintained  $-78\text{ }^\circ\text{C}$ . The solution was stirred for 1 h until no starting material was detected by TLC. The reaction mixture was quenched with saturated aqueous  $\text{NH}_4\text{Cl}$  solution and extracted with ethyl acetate. The combined organic layers were washed with brine, dried over  $\text{Na}_2\text{SO}_4$ , and concentrated. The crude product and DMAP (0.10 eq.) was dissolved in DCM (30 mL), the reaction mixture was cooled,  $\text{Et}_3\text{N}$  (2.00 eq.) and TFAA (1.20 eq.) was added with stirring at  $0\text{ }^\circ\text{C}$ , then the reaction mixture was rise to room temperature after 30 min and stirred overnight. The reaction mixture was quenched with saturated aqueous  $\text{NH}_4\text{Cl}$  solution and

extracted with DCM. The combined organic layers were washed with brine, dried over  $\text{Na}_2\text{SO}_4$ , and concentrated. The residue was purification by chromatography on silica gel gave **1** and **3m**.

### General Procedure 2<sup>1</sup>

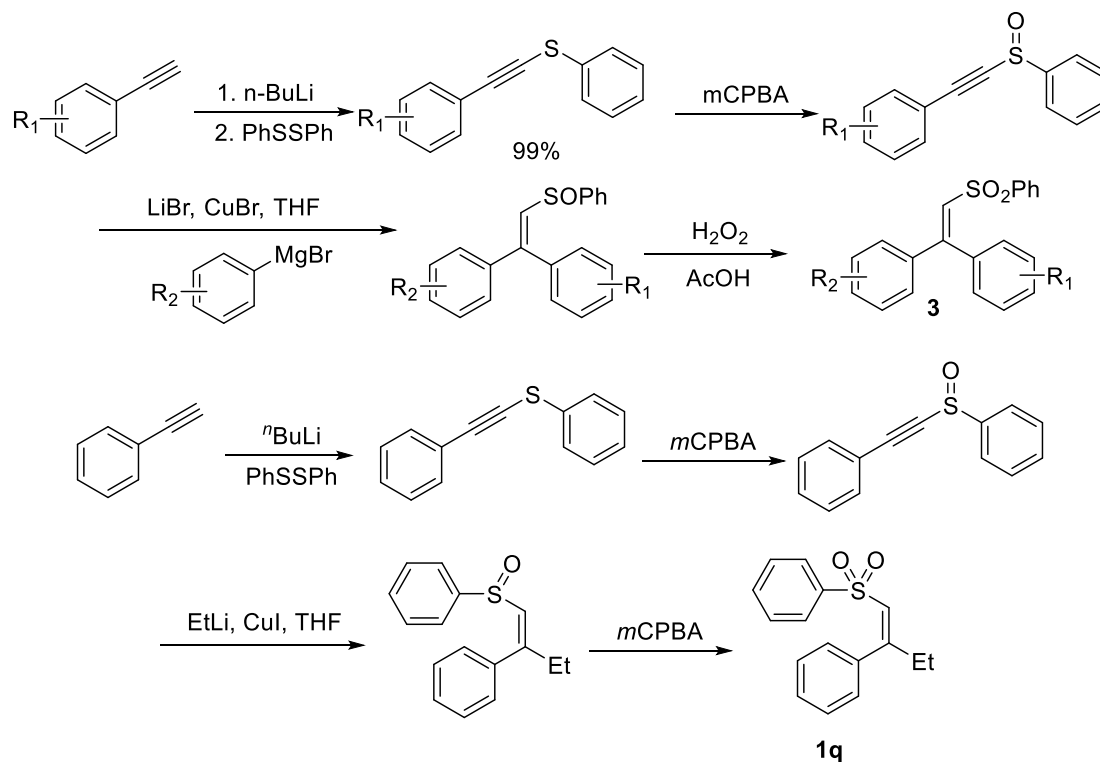

Phenylacetylene (1.00 eq.) was placed in an oven-dried 250 mL three-neck round bottom flask. THF (4 mL/mmol) was added under nitrogen. The reaction mixture was cooled and  $n\text{-BuLi}$  (1.10 eq.) was added dropwise with stirring at  $0\text{ }^\circ\text{C}$ . The solution was stirred at  $0\text{ }^\circ\text{C}$  for 1.5 h. And then, 1,2-diphenyldisulfane (1.00 eq.) was added to the solution in one portion, maintained  $0\text{ }^\circ\text{C}$  for 2 h. Then the solution was stirred at room temperature for 2 d. The reaction mixture was quenched with distilled water and extracted with ethyl acetate. The combined organic layers were washed three times with aqueous  $\text{NaOH}$  (0.1 M), and brine, dried over  $\text{Na}_2\text{SO}_4$ , and concentrated. The residue was purification by flash chromatography gave phenyl(phenylethynyl)sulfane. To a mixture of phenyl(phenylethynyl)sulfane (1.00 eq.) in DCM (20 mL/mmol) was added  $m\text{CPBA}$  (1.00 eq.) at  $0\text{ }^\circ\text{C}$  and the reaction mixture was stirred at  $0\text{ }^\circ\text{C}$  for 2 h. The solution was quenched with 30% aqueous  $\text{Na}_2\text{SO}_3$  and extracted with  $\text{CH}_2\text{Cl}_2$ , then

washed with saturated aqueous  $\text{NaHCO}_3$  and brine, and dried over  $\text{Na}_2\text{SO}_4$ , concentrated in vacuo to give crude product ((phenylethynyl)sulfinyl)benzene.

$\text{CuX}$  (1.28 eq.) was added to an oven-dried 250 mL three-neck round bottom flask under nitrogen, THF (4 mL/mmol) was added and the reaction mixture was cooled to  $-20\text{ }^\circ\text{C}$ . Then  $\text{LiBr}$  ( $\text{CuX} = \text{CuBr}$ , 1.28 eq.) in THF (0.8 mL/mmol) was added, followed by stirring for 10 min. The  $\text{RLi}$  (1.25 eq.,  $\text{CuI}$  used) or  $\text{RMgX}$  (1.25 eq.) ( $\text{CuBr/LiBr}$  used) was added dropwise at  $-20\text{ }^\circ\text{C}$ , followed by stirring for 15 min. After that, the solution was cooled to  $-78\text{ }^\circ\text{C}$  and a solution of crude product ((phenylethynyl)sulfinyl)benzene (1.00 eq.) in THF (4 mL/mmol) was added dropwise and stirred at  $-78\text{ }^\circ\text{C}$  for 1 h. The reaction was quenched with  $\text{MeOH}$ , and a saturated solution of  $\text{NH}_4\text{Cl}$  was added, then extracted three times with  $\text{DCM}$ . The combined organic extracts were washed with water, brine and then dried over  $\text{Na}_2\text{SO}_4$ , concentrated in vacuo to give crude product sulfoxide without purification.

The crude product sulfoxide (1.00 eq.) was suspended in glacial  $\text{AcOH}$  (1.11 mL/mmol) then, 30%  $\text{H}_2\text{O}_2$  (6.50 eq.) was slowly added. The mixture was heated to  $100\text{ }^\circ\text{C}$  and stirred for 1 h. The reaction mixture was cooled to room temperature, then saturated aqueous  $\text{NaHCO}_3$  (bring the  $\text{pH} \approx 7$ ) was added, and extracted with  $\text{DCM}$ . The organic extracts were washed with brine and dried over  $\text{Na}_2\text{SO}_4$  and concentrated in vacuo. The residue was purified by chromatography gave **3**.

The crude product sulfoxide (1.00 eq.) was dissolved in  $\text{DCM}$  (20 mL/mmol),  $\text{mCPBA}$  was added (1.00 eq.) at  $0\text{ }^\circ\text{C}$  and the reaction mixture was stirred at  $0\text{ }^\circ\text{C}$  for 2 h. The solution was quenched with 30% aqueous  $\text{Na}_2\text{SO}_3$  and extracted with  $\text{CH}_2\text{Cl}_2$ , then washed with saturated aqueous  $\text{NaHCO}_3$  and brine, and dried over  $\text{Na}_2\text{SO}_4$ , concentrated in vacuo. The residue was purified by chromatography gave **1q**.

### General Procedure 3<sup>2</sup>

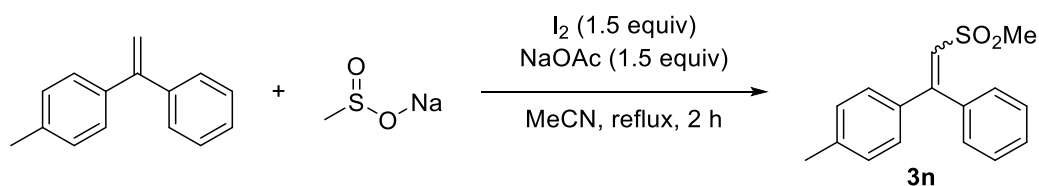

Add  $\text{I}_2$  (1.5 eq.) to a suspension mixture of styrene derivative (3.0 mmol), Sodium

methanesulfinate (3 eq.) and NaOAc (1.5eq.) in MeCN (15 mL). Stir the reaction mixture at refluxing temperature for 2 hours. Quench the reaction mixture by the addition of saturated aqueous sodium thiosulfate. Basify the mixture with saturated aqueous sodium hydrogen carbonate. Stir the mixture by extraction with ethyl acetate. Wash the combined organic extracts with water, brine. The organic extracts were washed with brine and dried over Na<sub>2</sub>SO<sub>4</sub> and concentrated in vacuo. The residue was purified by chromatography gave **3n**.

### 3. NMR and HRMS data of substrates

#### (*E*)-1-fluoro-3-(1-(phenylsulfonyl)prop-1-en-2-yl)benzene (**1a**)

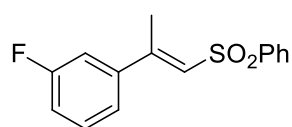

Purification by column chromatography (silica gel, PE:EA = 10:1, 5 × 20 cm) afforded the product as white solid; 1.60 g, yield: 58%; <sup>1</sup>H NMR (600 MHz, Chloroform-*d*) δ 8.00-7.95 (m, 2H), 7.66-7.62 (m, 1H), 7.59-7.55 (m, 2H), 7.35-7.31 (m, 1H), 7.19-7.16 (m, 1H), 7.10-7.06 (m, 2H), 6.63-6.58 (m, 1H), 2.53 (d, *J* = 1.2 Hz, 3H). MP: 49-51 °C (from ethyl acetate-hexane). The analytical data are consistent with the literature.<sup>1</sup>

#### (*E*)-1-fluoro-2-(1-(phenylsulfonyl)prop-1-en-2-yl)benzene (**1b**)

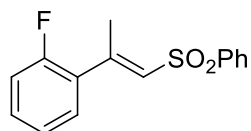

Purification by column chromatography (silica gel, PE:EA = 10:1, 5 × 20 cm) afforded the product as white solid; 1.61 g, yield: 61%; <sup>1</sup>H NMR (600 MHz, Chloroform-*d*) δ 8.01-7.96 (m, 2H), 7.66-7.62 (m, 1H), 7.59-7.55 (m, 2H), 7.35-7.30 (m, 1H), 7.25-7.21 (m, 1H), 7.15-7.11 (m, 1H), 7.08-7.04 (m, 1H), 6.55-6.51 (m, 1H), 2.51 (t, *J* = 1.4 Hz, 3H). MP: 65-68 °C (from ethyl acetate-hexane). The analytical data are consistent with the literature.<sup>1</sup>

#### (*E*)-1-fluoro-4-(1-(phenylsulfonyl)prop-1-en-2-yl)benzene (**1c**)

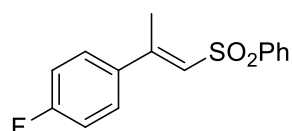

Purification by column chromatography (silica gel, PE:EA = 10:1, 5 × 20 cm) afforded the product as white solid; 1.98 g, yield: 72%; <sup>1</sup>H NMR (400 MHz, Chloroform-*d*) δ 8.01-7.94 (m, 2H), 7.66-7.60 (m, 1H), 7.59-7.54 (m, 2H), 7.41-7.36 (m, 2H), 7.08-7.02 (m, 2H), 6.57 (s, 1H), 2.52 (d, *J* = 1.2 Hz, 3H). MP: 54-56 °C (from ethyl acetate-hexane). The analytical data are consistent with the literature.<sup>1</sup>

**(E)-1-chloro-3-(1-(phenylsulfonyl)prop-1-en-2-yl)benzene (1d)**

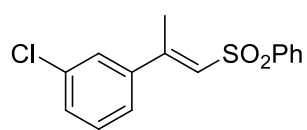

Purification by column chromatography (silica gel, PE:EA = 10:1, 5 × 20 cm) afforded the product as white solid; 1.54 g, yield: 53%; <sup>1</sup>H NMR (400 MHz, Chloroform-*d*) δ 8.02-7.93 (m, 2H), 7.67-7.61 (m, 1H), 7.60-7.55 (m, 2H), 7.37-7.26 (m, 4H), 6.59 (q, *J* = 1.2 Hz, 1H), 2.52 (d, *J* = 1.3 Hz, 3H). MP: 68-70 °C (from ethyl acetate-hexane). The analytical data are consistent with the literature.<sup>1</sup>

**(E)-1-chloro-4-(1-(phenylsulfonyl)prop-1-en-2-yl)benzene (1e)**

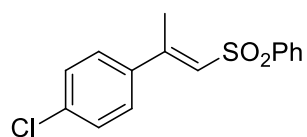

Purification by column chromatography (silica gel, PE:EA = 10:1, 5 × 20 cm) afforded the product as white solid; 1.25 g, yield: 43%; <sup>1</sup>H NMR (400 MHz, Chloroform-*d*) δ 7.99-7.95 (m, 2H), 7.66-7.61 (m, 1H), 7.56 (t, *J* = 7.5 Hz, 2H), 7.36-7.31 (m, 4H), 6.58 (d, *J* = 1.2 Hz, 1H), 2.51 (d, *J* = 0.9 Hz, 3H). MP: 99-101 °C (from ethyl acetate-hexane). The analytical data are consistent with the literature.<sup>3</sup>

**(E)-1-bromo-3-(1-(phenylsulfonyl)prop-1-en-2-yl)benzene (1f)**

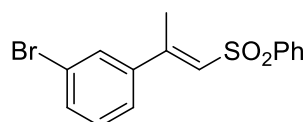

Purification by column chromatography (silica gel, PE:EA = 10:1, 5 × 20 cm) afforded the product as white solid; 1.74 g, yield: 52%; <sup>1</sup>H NMR (400 MHz, Chloroform-*d*) δ 8.00-7.95 (m, 2H), 7.67-7.62 (m, 1H), 7.60-7.55 (m, 2H), 7.52-7.48 (m, 2H), 7.33-7.29 (m, 1H), 7.26-7.20 (m, 1H), 6.61-6.54 (m, 1H), 2.52 (d, *J* = 1.3 Hz, 3H). MP: 80-82 °C. (from ethyl acetate-hexane). The analytical data are consistent with the literature.<sup>1</sup>

**(E)-1-bromo-4-(1-(phenylsulfonyl)prop-1-en-2-yl)benzene (1g)**

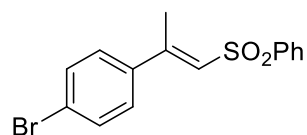

Purification by column chromatography (silica gel, PE:EA = 10:1, 5 × 20 cm) afforded the product as white solid; 1.47 g, yield: 44%; <sup>1</sup>H NMR (600 MHz, Chloroform-*d*) δ 8.00-7.93 (m, 2H), 7.64-7.60 (m, 1H), 7.58-7.53 (m, 2H), 7.50-7.44 (m, 2H), 7.27-7.22 (m, 2H), 6.60-6.55 (m, 1H), 2.50 (d, *J* = 1.1 Hz, 3H). <sup>13</sup>C NMR (100 MHz, Chloroform-*d*) δ = 152.0, 141.8, 138.9, 133.3, 131.8, 129.2, 127.8, 127.8, 127.2, 124.2, 17.0; MP: 113-115 °C (from ethyl acetate-hexane). TOF-HRMS Calculated for C<sub>15</sub>H<sub>14</sub>O<sub>2</sub>BrS ([M+H]<sup>+</sup>):

336.9892, found 336.9896, 338.9876.

*(E)*-1-methoxy-2-(1-(phenylsulfonyl)prop-1-en-2-yl)benzene (**1h**)

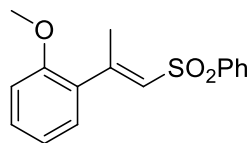

Purification by column chromatography (silica gel, PE:EA = 10:1, 5 × 20 cm) afforded the product as colorless solid; 1.76 g, yield: 45%; <sup>1</sup>H NMR (600 MHz, Chloroform-*d*) δ 8.00-7.97 (m, 2H), 7.63-7.61 (m, 1H) 7.56 (t, *J* = 7.6 Hz, 2H), 7.32-7.28 (m, 1H), 7.08 (dd, *J* = 7.5, 1.7 Hz, 1H), 6.92-6.89 (m, 1H), 6.87 (d, *J* = 8.3 Hz, 1H), 6.45-6.42 (m, 1H), 3.77 (s, 3H), 2.46 (d, *J* = 1.3 Hz, 3H). MP: 69-71 °C (from ethyl acetate-hexane). The analytical data are consistent with the literature.<sup>1</sup>

*(E)*-1-methoxy-3-(1-(phenylsulfonyl)prop-1-en-2-yl)benzene (**1i**)

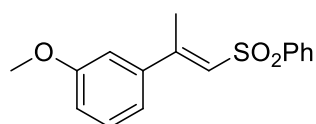

Purification by column chromatography (silica gel, PE:EA = 10:1, 5 × 20 cm) afforded the product as white solid; 1.64 g, yield: 64%; <sup>1</sup>H NMR (600 MHz, Chloroform-*d*) δ 7.97 (d, *J* = 7.8 Hz, 2H), 7.62 (t, *J* = 7.5 Hz, 1H), 7.56 (t, *J* = 7.7 Hz, 2H), 7.29-7.26 (m, 1H), 6.99-6.96 (m, 1H), 6.93-6.89 (m, 2H), 6.61 (s, 1H), 3.81 (s, 3H), 2.52 (s, 3H). MP: 65-67 °C (from ethyl acetate-hexane). The analytical data are consistent with the literature.<sup>4</sup>

*(E)*-1-methyl-4-(1-(phenylsulfonyl)prop-1-en-2-yl)benzene (**1j**)

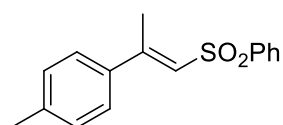

Purification by column chromatography (silica gel, PE:EA = 10:1, 5 × 20 cm) afforded the product as white solid; 1.27 g, yield: 47%; <sup>1</sup>H NMR (600 MHz, Chloroform-*d*) δ 8.00-7.95 (m, 2H), 7.61 (t, *J* = 7.4 Hz, 1H), 7.55 (t, *J* = 7.6 Hz, 2H), 7.30 (d, *J* = 8.2 Hz, 2H), 7.17 (d, *J* = 8.0 Hz, 2H), 6.63-6.58 (m, 1H), 2.53-2.50 (m, 3H), 2.35 (s, 3H). MP: 70-72°C; The analytical data are consistent with the literature.<sup>4</sup>

*(E)*-1-methyl-2-(1-(phenylsulfonyl)prop-1-en-2-yl)benzene (**1k**)

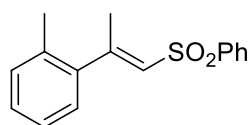

Purification by column chromatography (silica gel, PE:EA = 10:1, 5 × 20 cm) afforded the product as light yellow liquid; 1.76 g, yield: 65%; <sup>1</sup>H NMR (600 MHz, Chloroform-*d*) δ 7.98-7.96 (m, 2H), 7.63 (t, *J* = 7.0 Hz, 1H), 7.56 (t, *J* = 7.6 Hz, 2H), 7.21-7.18 (m, 1H), 7.16-7.12 (m,

2H), 6.99 (d,  $J = 7.8$  Hz, 1H), 6.28-6.23 (m, 1H), 2.42 (d,  $J = 1.3$  Hz, 3H), 2.17 (s, 3H).

The analytical data are consistent with the literature.<sup>1</sup>

*(E)*-((2-phenylprop-1-en-1-yl)sulfonyl)benzene (**1l**)

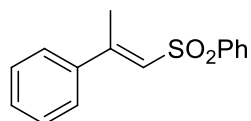

Purification by column chromatography (silica gel, PE:EA = 10:1, 5 × 20 cm) and recrystallization afforded the product as white solid; 1.75 g, yield: 68%; <sup>1</sup>H NMR (400 MHz, Chloroform-*d*) δ 8.01-7.95 (m, 2H), 7.65-7.60 (m, 1H), 7.59-7.54 (m, 2H), 7.41-7.35 (m, 5H), 6.61 (q,  $J = 1.2$  Hz, 1H), 2.55-2.51 (m, 3H). MP: 81-83 °C (from ethyl acetate-hexane). The analytical data are consistent with the literature.<sup>3</sup>

*(E)*-((2-phenylbut-1-en-1-yl)sulfonyl)benzene (**1m**)

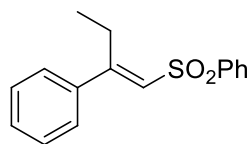

Purification by column chromatography (silica gel, PE:EA = 10:1, 5 × 20 cm) afforded the product as light yellow liquid; 0.87 g, yield: 32%; <sup>1</sup>H NMR (600 MHz, Chloroform-*d*) δ 8.00-7.97 (m, 2H), 7.64-7.61 (m, 1H), 7.57-7.54 (m, 2H), 7.38-7.34 (m, 5H), 6.48 (s, 1H), 3.07 (q,  $J = 7.5$  Hz, 2H), 0.97 (t,  $J = 7.5$  Hz, 3H). The analytical data are consistent with the literature.<sup>1</sup>

*(E)*-(1-cyclohexyl-2-(phenylsulfonyl)vinyl)benzene (**1n**)

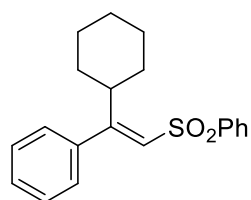

Purification by column chromatography (silica gel, PE:EA = 10:1, 5 × 20 cm) afforded the product as white solid; 1.50 g, yield: 46%; <sup>1</sup>H NMR (400 MHz, Chloroform-*d*) δ 7.46-7.41 (m, 3H), 7.31-7.24 (m, 3H), 7.22-7.18 (m, 2H), 6.90-6.87 (m, 2H), 6.48 (d,  $J = 1.2$  Hz, 1H), 2.20-2.09 (m, 1H), 1.77-1.70 (m, 4H), 1.65-1.60 (m, 1H), 1.21-1.06 (m, 5H). <sup>13</sup>C NMR (150 MHz, Chloroform-*d*) δ 163.5, 141.8, 136.4, 132.7, 128.6, 128.4, 128.0, 127.7, 127.6, 47.9, 31.3, 26.3, 25.9. MP: 81-83 °C (from ethyl acetate-hexane). TOF-HRMS Calculated for C<sub>20</sub>H<sub>23</sub>O<sub>2</sub>S ([M+H]<sup>+</sup>): 327.1413, found 327.1417.

*(E)*-1-(1-(phenylsulfonyl)prop-1-en-2-yl)naphthalene (**1o**)

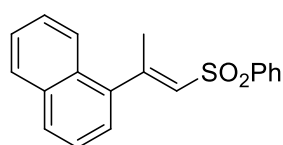

Purification by column chromatography (silica gel, PE:EA = 10:1, 5 × 20 cm) afforded the product as colorless solid; 2.09 g, yield: 68%; <sup>1</sup>H NMR (400 MHz, Chloroform-*d*) δ 8.07-8.01 (m,



2H), 7.87-7.79 (m, 2H), 7.71-7.65 (m, 2H), 7.61 (t,  $J = 7.4$  Hz, 2H), 7.52-7.45 (m, 2H), 7.42 (t,  $J = 7.7$  Hz, 1H), 7.23 (d,  $J = 7.0$  Hz, 1H), 6.56-6.43 (m, 1H), 2.62 (d,  $J = 1.2$  Hz, 3H). MP: 74-76 °C (from ethyl acetate-hexane). The analytical data are consistent with the literature.<sup>4</sup>

*(E)*-2-(1-(phenylsulfonyl)prop-1-en-2-yl)naphthalene (**1p**)

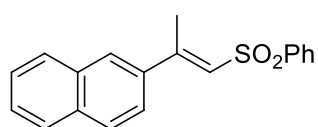

Purification by column chromatography (silica gel, PE:EA = 10:1, 5 × 20 cm) afforded the product as colorless solid; 2.20 g, yield: 72%; <sup>1</sup>H NMR (400 MHz, Chloroform-*d*) δ 8.03-7.98 (m, 2H), 7.87 (d,  $J = 1.5$  Hz, 1H), 7.84-7.80 (m, 3H), 7.65-7.61 (m, 1H), 7.59-7.54 (m, 2H), 7.52-7.46 (m, 3H), 6.75 (d,  $J = 1.2$  Hz, 1H), 2.63 (d,  $J = 1.2$  Hz, 3H). MP: 120-122 °C (from ethyl acetate-hexane). The analytical data are consistent with the literature.<sup>3</sup>

*(Z)*-((2-phenylbut-1-en-1-yl)sulfonyl)benzene (**1q**)

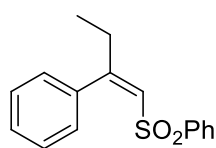

Purification by column chromatography (silica gel, PE:EA = 10:1, 5 × 20 cm) afforded the product as light yellow liquid; 1.30 g, yield: 48% (three steps); <sup>1</sup>H NMR (600 MHz, Chloroform-*d*) δ 7.46 (dd,  $J = 21.5, 7.8$  Hz, 3H), 7.33-7.27 (m, 3H), 7.26-7.21 (m, 2H), 6.98 (d,  $J = 7.2$  Hz, 2H), 6.51 (s, 1H), 2.39 (q,  $J = 7.3$  Hz, 2H), 1.01 (t,  $J = 7.3$  Hz, 3H). The analytical data are consistent with the literature.<sup>1</sup>

*(E)*-1-fluoro-4-((2-phenylprop-1-en-1-yl)sulfonyl)benzene (**1r**)

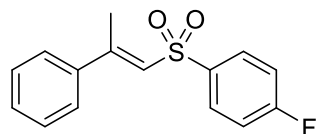

Purification by column chromatography (silica gel, PE:EA = 10:1, 5 × 20 cm) afforded the product as light yellow liquid; 1.35 g, yield: 49%; <sup>1</sup>H NMR (600 MHz, Chloroform-*d*) δ 8.01-7.97 (m, 2H), 7.40-7.35 (m, 5H), 7.25-7.21 (m, 2H), 6.60-6.57 (m, 1H), 2.54 (d,  $J = 1.1$  Hz, 3H). <sup>13</sup>C NMR (150 MHz, Chloroform-*d*) δ = 165.5 (d,  $J = 256.7$  Hz), 153.7, 140.0, 138.3, 130.1, 130.0, 128.8, 127.3, 126.3, 116.5, 17.2. TOF-HRMS Calculated for C<sub>15</sub>H<sub>14</sub>O<sub>2</sub>FS ([M+H]<sup>+</sup>): 277.0693, found 277.0699.

*(E)*-1-chloro-4-((2-phenylprop-1-en-1-yl)sulfonyl)benzene (**1s**)

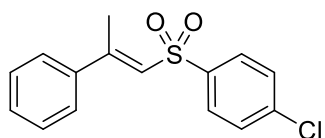

Purification by column chromatography (silica gel, PE:EA = 10:1, 5 × 22 cm) afforded the product as white solid; 1.52 g, yield: 52%; <sup>1</sup>H NMR (600 MHz, Chloroform-*d*) δ = 7.91 (d, *J* = 8.4 Hz, 2H), 7.53 (d, *J* = 8.4 Hz, 2H), 7.42-7.34 (m, 5H), 6.58 (s, 1H), 2.53 (s, 3H); MP: 79-81 °C (from ethyl acetate-hexane). The analytical data are consistent with the literature.<sup>5</sup>

**(E)-3-(1-(phenylsulfonyl)prop-1-en-2-yl)pyridine (1t)**

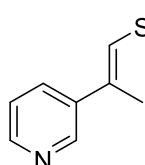

Purification by column chromatography (silica gel, PE:EA = 1:1, 5 × 20 cm) afforded the product as white solid; 0.99 g, yield: 38%; <sup>1</sup>H NMR (600 MHz, Chloroform-*d*) δ 8.63-8.62 (m, 1H), 8.60-8.59 (m, 1H), 7.97 (dt, *J* = 7.3, 1.4 Hz, 2H), 7.68 (ddd, *J* = 8.1, 2.5, 1.5 Hz, 1H), 7.65-7.62 (m, 1H), 7.58-7.55 (m, 2H), 7.31-7.28 (m, 1H), 6.61 (d, *J* = 1.3 Hz, 1H), 2.55 (d, *J* = 1.4 Hz, 3H). <sup>13</sup>C NMR (151 MHz, Chloroform-*d*) δ 150.8, 150.0, 147.3, 141.6, 135.8, 133.6, 133.5, 129.3, 128.9, 127.3, 123.4, 17.0. MP: 96-97 °C (from ethyl acetate-hexane). TOF-HRMS Calculated for C<sub>14</sub>H<sub>14</sub>NO<sub>2</sub>S ([M+H]<sup>+</sup>): 260.0740, found 260.0742.

**(E)-1-fluoro-3-(1-(phenylsulfonyl)prop-1-en-2-yl)benzene (3a)**

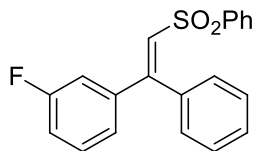

Purification by column chromatography (silica gel, PE:EA = 10:1, 5 × 20 cm) and recrystallization afforded the product as white solid; 0.95 g, yield: 28% (three steps); <sup>1</sup>H NMR (400 MHz, Chloroform-*d*) δ 7.59-7.54 (m, 2H), 7.51-7.46 (m, 1H), 7.39-7.32 (m, 3H), 7.31-7.26 (m, 3H), 7.09-7.03 (m, 3H), 7.03-7.00 (m, 2H), 6.89-6.84 (m, 1H). MP: 109-111 °C. (from ethyl acetate-hexane). The analytical data are consistent with the literature.<sup>1</sup>

**(Z)-1-fluoro-3-(1-(phenylsulfonyl)prop-1-en-2-yl)benzene (3a)**

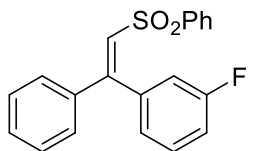

Purification by column chromatography (silica gel, PE:EA = 10:1, 5 × 20 cm) and recrystallization afforded the product as white solid; 0.91 g, yield: 27% (three steps); <sup>1</sup>H NMR (600 MHz, Chloroform-*d*) δ 7.63 (dd, *J* = 8.4, 1.2 Hz, 2H), 7.55-7.51 (m, 1H), 7.42-7.38 (m, 3H), 7.34-7.29 (m, 3H), 7.22-7.19 (m, 2H), 7.09-7.05 (m, 1H), 7.03 (s, 1H), 6.98-6.95 (m,

1H), 6.72-6.68 (m, 1H). MP: 81-83 °C (from ethyl acetate-hexane). The analytical data are consistent with the literature.<sup>1</sup>

*(E)*-1-fluoro-4-(1-phenyl-2-(phenylsulfonyl)vinyl)benzene (**3b**)

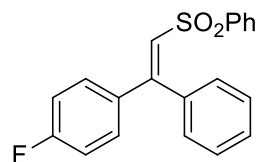

Purification by column chromatography (silica gel, PE:EA = 10:1, 5 × 22 cm) and recrystallization afforded the product as white solid; 1.08 g, yield: 32% (three steps); <sup>1</sup>H NMR (600 MHz, Chloroform-*d*) δ 7.57 (d, *J* = 7.9 Hz, 2H), 7.49 (t, *J* = 7.4 Hz, 1H), 7.39-7.33 (m, 3H), 7.29 (t, *J* = 7.6 Hz, 2H), 7.20 (dd, *J* = 8.6, 5.4 Hz, 2H), 7.06 (d, *J* = 7.5 Hz, 2H), 7.02-6.96 (m, 3H). MP: 121-123 °C (from ethyl acetate-hexane). The analytical data are consistent with the literature.<sup>1</sup>

*(E)*-1-chloro-4-(1-phenyl-2-(phenylsulfonyl)vinyl)benzene (**3c**)

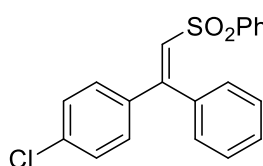

Purification by column chromatography (silica gel, PE:EA = 10:1, 5 × 20 cm) and recrystallization afforded the product as white solid; 1.09 g, Yield: 31% (three steps); <sup>1</sup>H NMR (600 MHz, Chloroform-*d*) δ 7.62-7.56 (m, 2H), 7.51-7.47 (m, 1H), 7.40-7.33 (m, 4H), 7.32-7.27 (m, 3H), 7.17-7.12 (m, 2H), 7.11-6.98 (m, 3H). MP: 96-98 °C (from ethyl acetate-hexane). The analytical data are consistent with the literature.<sup>1</sup>

*(E)*-1-methyl-2-(1-phenyl-2-(phenylsulfonyl)vinyl)benzene (**3d**)

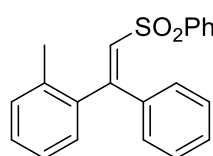

Purification by column chromatography (silica gel, PE:EA = 10:1, 5 × 20 cm) and recrystallization afforded the product as white solid; 0.96 g, yield: 29% (three steps); <sup>1</sup>H NMR (600 MHz, Chloroform-*d*) δ 7.76-7.68 (m, 2H), 7.56-7.49 (m, 1H), 7.38 (t, *J* = 7.9 Hz, 2H), 7.33-7.28 (m, 3H), 7.26-7.24 (m, 3H), 7.15 (dd, *J* = 14.7, 7.4 Hz, 2H), 7.06 (d, *J* = 7.6 Hz, 1H), 6.63 (d, *J* = 14.2 Hz, 1H), 2.04 (s, 3H). MP: 111-113 °C (from ethyl acetate-hexane). The analytical data are consistent with the literature.<sup>1</sup>

*(E)*-1-methyl-3-(1-phenyl-2-(phenylsulfonyl)vinyl)benzene (**3e**)

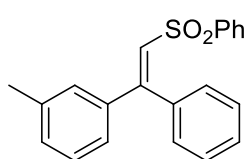

Purification by column chromatography (silica gel, PE:EA = 10:1, 5 × 20 cm) and recrystallization afforded the product as yellow solid; 0.90 g, yield: 27% (three steps); <sup>1</sup>H NMR (600 MHz,

Chloroform-*d*)  $\delta$  7.60-7.55 (m, 2H), 7.50-7.46 (m, 1H), 7.38-7.32 (m, 3H), 7.28 (d,  $J = 7.8$  Hz, 2H), 7.20-7.17 (m, 2H), 7.09-7.05 (m, 2H), 7.04 (s, 1H), 7.01 (d,  $J = 1.9$  Hz, 1H), 6.99-6.97 (m, 1H), 2.30 (s, 3H). MP: 119-121 °C (from ethyl acetate-hexane). The analytical data are consistent with the literature.<sup>1</sup>

(*E*)-1-methyl-4-(1-phenyl-2-(phenylsulfonyl)vinyl)benzene (**3f**)

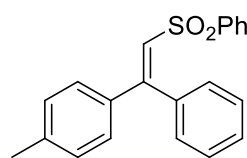

Purification by column chromatography (silica gel, PE:EA = 10:1, 5 × 20 cm) and recrystallization afforded the product as white solid; 0.83 g, yield: 25% (three steps); <sup>1</sup>H NMR (600 MHz, Chloroform-*d*)  $\delta$  7.58-7.55 (m, 2H), 7.47 (t,  $J = 7.9$  Hz, 1H), 7.40-7.31 (m, 5H), 7.29 (s, 2H), 7.10 (s, 4H), 7.07-7.04 (m, 2H), 7.00 (d,  $J = 3.9$  Hz, 1H), 2.34 (s, 3H). MP: 113-115 °C (from ethyl acetate-hexane). The analytical data are consistent with the literature.<sup>1</sup>

(*E*)-1,2-dichloro-4-(1-phenyl-2-(phenylsulfonyl)vinyl)benzene (**3g**)

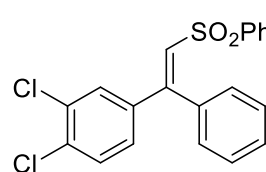

Purification by column chromatography (silica gel, PE:EA = 10:1, 5 × 20 cm) and recrystallization afforded the product as white solid; 1.47 g, yield: 38% (three steps); <sup>1</sup>H NMR (600 MHz, Chloroform-*d*)  $\delta$  7.64 (d,  $J = 8.1$  Hz, 2H), 7.57 (t,  $J = 7.4$  Hz, 1H), 7.48-7.39 (m, 4H), 7.34 (t,  $J = 7.4$  Hz, 2H), 7.20 (d,  $J = 7.6$  Hz, 2H), 7.14-6.98 (m, 3H). MP: 108-110 °C (from ethyl acetate-hexane). The analytical data are consistent with the literature.<sup>1</sup>

(*E*)-1,3-dimethyl-5-(1-phenyl-2-(phenylsulfonyl)vinyl)benzene (**3h**)

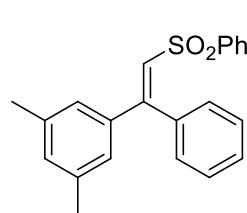

Purification by column chromatography (silica gel, PE:EA = 10:1, 5 × 20 cm) and recrystallization afforded the product as white solid; 0.87 g, yield: 25% (three steps); <sup>1</sup>H NMR (600 MHz, Chloroform-*d*)  $\delta$  7.64-7.55 (m, 2H), 7.47 (t,  $J = 7.4$  Hz, 1H), 7.40-7.32 (m, 3H), 7.32-7.27 (m, 2H), 7.13-6.97 (m, 4H), 6.81 (s, 2H), 2.25 (s, 6H). MP: 123-125 °C (from ethyl acetate-hexane). The analytical data are consistent with the literature.<sup>1</sup>

(*E*)-1-chloro-4-(2-(phenylsulfonyl)-1-(*p*-tolyl)vinyl)benzene (**3i**)

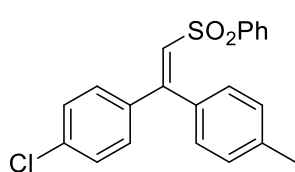

Purification by column chromatography (silica gel, PE:EA = 10:1, 5 × 20 cm) and recrystallization afforded the product as white solid; 0.85 g, yield: 23% (three steps); <sup>1</sup>H NMR (600 MHz, Chloroform-*d*) δ 7.61 (dd, *J* = 8.4, 1.2 Hz, 2H), 7.52-7.49 (m, 1H), 7.38-7.35 (m, 2H), 7.28-7.26 (m, 2H), 7.15-7.13 (m, 2H), 7.11 (d, *J* = 7.8 Hz, 2H), 6.99-6.96 (m, 2H), 6.93 (s, 1H), 2.39 (s, 3H). <sup>13</sup>C NMR (100 MHz, Chloroform-*d*) δ 153.5, 140.9, 138.8, 137.4, 136.0, 132.4, 131.7, 129.3, 129.1, 128.3, 128.2, 127.2, 20.9. MP: 76-78 °C (from ethyl acetate-hexane). TOF-HRMS Calculated for C<sub>21</sub>H<sub>18</sub>O<sub>2</sub>ClS ([M+H]<sup>+</sup>): 369.0711, found 369.0715.

**(E)-1-fluoro-4-(2-(phenylsulfonyl)-1-(*p*-tolyl)vinyl)benzene (3j)**

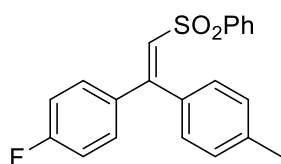

Purification by column chromatography (silica gel, PE:EA = 10:1, 5 × 20 cm) and recrystallization afforded the product as light yellow solid; 1.09 g, yield: 31% (three steps); <sup>1</sup>H NMR (400 MHz, Chloroform-*d*) δ 7.64-7.58 (m, 2H), 7.53-7.47 (m, 1H), 7.39-7.34 (m, 2H), 7.22-7.17 (m, 2H), 7.13-7.08 (m, 2H), 7.01-6.95 (m, 4H), 6.91 (s, 1H), 2.39 (s, 3H). MP: 110-112 °C (from ethyl acetate-hexane). The analytical data are consistent with the literature.<sup>1</sup>

**(E)-1-methyl-3-(2-(phenylsulfonyl)-1-(*p*-tolyl)vinyl)benzene (3k)**

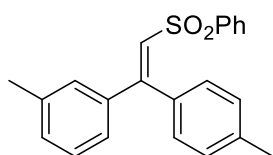

Purification by column chromatography (silica gel, PE : EA = 15 : 1, 5 × 20 cm) and recrystallization afforded the product as white solid; Yield: 32% (three steps); <sup>1</sup>H NMR (600 MHz, Chloroform-*d*) δ 7.61 (dd, *J* = 8.4, 1.2 Hz, 2H), 7.51-7.47 (m, 1H), 7.37-7.33 (m, 2H), 7.18 (d, *J* = 4.8 Hz, 2H), 7.09 (d, *J* = 7.8 Hz, 2H), 7.03 (s, 1H), 7.00-6.96 (m, 3H), 6.94 (s, 1H), 2.39 (s, 3H), 2.30 (s, 3H). MP: 127-129 °C (from ethyl acetate-hexane). The analytical data are consistent with the literature.<sup>1</sup>

**(Z)-1-fluoro-3-(2-(phenylsulfonyl)-1-(*m*-tolyl)vinyl)benzene (3l)**

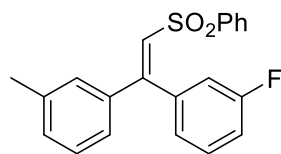

Purification by column chromatography (silica gel, PE:EA = 10:1, 5 × 20 cm) and recrystallization afforded the product as white solid; 0.81 g, yield: 27% (three steps); <sup>1</sup>H NMR (600

MHz, Chloroform-*d*)  $\delta$  7.66-7.61 (m, 2H), 7.55-7.51 (m, 1H), 7.39 (t,  $J = 6.3$  Hz, 2H), 7.32-7.27 (m, 1H), 7.24-7.18 (m, 2H), 7.09-7.02 (m, 3H), 7.00-6.92 (m, 2H), 6.76-6.65 (m, 1H), 2.31 (s, 3H). MP: 77-79 °C (from ethyl acetate-hexane). The analytical data are consistent with the literature.<sup>1</sup>

*(E)*-3-(1-phenyl-2-(phenylsulfonyl)vinyl)pyridine (**3m**)

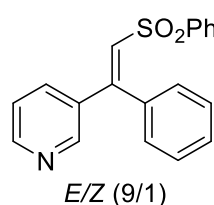

Purification by column chromatography (silica gel, PE:EA = 1:1, 5  $\times$  20 cm) afforded the product as white solid; 1.81 g, yield: 56%; <sup>1</sup>H NMR (600 MHz, Chloroform-*d*)  $\delta$  8.85 (dd,  $J = 4.9, 1.8$  Hz, 1H), 8.49 (d,  $J = 2.2$  Hz, 1H), 7.87-7.85 (m, 2H), 7.78-7.74 (m, 2H), 7.66-7.60 (m, 3H), 7.57-7.50 (m, 3H), 7.42-7.40 (m, 2H), 7.31 (s, 1H). <sup>13</sup>C NMR (151 MHz, Chloroform-*d*)  $\delta$  151.5, 150.1, 149.6, 141.4, 138.4, 137.4, 133.5, 130.9, 130.1, 129.2, 129.0, 128.2, 127.6, 122.9. MP: 90-92 °C (from ethyl acetate-hexane). TOF-HRMS Calculated for C<sub>19</sub>H<sub>16</sub>NO<sub>2</sub>S ([M+H]<sup>+</sup>): 322.0896, found 322.0902.

1-Methyl-4-(2-(methylsulfonyl)-1-phenylvinyl)benzene (**3n**)

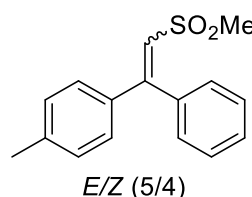

Purification by column chromatography (silica gel, PE:EA = 5:1, 5  $\times$  20 cm) afforded the product as white solid; 0.65 g, yield: 79%; <sup>1</sup>H NMR (600 MHz, Chloroform-*d*)  $\delta$  7.46-7.44 (m, 2H), 7.38-7.36 (m, 2H), 7.29-7.28 (m, 2H), 7.26-7.25 (m, 1H), 7.17 (s, 2H), 6.84 (s, 1H), 2.66 (s, 3H), 2.37 (s, 3H). MP: 104-106 °C (from ethyl acetate-hexane). The analytical data are consistent with the literature.<sup>6</sup>

#### 4. General procedure for asymmetric hydrogenation of **1** and **3**.

A stock solution was made by mixing 1.0 mol % Ni(OAc)<sub>2</sub>·H<sub>2</sub>O with 1.1 mol % (*S,S*)-Ph-BPE in solvent (CF<sub>3</sub>CH<sub>2</sub>OH) at room temperature for 12 hours in a nitrogen-filled glovebox. An aliquot of the catalyst solution (1.0 mL, 0.00125 mmol) was transferred by syringe into the vials charged with different substrates (0.125 mmol for each) and added additive HOAc. The vials were subsequently transferred into which hydrogen gas was charged. The reaction was then stirred under H<sub>2</sub> (50 atm) at 80 °C for 24 h. The hydrogen gas was released slowly and carefully. The solution was passed through a short column of silica gel to remove the metal complex. The conversion of products

were determined by GC or  $^1\text{H}$  NMR analysis. The crude products were concentrated and purified by flash column chromatography and the ee values were determined by HPLC, SFC analysis on a chiral stationary phase.

**Gram scale experiment:** A stock solution was made by mixing 1 mol %  $\text{Ni}(\text{OAc})_2 \cdot \text{H}_2\text{O}$  with 1.1 mol % (*S,S*)-Ph-BPE in solvent ( $\text{CF}_3\text{CH}_2\text{OH}$ ) at room temperature for 24 hours in a nitrogen-filled glovebox. An aliquot of the catalyst solution (5.0 mL, 0.00125 mmol) was transferred by syringe into the vials charged with substrates (*E*)-**1a** (3.62 mmol, 1.0 g) and added additive HOAc. The vials were subsequently transferred into which hydrogen gas was charged. The reaction was then stirred under  $\text{H}_2$  (50 atm) at 80 °C for 24 h. The hydrogen gas was released slowly and carefully. The solution was passed through a short column of silica gel to remove the metal complex. The solid was washed with  $\text{CH}_2\text{Cl}_2$ , and filtered to give the product **2a** as a white solid (0.96 g, 95% yield) with 94% ee determined by SFC with a chiral column.

A stock solution was made by mixing 1 mol %  $\text{Ni}(\text{OAc})_2 \cdot \text{H}_2\text{O}$  with 1.1 mol % (*R,R*)-Ph-BPE in solvent ( $\text{CF}_3\text{CH}_2\text{OH}$ ) at room temperature for 24 hours in a nitrogen-filled glovebox. An aliquot of the catalyst solution (0.003 mmol) was transferred by syringe into the vials charged with substrates (*E*)-**1p** (3 mmol, 0.93 g) and added additive HOAc. The vials were subsequently transferred into which hydrogen gas was charged. The reaction was then stirred under  $\text{H}_2$  (80 atm) at 80 °C for 4 d. The hydrogen gas was released slowly and carefully. The solution was passed through a short column of silica gel to remove the metal complex. The solid was washed with  $\text{CH}_2\text{Cl}_2$ , and filtered to give the product **2p** as a white solid (0.88 g, 94% yield) with 97% ee determined by SFC with a chiral column.

A stock solution was made by mixing 1 mol %  $\text{Ni}(\text{OAc})_2 \cdot \text{H}_2\text{O}$  with 1.1 mol % (*R,R*)-Ph-BPE in solvent ( $\text{CF}_3\text{CH}_2\text{OH}$ ) at room temperature for 24 hours in a nitrogen-filled glovebox. An aliquot of the catalyst solution (0.003 mmol) was transferred by syringe into the vials charged with substrates (*E*)-**3h** (3 mmol, 1.05 g) and added additive HOAc. The vials were subsequently transferred into which hydrogen gas was

charged. The reaction was then stirred under H<sub>2</sub> (80 atm) at 80 °C for 4 d. The hydrogen gas was released slowly and carefully. The solution was passed through a short column of silica gel to remove the metal complex. The solid was washed with CH<sub>2</sub>Cl<sub>2</sub>, and filtered to give the product **4h** as a white solid (0.66 g, 63% yield) with 99% ee determined by SFC with a chiral column.

## 5. NMR, GC or HPLC, optical rotation and HRMS Data of compound **2** and **4**.

### 1-Fluoro-3-(1-(phenylsulfonyl)propan-2-yl)benzene (**2a**)

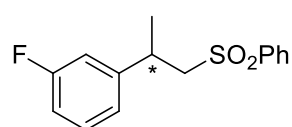

Purification by flash column chromatography (silica gel, PE:EA = 5:1) afforded the product as white solid; 33.3 mg, yield: 96%; 94 ee;  $[\alpha]_D^{20} = +9.1$  (c = 1.0, CH<sub>2</sub>Cl<sub>2</sub>); SFC

conditions (Lux 5u Amylose-1, column temperature: 37.0 °C, MeOH/CO<sub>2</sub> = 10/90, flow rate = 3.0 mL/min,  $\lambda = 210$  nm)  $t_R = 4.0$  min (minor), 4.8 min (major); <sup>1</sup>H NMR (600 MHz, Chloroform-*d*)  $\delta$  7.81-7.77 (m, 2H), 7.60-7.56 (m, 1H), 7.50-7.46 (m, 2H), 7.19-7.15 (m, 1H), 6.87-6.81 (m, 2H), 6.76-6.72 (m, 1H), 3.43-3.37 (m, 2H), 3.34-3.29 (m, 1H), 1.42 (d,  $J = 6.9$  Hz, 3H). MP: 71-73 °C (from ethyl acetate-hexane). The analytical data are consistent with the literature.<sup>1</sup>

### 1-Fluoro-2-(1-(phenylsulfonyl)propan-2-yl)benzene (**2b**)

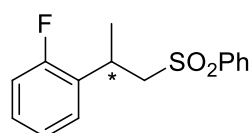

Purification by flash column chromatography (silica gel, PE:EA = 5:1) afforded the product as white solid; 33.7 mg, yield: 97%; 98% ee;  $[\alpha]_D^{20} = +21.1$  (c = 1.0, CH<sub>2</sub>Cl<sub>2</sub>); SFC conditions (Lux

5u Amylose-1, column temperature: 37.0 °C, MeOH/CO<sub>2</sub> = 20/80, flow rate = 3.0 mL/min,  $\lambda = 210$  nm)  $t_R = 2.5$  min (minor), 2.7 min (major); <sup>1</sup>H NMR (600 MHz, Chloroform-*d*)  $\delta$  7.79 (dd,  $J = 8.3, 1.1$  Hz, 2H), 7.59-7.55 (m, 1H), 7.46 (d,  $J = 7.8$  Hz, 2H), 7.14-7.10 (m, 2H), 7.03-6.99 (m, 1H), 6.88-6.83 (m, 1H), 3.60-3.54 (m, 2H), 3.41-3.35 (m, 1H), 1.45 (d,  $J = 6.9$  Hz, 3H). MP: 47-49 °C (from ethyl acetate-hexane). The analytical data are consistent with the literature.<sup>1</sup>

### 1-Fluoro-4-(1-(phenylsulfonyl)propan-2-yl)benzene (**2c**)

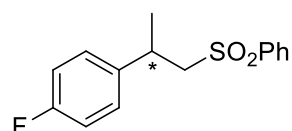

Purification by flash column chromatography (silica gel, PE:EA = 5:1) afforded the product as white solid; 33.7 mg,



yield: 97%; 96% ee;  $[\alpha]_{\text{D}}^{20} = +4.5$  ( $c = 1.7$ ,  $\text{CH}_2\text{Cl}_2$ ); SFC conditions (Lux 5u Amylose-1, column temperature: 37.0 °C,  $\text{MeOH}/\text{CO}_2 = 20/80$ , flow rate = 3.0 mL/min,  $l = 210$  nm)  $t_{\text{R}} = 4.3$  min (major), 5.0 min (minor);  $^1\text{H}$  NMR (400 MHz, Chloroform-*d*)  $\delta$  7.80-7.75 (m, 2H), 7.61-7.57 (m, 1H), 7.50-7.45 (m, 2H), 7.06-7.01 (m, 2H), 6.92-6.86 (m, 2H), 3.44-3.30 (m, 3H), 1.41 (d,  $J = 6.8$  Hz, 3H). MP: 59-61 °C (from ethyl acetate-hexane). The analytical data are consistent with the literature.<sup>1</sup>

#### 1-Chloro-3-(1-(phenylsulfonyl)propan-2-yl)benzene (**2d**)

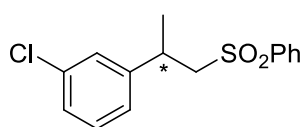

Purification by flash column chromatography (silica gel, PE:EA = 5:1) afforded the product as light yellow liquid; 36.0 mg, yield: 98%; 96% ee;  $[\alpha]_{\text{D}}^{20} = +10.8$  ( $c = 1.0$ ,  $\text{CH}_2\text{Cl}_2$ );

SFC conditions (Lux 5u Amylose-1, column temperature: 37.0 °C,  $\text{MeOH}/\text{CO}_2 = 20/80$ , flow rate = 3.0 mL/min,  $l = 210$  nm)  $t_{\text{R}} = 2.9$  min (minor), 3.5 min (major);  $^1\text{H}$  NMR (400 MHz, Chloroform-*d*)  $\delta$  7.78 (dd,  $J = 8.3, 1.1$  Hz, 2H), 7.61-7.56 (m, 1H), 7.47 (t,  $J = 7.7$  Hz, 2H), 7.15-7.10 (m, 2H), 7.02-6.96 (m, 2H), 3.43-3.38 (m, 2H), 3.36-3.29 (m, 1H), 1.42 (d,  $J = 6.6$  Hz, 3H). The analytical data are consistent with the literature.<sup>1</sup>

#### (*R*)-1-chloro-4-(1-(phenylsulfonyl)propan-2-yl)benzene (**2e**)

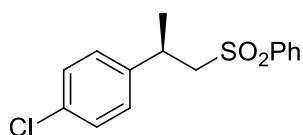

Purification by flash column chromatography (silica gel, PE:EA = 5:1) afforded the product as white solid; 35.3 mg, yield: 96%; 92% ee;  $[\alpha]_{\text{D}}^{20} = +6.3$  ( $c = 1.0$ ,  $\text{CHCl}_3$ ); SFC

conditions (Lux 5u Amylose-1, column temperature: 37.0 °C,  $\text{MeOH}/\text{CO}_2 = 20/80$ , flow rate = 3.0 mL/min,  $l = 210$  nm)  $t_{\text{R}} = 4.3$  min (major), 5.0 min (minor);  $^1\text{H}$  NMR (400 MHz, Chloroform-*d*)  $\delta$  7.80-7.74 (m, 2H), 7.62-7.57 (m, 1H), 7.50-7.44 (m, 2H), 7.19-7.14 (m, 2H), 7.03-6.97 (m, 2H), 3.43-3.31 (m, 3H), 1.41 (d,  $J = 6.7$  Hz, 3H). MP: 63-65 °C (from ethyl acetate-hexane). The absolute configuration of (*R*)-**2e** was determined by comparison with optical rotation data for the reported literature.<sup>3</sup>

#### 1-Bromo-3-(1-(phenylsulfonyl)propan-2-yl)benzene (**2f**)

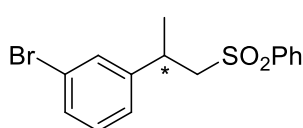

Purification by flash column chromatography (silica gel, PE:EA = 5:1) afforded the product as light yellow liquid; 41.0 mg, yield: 97%; 95% ee;  $[\alpha]_{\text{D}}^{20} = +2.3$  ( $c = 1.0$ ,  $\text{CH}_2\text{Cl}_2$ );

SFC conditions (Lux 5u Amylose-1, column temperature: 37.0 °C, MeOH/CO<sub>2</sub> = 10/90, flow rate = 3.0 mL/min,  $l = 210$  nm)  $t_R = 6.1$  min (minor), 7.7 min (major); <sup>1</sup>H NMR (400 MHz, Chloroform-*d*)  $\delta$  7.80-7.74 (m, 2H), 7.61-7.56 (m, 1H), 7.47 (d,  $J = 15.5$  Hz, 2H), 7.29-7.25 (m, 1H), 7.16 (t,  $J = 1.8$  Hz, 1H), 7.08 (t,  $J = 7.8$  Hz, 1H), 7.04-6.99 (m, 1H), 3.44-3.36 (m, 2H), 3.36-3.30 (m, 1H), 1.41 (d,  $J = 6.6$  Hz, 3H). The analytical data are consistent with the literature.<sup>1</sup>

1-Bromo-4-(1-(phenylsulfonyl)propan-2-yl)benzene (**2g**)

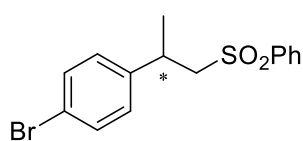

Purification by flash column chromatography (silica gel, PE:EA = 5:1) afforded the product as white solid; 41.0 mg, yield: 97%; 92% ee;  $[\alpha]_D^{20} = +12.3$  ( $c = 1.0$ , CH<sub>2</sub>Cl<sub>2</sub>); SFC

conditions (Lux 5u Amylose-1, column temperature: 37.0 °C, MeOH/CO<sub>2</sub> = 20/80, flow rate = 3.0 mL/min,  $l = 210$  nm)  $t_R = 5.5$  min (major), 6.7 min (minor); <sup>1</sup>H NMR (600 MHz, Chloroform-*d*)  $\delta$  7.79-7.74 (m, 2H), 7.62-7.58 (m, 1H), 7.47 (t,  $J = 7.9$  Hz, 2H), 7.31 (dd,  $J = 8.7, 2.0$  Hz, 2H), 6.94 (d,  $J = 8.4$  Hz, 2H), 3.41-3.37 (m, 2H), 3.32 (dd,  $J = 15.8, 9.1$  Hz, 1H), 1.40 (d,  $J = 6.7$  Hz, 3H). <sup>13</sup>C NMR (100 MHz, Chloroform-*d*)  $\delta = 142.7, 139.7, 133.4, 131.7, 129.1, 128.5, 127.7, 120.6, 63.1, 34.6, 22.2$ ; MP: 85-87 °C (from ethyl acetate-hexane). TOF-HRMS Calculated for C<sub>15</sub>H<sub>16</sub>O<sub>2</sub>BrS ([M+H]<sup>+</sup>): 339.0048, found 339.0053.

1-Methoxy-2-(1-(phenylsulfonyl)propan-2-yl)benzene (**2h**)

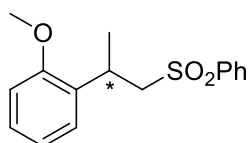

Purification by flash column chromatography (silica gel, PE:EA = 5:1) afforded the product as white solid; 34.8 mg, yield: 96%; 94% ee;  $[\alpha]_D^{20} = +8.5$  ( $c = 1.0$ , CH<sub>2</sub>Cl<sub>2</sub>); SFC conditions (Lux 5u

Cellulose-4, column temperature: 37.0 °C, MeOH/CO<sub>2</sub> = 20/80, flow rate = 3.0 mL/min,  $l = 210$  nm)  $t_R = 4.4$  min (major), 5.0 min (minor); <sup>1</sup>H NMR (600 MHz, Chloroform-*d*)  $\delta$  7.78 (dd,  $J = 8.3, 1.2$  Hz, 2H), 7.59-7.54 (m, 1H), 7.48-7.44 (m, 2H), 6.86-6.82 (m, 1H), 7.06 (dd,  $J = 7.5, 1.6$  Hz, 1H), 6.86-6.82 (m, 1H), 6.66 (d,  $J = 8.2$  Hz, 1H), 3.64-3.57 (m, 5H), 3.31 (dd,  $J = 14.1, 7.6$  Hz, 1H), 1.43 (d,  $J = 7.0$  Hz, 3H). MP: 50-52 °C (from ethyl acetate-hexane). The analytical data are consistent with the literature.<sup>1</sup>

1-Methoxy-3-(1-(phenylsulfonyl)propan-2-yl)benzene (**2i**)

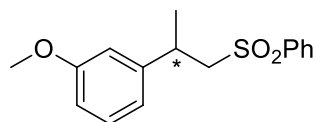

Purification by flash column chromatography (silica gel, PE:EA = 5:1) afforded the product as light yellow liquid; 34.0 mg, yield: 94%; 96% ee;  $[\alpha]_{\text{D}}^{20} = + 11.2$  ( $c = 1.1$ ,  $\text{CH}_2\text{Cl}_2$ ); SFC conditions (Lux 5u Amylose-1, column temperature: 37.0 °C, MeOH/ $\text{CO}_2 = 20/80$ , flow rate = 3.0 mL/min,  $\lambda = 210$  nm)  $t_{\text{R}} = 4.3$  min (major), 4.7 min (minor);  $^1\text{H NMR}$  (600 MHz, Chloroform-*d*)  $\delta$  7.83-7.77 (m, 2H), 7.61-7.55 (m, 1H), 7.48 (t,  $J = 7.8$  Hz, 2H), 7.13 (t,  $J = 7.9$  Hz, 1H), 6.70-6.65 (m, 2H), 6.60-6.57 (m, 1H), 3.74 (s, 3H), 3.43-3.36 (m, 2H), 3.35-3.31 (m, 1H), 1.43 (d,  $J = 6.7$  Hz, 3H). The analytical data are consistent with the literature.<sup>1</sup>

**(R)-1-methyl-4-(1-(phenylsulfonyl)propan-2-yl)benzene (2j)**

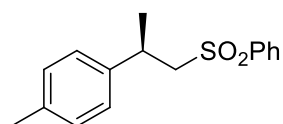

Purification by flash column chromatography (silica gel, PE:EA = 5:1) afforded the product as white solid; 33.6 mg, yield: 98%; 97% ee;  $[\alpha]_{\text{D}}^{20} = + 10.3$  ( $c = 1.0$ ,  $\text{CHCl}_3$ ); SFC conditions (Lux 5u Amylose-1, column temperature: 37.0 °C, MeOH/ $\text{CO}_2 = 10/90$ , flow rate = 3.0 mL/min,  $\lambda = 210$  nm)  $t_{\text{R}} = 6.4$  min (major), 7.4 min (minor);  $^1\text{H NMR}$  (600 MHz, Chloroform-*d*)  $\delta$  7.83-7.77 (m, 2H), 7.61-7.56 (m, 1H), 7.47 (t,  $J = 7.8$  Hz, 2H), 7.02 (d,  $J = 7.9$  Hz, 2H), 6.96 (d,  $J = 8.0$  Hz, 2H), 3.42-3.31 (m, 3H), 2.28 (s, 3H), 1.42 (d,  $J = 6.8$  Hz, 3H). MP: 59-61 °C (from ethyl acetate-hexane). The absolute configuration of (*R*)-**2j** was determined by comparison with optical rotation data for the reported literature.<sup>7</sup>

**1-Methyl-2-(1-(phenylsulfonyl)propan-2-yl)benzene (2k)**

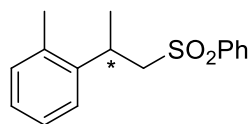

Purification by flash column chromatography (silica gel, PE:EA = 5:1) afforded the product as light yellow liquid; 33.2 mg, yield: 97%; 93% ee;  $[\alpha]_{\text{D}}^{20} = - 4.2$  ( $c = 1.0$ ,  $\text{CH}_2\text{Cl}_2$ ); SFC conditions (Lux 5u Cellulose-4, column temperature: 37.0 °C, MeOH/ $\text{CO}_2 = 20/80$ , flow rate = 3.0 mL/min,  $\lambda = 210$  nm)  $t_{\text{R}} = 3.8$  min (major), 4.5 min (minor);  $^1\text{H NMR}$  (600 MHz, Chloroform-*d*)  $\delta$  7.81 (d,  $J = 8.2$  Hz, 2H), 7.61-7.56 (m, 1H), 7.48 (t,  $J = 7.6$  Hz, 2H), 7.09-7.03 (m, 3H), 7.00 (q,  $J = 4.9, 4.2$  Hz, 1H), 3.70-3.64 (m, 1H) 3.39-3.31 (m, 2H), 2.24 (s, 3H), 1.43 (d,  $J = 6.9$  Hz, 3H). The analytical data are consistent with the

literature.<sup>1</sup>

**(R)-((2-phenylpropyl)sulfonyl)benzene (2l)**

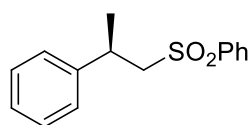

Purification by flash column chromatography (silica gel, PE:EA = 5:1) afforded the product as white solid; 31.5 mg, yield: 97%; 99.9% ee;  $[\alpha]_D^{20} = +6.2$  ( $c = 1.7$ ,  $\text{CHCl}_3$ ); SFC conditions (Lux 5u Cellulose-1, column temperature: 37.0 °C, MeOH/CO<sub>2</sub> = 20/80, flow rate = 3.0 mL/min,  $\lambda = 210$  nm)  $t_R = 2.4$  min (major), 2.5 min (minor); <sup>1</sup>H NMR (400 MHz, Chloroform-*d*)  $\delta$  7.81 (d,  $J = 7.6$  Hz, 2H), 7.60-7.55 (m, 1H), 7.47 (t,  $J = 7.8$  Hz, 2H), 7.24-7.19 (m, 2H), 7.18-7.13 (m, 1H), 7.10-7.03 (m, 2H), 3.45-3.32 (m, 3H), 1.45 (d,  $J = 6.5$  Hz, 3H). MP: 83-85 °C (from ethyl acetate-hexane). The absolute configuration of (*R*)-**2l** was determined by comparison with optical rotation data for the reported literature.<sup>3</sup>

**((2-Phenylbutyl)sulfonyl)benzene (2m)**

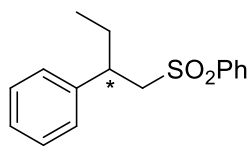

Purification by flash column chromatography (silica gel, PE:EA = 5:1) afforded the product as light yellow solid; 32.8 mg, yield: 96%; 91% ee;  $[\alpha]_D^{20} = +6.9$  ( $c = 1.0$ ,  $\text{CH}_2\text{Cl}_2$ ); SFC conditions (Lux 5u Amylose-1, column temperature: 37.0 °C, MeOH/CO<sub>2</sub> = 20/80, flow rate = 3.0 mL/min,  $\lambda = 210$  nm)  $t_R = 2.9$  min (major), 3.1 min (minor); <sup>1</sup>H NMR (600 MHz, Chloroform-*d*)  $\delta$  7.72 (d,  $J = 8.3$  Hz, 2H), 7.53 (t,  $J = 7.5$  Hz, 1H), 7.41 (t,  $J = 7.8$  Hz, 2H), 7.23-7.11 (m, 3H), 7.00 (d,  $J = 7.0$  Hz, 2H), 3.44 (dd,  $J = 6.6, 3.3$  Hz, 2H), 3.24-3.07 (m, 1H), 2.06-1.87 (m, 1H), 1.70-1.61 (m, 1H), 0.75 (t,  $J = 7.3$  Hz, 3H). MP: 60-62 °C (from ethyl acetate-hexane). The analytical data are consistent with the literature.<sup>1</sup>

**(1-Cyclohexyl-2-(phenylsulfonyl)ethyl)benzene (2n)**

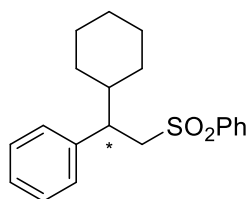

Purification by flash column chromatography (silica gel, PE:EA = 5:1) afforded the product as white solid; 40.2 mg, yield: 98%; 99% ee;  $[\alpha]_D^{20} = -4.7$  ( $c = 1.0$ ,  $\text{CH}_2\text{Cl}_2$ ); SFC conditions (Lux 5u Cellulose-1, column temperature: 37.0 °C, MeOH/CO<sub>2</sub> = 20/80, flow rate = 3.0 mL/min,  $\lambda = 210$  nm)  $t_R = 3.0$  min (minor), 3.3 min (major); <sup>1</sup>H NMR (400 MHz, Chloroform-*d*)  $\delta$  7.64-7.57 (m, 2H), 7.50-7.43 (m, 1H), 7.36-7.30 (m, 2H),

7.12-7.05 (m, 3H), 6.93-6.85 (m, 2H), 3.62-3.52 (m, 2H), 3.08-2.99 (m, 1H), 1.84-1.65 (m, 2H), 1.61-1.38 (m, 4H), 1.21-1.12 (m, 1H), 1.11-0.97 (m, 2H), 0.88-0.72 (m, 2H). <sup>13</sup>C NMR (150 MHz, Chloroform-*d*) δ 140.2, 139.9, 133.1, 128.9, 128.6, 128.1, 127.9, 126.7, 59.7, 46.6, 43.2, 31.1, 29.9, 26.3, 26.3, 26.2. MP: 85-87 °C (from ethyl acetate-hexane). TOF-HRMS Calculated for C<sub>20</sub>H<sub>25</sub>O<sub>2</sub>S ([M+H]<sup>+</sup>): 329.1570, found 329.1576.

#### 1-(1-(Phenylsulfonyl)propan-2-yl)naphthalene (**2o**)

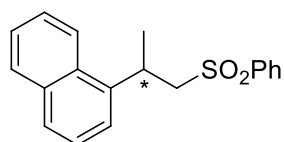

Purification by flash column chromatography (silica gel, PE:EA = 5:1) afforded the product as white solid; 37.5 mg, yield: 97%; 89% ee; [α]<sub>D</sub><sup>20</sup> = - 95.7 (c = 1.0, CH<sub>2</sub>Cl<sub>2</sub>); SFC conditions (Lux 5u Amylose-1, column temperature: 37.0 °C, MeOH/CO<sub>2</sub> = 20/80, flow rate = 3.0 mL/min, l = 210 nm) t<sub>R</sub> = 4.3 min (minor), 4.9 min (major); <sup>1</sup>H NMR (400 MHz, Chloroform-*d*) δ 7.96-7.91 (m, 1H), 7.83 (t, *J* = 5.9 Hz, 3H), 7.69 (d, *J* = 8.0 Hz, 1H), 7.57 (t, *J* = 7.4 Hz, 1H), 7.51-7.43 (m, 4H), 7.35 (t, *J* = 7.6 Hz, 1H), 7.29 (d, *J* = 7.1 Hz, 1H), 4.38-4.25 (m, 1H), 3.57-3.48 (m, 1H), 3.41-3.32 (m, 1H), 1.67 (d, *J* = 6.9 Hz, 3H). MP: 49-51 °C (from ethyl acetate-hexane). The analytical data are consistent with the literature.<sup>1</sup>

#### 2-(1-(Phenylsulfonyl)propan-2-yl)naphthalene (**2p**)

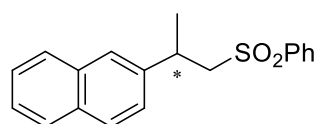

Purification by flash column chromatography (silica gel, PE:EA = 5:1) afforded the product as white solid; 37.9 mg, yield: 97%; 97% ee; [α]<sub>D</sub><sup>20</sup> = + 9.8 (c = 1.0, CHCl<sub>3</sub>); SFC conditions (Lux 5u Amylose-1, column temperature: 37.0 °C, MeOH/CO<sub>2</sub> = 20/80, flow rate = 3.0 mL/min, l = 210 nm) t<sub>R</sub> = 5.4 min (minor), 5.7 min (major); <sup>1</sup>H NMR (600 MHz, Chloroform-*d*) δ 7.79-7.74 (m, 3H), 7.73-7.67 (m, 2H), 7.53-7.50 (m, 1H), 7.49-7.42 (m, 3H), 7.39-7.34 (m, 2H), 7.20-7.15 (m, 1H), 3.63-3.56 (m, 1H), 3.55-3.41 (m, 2H), 1.53 (d, *J* = 6.9 Hz, 3H). MP: 59-61 °C (from ethyl acetate-hexane). The analytical data are consistent with the literature.<sup>3</sup>

#### ((2-Phenylbutyl)sulfonyl)benzene (**2q**)

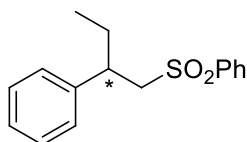

Purification by flash column chromatography (silica gel, PE:EA = 5:1) afforded the product as light yellow solid; 32.9 mg, yield: 96%; 99% ee;  $[\alpha]_{\text{D}}^{20} = -7.3$  ( $c = 1.7$ ,  $\text{CH}_2\text{Cl}_2$ ); SFC conditions (Lux 5u Amylose-1, column temperature: 37.0 °C, MeOH/CO<sub>2</sub> = 20/80, flow rate = 3.0 mL/min,  $\lambda = 210$  nm)  $t_{\text{R}} = 2.9$  min (minor), 3.0 min (major); <sup>1</sup>H NMR (600 MHz, Chloroform-*d*)  $\delta$  7.72 (d,  $J = 8.3$  Hz, 2H), 7.53 (t,  $J = 7.5$  Hz, 1H), 7.41 (t,  $J = 7.8$  Hz, 2H), 7.23- 7.11 (m, 3H), 7.00 (d,  $J = 7.0$  Hz, 2H), 3.44 (dd,  $J = 6.6, 3.3$  Hz, 2H), 3.24-3.07 (m, 1H), 2.06-1.87 (m, 1H), 1.70-1.61 (m, 1H), 0.75 (t,  $J = 7.3$  Hz, 3H). MP: 60-62 °C (from ethyl acetate-hexane). The analytical data are consistent with the literature.<sup>1</sup>

#### 1-Fluoro-4-((2-phenylpropyl)sulfonyl)benzene (**2r**)

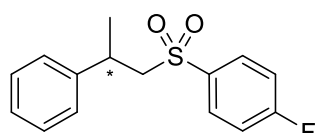

Purification by flash column chromatography (silica gel, PE:EA = 5:1) afforded the product as white solid; 31.6 mg, yield: 91%; 94% ee;  $[\alpha]_{\text{D}}^{20} = +9.5$  ( $c = 1.0$ ,  $\text{CH}_2\text{Cl}_2$ ); SFC conditions (Lux 5u Cellulose-4, column temperature: 37.0 °C, MeOH/CO<sub>2</sub> = 10/90, flow rate = 3.0 mL/min,  $\lambda = 210$  nm)  $t_{\text{R}} = 4.4$  min (major), 4.7 min (minor); <sup>1</sup>H NMR (600 MHz, Chloroform-*d*)  $\delta$  7.79-7.74 (m, 2H), 7.23-7.19 (m, 2H), 7.18-7.15 (m, 1H), 7.13-7.08 (m, 2H), 7.07-7.03 (m, 2H), 3.45-3.39 (m, 2H), 3.38-3.33 (m, 1H), 1.43 (d,  $J = 6.8$  Hz, 3H). <sup>13</sup>C NMR (100 MHz, Chloroform-*d*)  $\delta = 165.5$  (d,  $J = 254.0$  Hz), 143.6, 135.9, 130.7, 130.6, 128.7, 126.8, 116.3, 63.4, 35.2, 22.4; MP: 62-64 °C (from ethyl acetate-hexane); TOF-HRMS Calculated for C<sub>15</sub>H<sub>16</sub>FO<sub>2</sub>S ( $[\text{M}+\text{H}]^+$ ): 279.0849, found 279.0845.

#### 1-Chloro-4-((2-phenylpropyl)sulfonyl)benzene (**2s**)

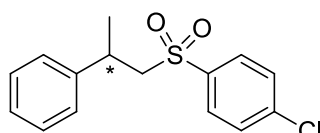

Purification by flash column chromatography (silica gel, PE:EA = 5:1) afforded the product as white solid; 36.0 mg, yield: 98%; 98% ee;  $[\alpha]_{\text{D}}^{20} = +16.2$  ( $c = 1.3$ ,  $\text{CH}_2\text{Cl}_2$ ); SFC conditions (Lux 5u Cellulose-4, column temperature: 37.0 °C, MeOH/CO<sub>2</sub> = 10/90, flow rate = 3.0 mL/min,  $\lambda = 210$  nm)  $t_{\text{R}} = 5.4$  min (minor), 5.8 min (major); <sup>1</sup>H NMR (400 MHz, Chloroform-*d*)  $\delta = 7.67$  (d,  $J = 8.6$  Hz, 2H), 7.40 (d,  $J = 8.5$  Hz, 2H), 7.22-

7.16 (m, 3H), 7.05 (d,  $J = 6.8$  Hz, 2H), 3.46-3.32 (m, 3H), 1.43 (d,  $J = 6.5$  Hz, 3H); MP: 86-90 °C (from ethyl acetate-hexane). The analytical data are consistent with the literature.<sup>8</sup>

1-Fluoro-3-(1-phenyl-2-(phenylsulfonyl)ethyl)benzene (**4a**)

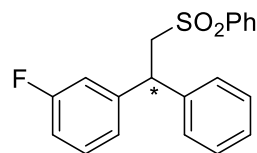

*E*-olefin: Purification by flash column chromatography (silica gel, PE:EA = 5:1) afforded the product as white solid; 41.7 mg, yield: 98%; 98% ee;  $[\alpha]_{\text{D}}^{20} = -6.3$  ( $c = 1.0$ ,  $\text{CHCl}_3$ ); SFC conditions (Lux 5u Cellulose-3, column temperature: 37.0 °C, MeOH/CO<sub>2</sub> = 10/90, flow rate = 3.0 mL/min,  $\lambda = 210$  nm)  $t_{\text{R}} = 6.2$  min (minor), 6.5 min (major); <sup>1</sup>H NMR (400 MHz, Chloroform-*d*)  $\delta$  7.66 (dd,  $J = 8.4, 1.1$  Hz, 2H), 7.54-7.47 (m, 1H), 7.40-7.33 (m, 2H), 7.23-7.10 (m, 6H), 6.95 (d,  $J = 7.7$  Hz, 1H), 6.87-6.77 (m, 2H), 4.63 (t,  $J = 7.1$  Hz, 1H), 3.89 (dd,  $J = 7.1, 1.4$  Hz, 2H). MP: 159-161 °C (from ethyl acetate-hexane). The analytical data are consistent with the literature.<sup>1</sup>

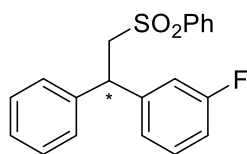

*Z*-olefin: Purification by flash column chromatography (silica gel, PE:EA = 5:1) afforded the product as white solid; 41.2 mg, yield: 97%; 90% ee;  $[\alpha]_{\text{D}}^{20} = +5.3$  ( $c = 1.0$ ,  $\text{CHCl}_3$ ); SFC conditions (Lux 5u Cellulose-3, column temperature: 37.0 °C, MeOH/CO<sub>2</sub> = 10/90, flow rate = 3.0 mL/min,  $\lambda = 210$  nm)  $t_{\text{R}} = 6.3$  min (major), 6.7 min (minor); <sup>1</sup>H NMR (400 MHz, Chloroform-*d*)  $\delta$  7.66 (dd,  $J = 8.4, 1.1$  Hz, 2H), 7.54-7.47 (m, 1H), 7.40-7.33 (m, 2H), 7.23-7.10 (m, 6H), 6.95 (d,  $J = 7.7$  Hz, 1H), 6.87-6.77 (m, 2H), 4.63 (t,  $J = 7.1$  Hz, 1H), 3.89 (dd,  $J = 7.1, 1.4$  Hz, 2H). MP: 159-161 °C (from ethyl acetate-hexane). The analytical data are consistent with the literature.<sup>1</sup>

1-Fluoro-4-(1-phenyl-2-(phenylsulfonyl)ethyl)benzene (**4b**)

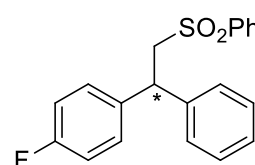

Purification by flash column chromatography (silica gel, PE:EA = 5:1) afforded the product as white solid; 41.2 mg, yield: 97%; 99% ee;  $[\alpha]_{\text{D}}^{20} = -2.7$  ( $c = 1.0$ ,  $\text{CHCl}_3$ ); SFC conditions (Lux 5u Cellulose-3, column temperature: 37.0 °C, MeOH/CO<sub>2</sub> = 10/90, flow rate = 3.0 mL/min,  $\lambda = 210$  nm)  $t_{\text{R}} = 6.5$  min (minor), 7.6 min (major); <sup>1</sup>H NMR (600 MHz, Chloroform-*d*)  $\delta$  7.63 (d,  $J = 7.1$  Hz, 2H), 7.55-7.46 (m, 2H), 7.41-7.32 (m, 2H), 7.25 (s, 1H), 7.21-

7.05 (m, 6H), 6.87 (d,  $J = 8.1$  Hz, 2H), 4.74-4.59 (m, 1H), 3.99-3.82 (m, 2H). MP: 159-161 °C (from ethyl acetate-hexane). The analytical data are consistent with the literature.<sup>1</sup>

#### 1-Chloro-4-(1-phenyl-2-(phenylsulfonyl)ethyl)benzene (**4c**)

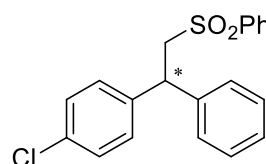

Purification by flash column chromatography (silica gel, PE:EA = 5:1) afforded the product as white solid; 43.6 mg, yield: 98%; 95% ee;  $[\alpha]_{\text{D}}^{20} = -5.9$  ( $c = 1.0$ ,  $\text{CHCl}_3$ ); SFC conditions (Lux 5u Cellulose-3, column temperature: 37.0 °C, MeOH/CO<sub>2</sub> = 30/70, flow rate = 3.0 mL/min,  $l = 210$  nm)  $t_{\text{R}} = 3.2$  min (minor), 3.4 min (major); <sup>1</sup>H NMR (600 MHz, Chloroform-*d*)  $\delta$  7.64 (d,  $J = 7.5$  Hz, 2H), 7.52 (t,  $J = 7.5$  Hz, 1H), 7.39-7.35 (m, 2H), 7.22-7.13 (m, 6H), 7.10 (d,  $J = 7.2$  Hz, 2H), 7.06 (s, 1H), 4.62 (t,  $J = 7.1$  Hz, 1H), 3.92-3.84 (m, 2H). MP: 91-93 °C (from ethyl acetate-hexane). The analytical data are consistent with the literature.<sup>1</sup>

#### 1-Methyl-2-(1-phenyl-2-(phenylsulfonyl)ethyl)benzene (**4d**)

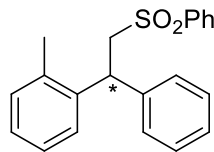

Purification by flash column chromatography (silica gel, PE:EA = 5:1) afforded the product as white solid; 39.9 mg, yield: 95%; 90% ee;  $[\alpha]_{\text{D}}^{20} = -15.8$  ( $c = 1.0$ ,  $\text{CHCl}_3$ ); SFC conditions (Lux 5u Cellulose-3, column temperature: 37.0 °C, MeOH/CO<sub>2</sub> = 30/70, flow rate = 3.0 mL/min,  $l = 210$  nm)  $t_{\text{R}} = 2.5$  min (major), 2.9 min (minor); <sup>1</sup>H NMR (600 MHz, Chloroform-*d*)  $\delta$  7.65 (d,  $J = 7.4$  Hz, 2H), 7.49 (t,  $J = 7.4$  Hz, 1H), 7.35 (t,  $J = 7.8$  Hz, 2H), 7.21-7.18 (m, 2H), 7.14 (d,  $J = 7.2$  Hz, 3H), 7.10-6.97 (m, 4H), 4.96-4.86 (m, 1H), 3.88 (d,  $J = 8.8$  Hz, 2H), 2.32 (s, 3H). MP: 65-67 °C (from ethyl acetate-hexane). The analytical data are consistent with the literature.<sup>1</sup>

#### 1-Methyl-3-(1-phenyl-2-(phenylsulfonyl)ethyl)benzene (**4e**)

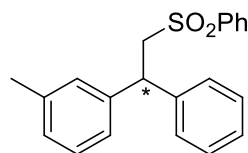

Purification by flash column chromatography (silica gel, PE:EA = 5:1) afforded the product as white solid; 40.3 mg, yield: 96%; 95% ee;  $[\alpha]_{\text{D}}^{20} = -1.6$  ( $c = 1.0$ ,  $\text{CHCl}_3$ ); SFC conditions (Lux 5u Cellulose-3, column temperature: 37.0 °C, MeOH/CO<sub>2</sub> = 30/70, flow rate = 3.0 mL/min,  $l = 210$  nm)  $t_{\text{R}} = 2.6$  min (minor), 3.0 min (major); <sup>1</sup>H NMR (400 MHz, Chloroform-*d*)



$\delta$  7.63 (d,  $J = 7.4$  Hz, 2H), 7.48 (t,  $J = 7.4$  Hz, 1H), 7.33 (t,  $J = 7.7$  Hz, 2H), 7.20-7.11 (m, 5H), 7.06 (d,  $J = 7.6$  Hz, 1H), 6.95-6.85 (m, 3H), 4.59 (t,  $J = 7.0$  Hz, 1H), 3.91 (d,  $J = 7.1$  Hz, 2H), 2.21 (s, 3H). MP: 91-93 °C (from ethyl acetate-hexane). The analytical data are consistent with the literature.<sup>1</sup>

1-Methyl-4-(1-phenyl-2-(phenylsulfonyl)ethyl)benzene (**4f**)

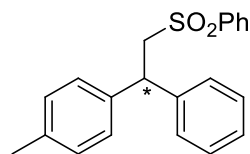

*E*-olefin: Purification by flash column chromatography (silica gel, PE:EA = 5:1) afforded the product as white solid; 39.9 mg, yield: 95%; 97% ee;  $[\alpha]_D^{20} = -2.5$  ( $c = 1.0$ ,  $\text{CHCl}_3$ ); SFC conditions (Lux 5u Cellulose-3, column temperature: 37.0 °C, MeOH/CO<sub>2</sub> = 30/70, flow rate = 3.0 mL/min,  $\lambda = 210$  nm)  $t_R = 2.6$  min (minor), 2.9 min (major); <sup>1</sup>H NMR (600 MHz, Chloroform-*d*)  $\delta$  7.64 (d,  $J = 8.0$  Hz, 2H), 7.49 (t,  $J = 7.4$  Hz, 1H), 7.36-7.32 (m, 2H), 7.19-7.16 (m, 2H), 7.14-7.10 (m, 3H), 7.03-6.98 (m, 4H), 4.59 (t,  $J = 7.2$  Hz, 1H), 3.90 (d,  $J = 7.2$  Hz, 2H), 2.25 (s, 3H). MP: 149-151 °C (from ethyl acetate-hexane). The analytical data are consistent with the literature.<sup>1</sup>

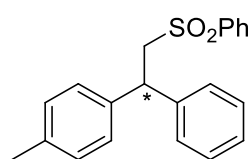

*E/Z* (4/5): Purification by flash column chromatography (silica gel, PE:EA = 5:1) afforded the product as white solid; 39.5 mg, yield: 94%; 8% ee;  $[\alpha]_D^{20} = -5.2$  ( $c = 1.0$ ,  $\text{CH}_2\text{Cl}_2$ ); SFC conditions (Lux 5u Cellulose-3, column temperature: 37.0 °C, MeOH/CO<sub>2</sub> = 20/80, flow rate = 3.0 mL/min,  $\lambda = 210$  nm)  $t_R = 4.1$  min (minor), 5.1 min (major).

1,2-Dichloro-4-(1-phenyl-2-(phenylsulfonyl)ethyl)benzene (**4g**)

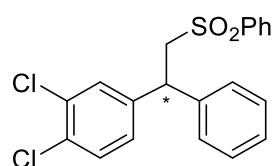

Purification by flash column chromatography (silica gel, PE:EA = 5:1) afforded the product as white solid; 47.2 mg, yield: 97%; 91% ee;  $[\alpha]_D^{20} = -6.4$  ( $c = 1.1$ ,  $\text{CHCl}_3$ ); SFC conditions (Lux 5u Amylose-1, column temperature: 37.0 °C, MeOH/CO<sub>2</sub> = 30/70, flow rate = 3.0 mL/min,  $\lambda = 210$  nm)  $t_R = 4.6$  min (minor), 4.9 min (major); <sup>1</sup>H NMR (400 MHz, Chloroform-*d*)  $\delta$  7.67-7.63 (m, 2H), 7.53 (t,  $J = 7.4$  Hz, 1H), 7.45-7.33 (m, 3H), 7.24-7.18 (m, 3H), 7.15 (d,  $J = 2.0$  Hz, 1H), 7.10 (d,  $J = 7.0$  Hz, 2H), 7.00 (dd,  $J = 8.3, 2.0$  Hz, 1H), 4.64-4.55 (m, 1H), 3.92-3.79 (m, 2H). MP: 99-101 °C (from ethyl acetate-hexane). The analytical data are consistent with the literature.<sup>1</sup>

### 1,3-Dimethyl-5-(1-phenyl-2-(phenylsulfonyl)ethyl)benzene (**4h**)

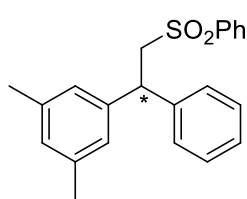

Purification by flash column chromatography (silica gel, PE:EA = 5:1) afforded the product as white solid; 40.7 mg, yield: 93%; 99% ee;  $[\alpha]_{\text{D}}^{20} = -5.0$  ( $c = 1.0$ ,  $\text{CHCl}_3$ ); SFC conditions (Lux 5u Cellulose-3, column temperature: 37.0 °C, MeOH/CO<sub>2</sub> = 30/70, flow rate = 3.0 mL/min,  $l = 210$  nm)  $t_{\text{R}} = 2.1$  min (minor), 2.5 min (major); <sup>1</sup>H NMR (600 MHz, Chloroform-*d*)  $\delta$  7.68-7.58 (m, 2H), 7.54-7.40 (m, 1H), 7.36-7.30 (m, 2H), 7.21-7.11 (m, 5H), 6.72 (d,  $J = 22.4$  Hz, 3H), 4.54 (t,  $J = 7.1$  Hz, 1H), 3.90 (d,  $J = 7.2$  Hz, 2H), 2.18 (s, 6H). MP: 103-105 °C (from ethyl acetate-hexane). The analytical data are consistent with the literature.<sup>1</sup>

### 1-Chloro-4-(2-(phenylsulfonyl)-1-(*p*-tolyl)ethyl)benzene (**4i**)

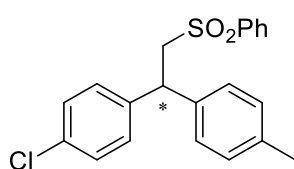

Purification by flash column chromatography (silica gel, PE:EA = 5:1) afforded the product as white solid; 42.6 mg, yield: 92%; 94% ee;  $[\alpha]_{\text{D}}^{20} = +4.3$  ( $c = 1.0$ ,  $\text{CHCl}_3$ ); SFC conditions (Lux 5u Cellulose-3, column temperature: 37.0 °C, MeOH/CO<sub>2</sub> = 30/70, flow rate = 3.0 mL/min,  $l = 210$  nm)  $t_{\text{R}} = 3.0$  min (major), 3.4 min (minor); <sup>1</sup>H NMR (400 MHz, Chloroform-*d*)  $\delta$  7.66-7.61 (m, 2H), 7.56-7.50 (m, 1H), 7.36 (t,  $J = 7.9$  Hz, 2H), 7.15-7.12 (m, 2H), 7.08-7.03 (m, 2H), 7.02-6.96 (m, 4H), 4.58 (t,  $J = 7.2$  Hz, 1H), 3.91-3.83 (m, 2H), 2.26 (s, 3H). <sup>13</sup>C NMR (100 MHz, Chloroform-*d*)  $\delta$  159.9, 139.2, 137.8, 136.7, 136.3, 132.7, 128.9, 128.7, 128.6, 128.4, 127.4, 126.8, 115.1, 114.9, 61.1, 44.5, 20.4. MP: 156-158 °C (from ethyl acetate-hexane). TOF-HRMS Calculated for C<sub>21</sub>H<sub>20</sub>ClO<sub>2</sub>S ( $[\text{M}+\text{H}]^+$ ): 371.0867 found 371.0869.

### 1-Fluoro-4-(2-(phenylsulfonyl)-1-(*p*-tolyl)ethyl)benzene (**4j**)

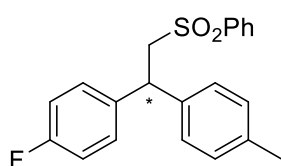

Purification by flash column chromatography (silica gel, PE:EA = 5:1) afforded the product as white solid; 42.0 mg, yield: 95%; 96% ee;  $[\alpha]_{\text{D}}^{20} = +2.7$  ( $c = 1.0$ ,  $\text{CHCl}_3$ ); SFC conditions (Lux 5u Cellulose-3, column temperature: 37.0 °C, MeOH/CO<sub>2</sub> = 30/70, flow rate = 3.0 mL/min,  $l = 210$  nm)  $t_{\text{R}} = 5.4$  min (major), 5.9 min (minor); <sup>1</sup>H NMR (400 MHz, Chloroform-*d*)  $\delta$  7.64 (d,  $J = 9.0$  Hz, 2H), 7.52 (t,  $J = 7.4$  Hz, 1H), 7.36 (t,

$J = 7.7$  Hz, 2H), 7.12-7.05 (m, 2H), 6.99 (d,  $J = 8.9$  Hz, 4H), 6.86 (t,  $J = 8.6$  Hz, 2H), 4.59 (t,  $J = 7.1$  Hz, 1H), 3.89-3.78 (m, 2H), 2.26 (s, 3H). MP: 154-156 °C (from ethyl acetate-hexane). The analytical data are consistent with the literature.<sup>1</sup>

#### 1-Methyl-3-(2-(phenylsulfonyl)-1-(*p*-tolyl)ethyl)benzene (**4k**)

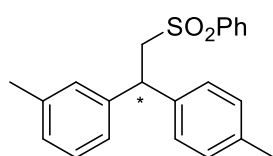

Purification by flash column chromatography (silica gel, PE:EA = 5:1) afforded the product as white solid; 41.5 mg, yield: 95%; 97% ee;  $[\alpha]_D^{20} = +1.8$  (c = 1.0, CHCl<sub>3</sub>); SFC conditions (Lux 5u Cellulose-3, column temperature: 37.0 °C, MeOH/CO<sub>2</sub> = 30/70, flow rate = 3.0 mL/min,  $\lambda = 210$  nm)  $t_R = 2.8$  min (major), 3.0 min (minor); <sup>1</sup>H NMR (600 MHz, Chloroform-*d*)  $\delta$  7.62 (d,  $J = 7.5$  Hz, 2H), 7.48 (t,  $J = 7.4$  Hz, 1H), 7.33 (t,  $J = 7.7$  Hz, 2H), 7.06 (t,  $J = 7.6$  Hz, 1H), 7.03-6.97 (m, 4H), 6.92 (d,  $J = 7.3$  Hz, 2H), 6.88 (s, 1H), 4.55 (t,  $J = 7.1$  Hz, 1H), 3.89 (d,  $J = 7.1$  Hz, 2H), 2.23 (d,  $J = 26.0$  Hz, 6H). MP: 116-118 °C (from ethyl acetate-hexane). The analytical data are consistent with the literature.<sup>1</sup>

#### 1-Fluoro-3-(2-(phenylsulfonyl)-1-(*m*-tolyl)ethyl)benzene (**4l**)

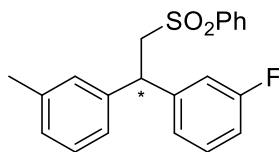

Purification by flash column chromatography (silica gel, PE:EA = 5:1) afforded the product as white solid; 40.7 mg, yield: 92%; 96% ee;  $[\alpha]_D^{20} = -2.2$  (c = 1.1, CHCl<sub>3</sub>); SFC conditions (Lux 5u Cellulose-3, column temperature: 37.0 °C, MeOH/CO<sub>2</sub> = 30/70, flow rate = 3.0 mL/min,  $\lambda = 210$  nm)  $t_R = 2.2$  min (minor), 2.6 min (major); <sup>1</sup>H NMR (600 MHz, Chloroform-*d*)  $\delta$  7.71-7.62 (m, 2H), 7.56-7.48 (m, 1H), 7.41-7.33 (m, 2H), 7.20-7.14 (m, 1H), 7.09 (t,  $J = 7.6$  Hz, 1H), 7.02-6.91 (m, 3H), 6.89 (d,  $J = 20.2$  Hz, 1H), 6.87-6.76 (m, 2H), 4.59 (t,  $J = 7.1$  Hz, 1H), 3.88 (dd,  $J = 7.1, 1.8$  Hz, 2H), 2.23 (s, 3H). MP: 100-102 °C (from ethyl acetate-hexane). The analytical data are consistent with the literature.<sup>1</sup>

#### 3-(1-Phenyl-2-(phenylsulfonyl)ethyl)pyridine (**4m**)

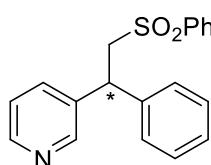

*E/Z* (9/1): Purification by flash column chromatography (silica gel, PE:EA = 1:2) afforded the product as white solid; 8.1 mg, yield: 20%; 78% ee;  $[\alpha]_D^{20} = -0.6$  (c = 0.2, CH<sub>2</sub>Cl<sub>2</sub>); SFC conditions (Lux 5u Amylose-1, column temperature: 37.0 °C, MeOH/CO<sub>2</sub> = 30/70, flow rate = 3.0 mL/min,

$l = 210 \text{ nm}$ )  $t_R = 9.5 \text{ min}$  (minor),  $12.1 \text{ min}$  (major);  $^1\text{H NMR}$  (600 MHz, Chloroform-*d*)  $\delta$  8.5 (s, 1H), 8.39 (d,  $J = 4.0 \text{ Hz}$ , 1H), 7.68-7.66 (m, 2H), 7.53-7.50 (m, 1H), 7.45 (dt,  $J = 7.9, 2.0 \text{ Hz}$ , 1H), 7.39-7.36 (m, 2H), 7.23-7.21 (m, 2H), 7.18-7.15 (m, 1H), 7.13-7.09 (m, 3H), 4.67-4.64 (m, 1H), 3.95-3.88 (m, 2H).  $^{13}\text{C NMR}$  (151 MHz, Chloroform-*d*)  $\delta$  149.2, 148.3, 140.4, 139.4, 136.8, 134.9, 133.5, 129.1, 129.0, 127.9, 127.4, 123.4, 60.9, 43.8. MP: 109-110 °C (from ethyl acetate-hexane). TOF-HRMS Calculated for  $\text{C}_{19}\text{H}_{18}\text{NO}_2\text{S}$  ( $[\text{M}+\text{H}]^+$ ): 324.1053, found 324.1059.

#### 1-Methyl-4-(2-(methylsulfonyl)-1-phenylethyl)benzene (**4n**)

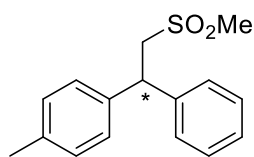

*E/Z* (5/4): Purification by flash column chromatography (silica gel, PE:EA = 5:1) afforded the product as colorless oil; 32.6 mg, yield: 95%; 14% ee;  $[\alpha]_{\text{D}}^{20} = + 2.1$  ( $c = 1.0$ ,  $\text{CH}_2\text{Cl}_2$ ); SFC

conditions (Lux 5u Cellulose-3, column temperature: 37.0 °C, MeOH/CO<sub>2</sub> = 20/80, flow rate = 3.0 mL/min,  $l = 210 \text{ nm}$ )  $t_R = 3.1 \text{ min}$  (minor),  $3.3 \text{ min}$  (major);  $^1\text{H NMR}$  (600 MHz, Chloroform-*d*)  $\delta$  7.35-7.33 (m, 1H), 7.33-7.30 (m, 3H), 7.26-7.23 (m, 1H), 7.22-7.21 (m, 2H), 7.15 (d,  $J = 7.9 \text{ Hz}$ , 2H), 4.64 (t,  $J = 7.3 \text{ Hz}$ , 1H), 3.80-3.73 (m, 2H), 2.32 (s, 3H), 2.31 (s, 3H).  $^{13}\text{C NMR}$  (151 MHz, Chloroform-*d*)  $\delta$  141.9, 138.6, 137.2, 129.9, 129.2, 127.7, 127.7, 127.4, 61.0, 46.0, 42.1, 21.1. TOF-HRMS Calculated for  $\text{C}_{16}\text{H}_{19}\text{O}_2\text{S}$  ( $[\text{M}+\text{H}]^+$ ): 275.1100, found 275.1108.

## 6. References

1. Q. Yan, G. Xiao, Y. Wang, G. Zi, Z. Zhang and G. Hou, Highly Efficient Enantioselective Synthesis of Chiral Sulfones by Rh-Catalyzed Asymmetric Hydrogenation, *J. Am. Chem. Soc.* 2019, **141**, 1749-1756.
2. H.-M. Guo, B.-Q. He and X. Wu, Direct Photoexcitation of Xanthate Anions for Deoxygenative Alkenylation of Alcohols. *Org. Lett.* 2022, **24**, 3199-3204.
3. J.-N. Desrosiers and A. B. Charette, Catalytic enantioselective reduction of  $\beta,\beta$ -disubstituted vinyl phenyl sulfones by using bisphosphine monoxide ligands, *Angew. Chem., Int. Ed.* 2007, **46**, 5955-5957, S5955/1-S5955/39.
4. H. Guo and S. Ma, Highly regio- and stereoselective palladium(0)-catalyzed addition of organoboronic acids with 1,2-allenic sulfones, sulfoxides, or alkyl- or aryl-

substituted allenes in the presence of acetic acid: an efficient synthesis of *E*-alkenes, *Synthesis* 2007, 2731-2745.

5. N. Kamigata, H. Sawada and M. Kobayashi, Reactions of arenesulfonyl chlorides with olefins catalyzed by a ruthenium(II) complex, *J. Org. Chem.* 1983, **48**, 3793-3796.

6. H. Fillion and A. Boucherle, Hydroxysulfoxides and hydroxysulfones. Ethylenic sulfoxides and sulfones. Preparation and structure determination. *Bull. Soc. Chim. Fr.* 1972, **7**, 2699-2710.

7. S. Serra, Preparation and use of enantioenriched 2-aryl-propylsulfonylbenzene derivatives as valuable building blocks for the enantioselective synthesis of bisabolane sesquiterpenes, *Tetrahedron: Asymmetry* 2014, **25**, 1561-1572.

8. G. H. Posner and D. J. Brunelle, Reaction of  $\alpha,\beta$ -ethylenic sulfur compounds with organocopper reagents, *J. Org. Chem.* 1973, **38**, 2747-2756.

## 7. NMR, SFC and HPLC spectra

### (*E*)-1-fluoro-3-(1-(phenylsulfonyl)prop-1-en-2-yl)benzene (**1a**)

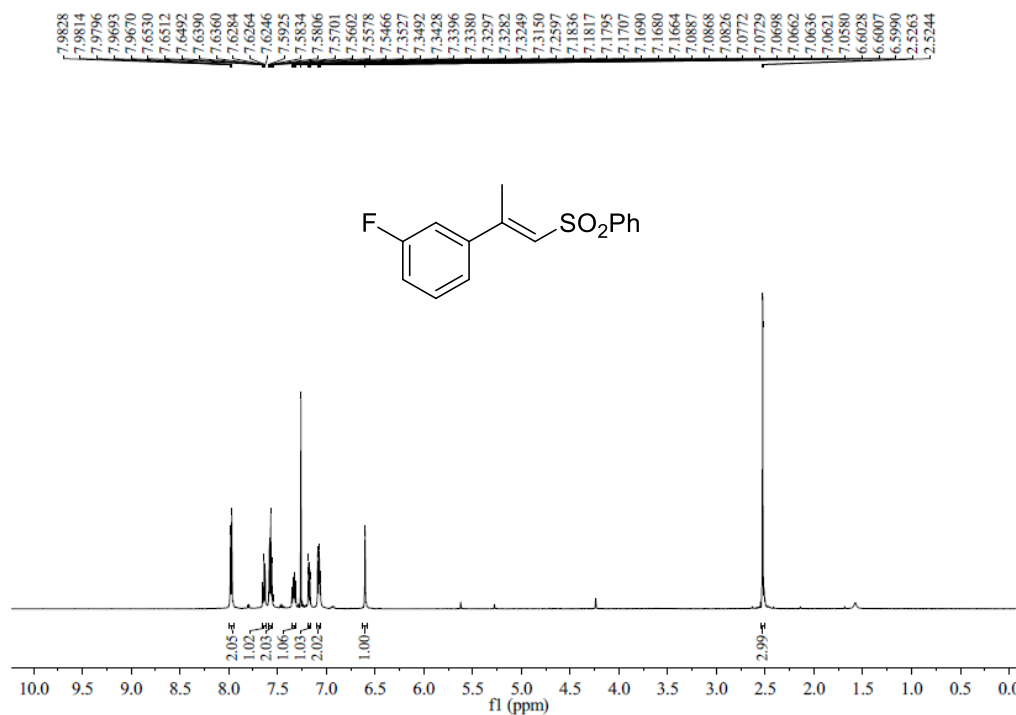

<sup>1</sup>H NMR (600 MHz, Chloroform-*d*)

### (*E*)-1-fluoro-2-(1-(phenylsulfonyl)prop-1-en-2-yl)benzene (**1b**)

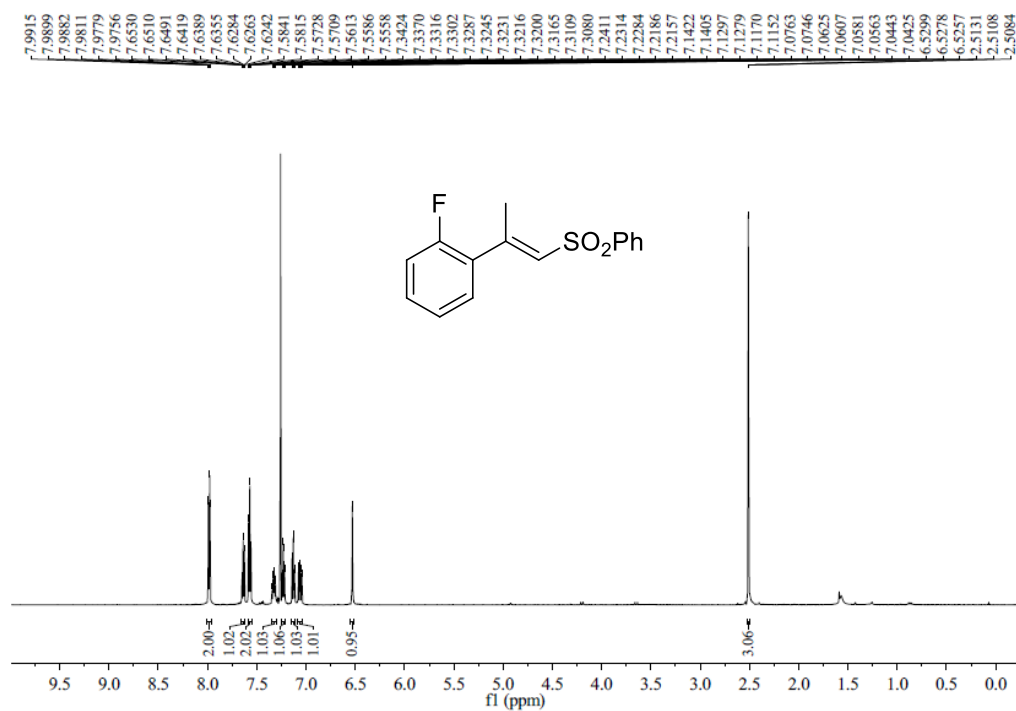

<sup>1</sup>H NMR (600 MHz, Chloroform-*d*)

*(E)*-1-fluoro-4-(1-(phenylsulfonyl)prop-1-en-2-yl)benzene (**1c**)

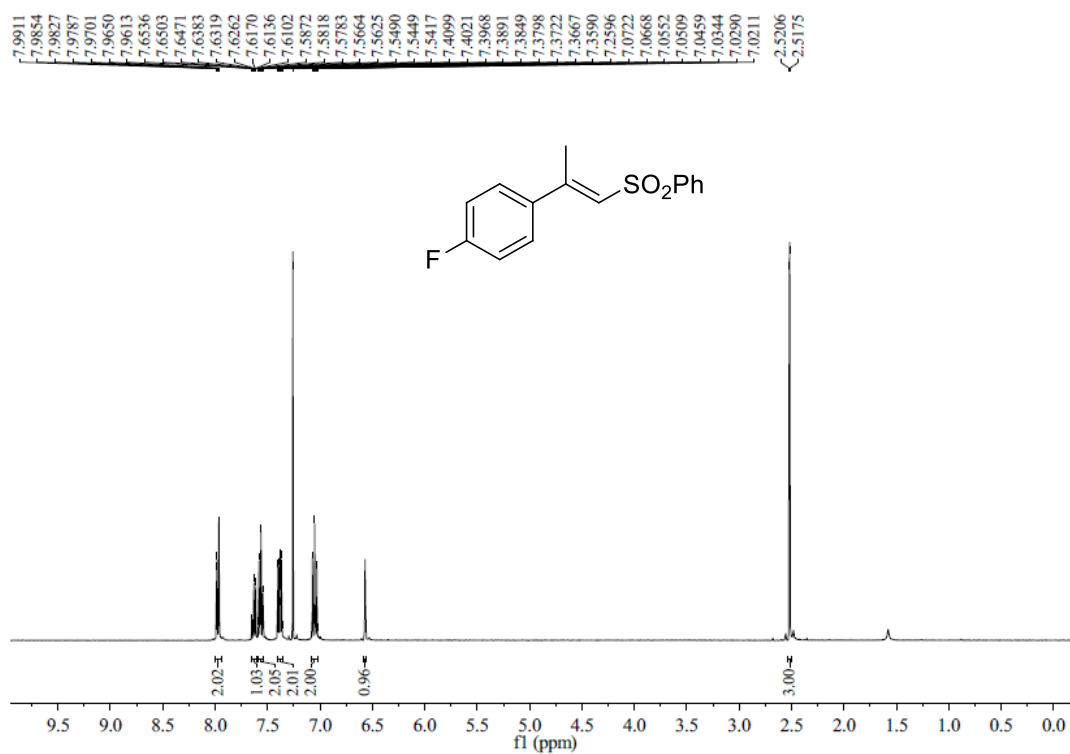

<sup>1</sup>H NMR (400 MHz, Chloroform-*d*)

*(E)*-1-chloro-3-(1-(phenylsulfonyl)prop-1-en-2-yl)benzene (**1d**)

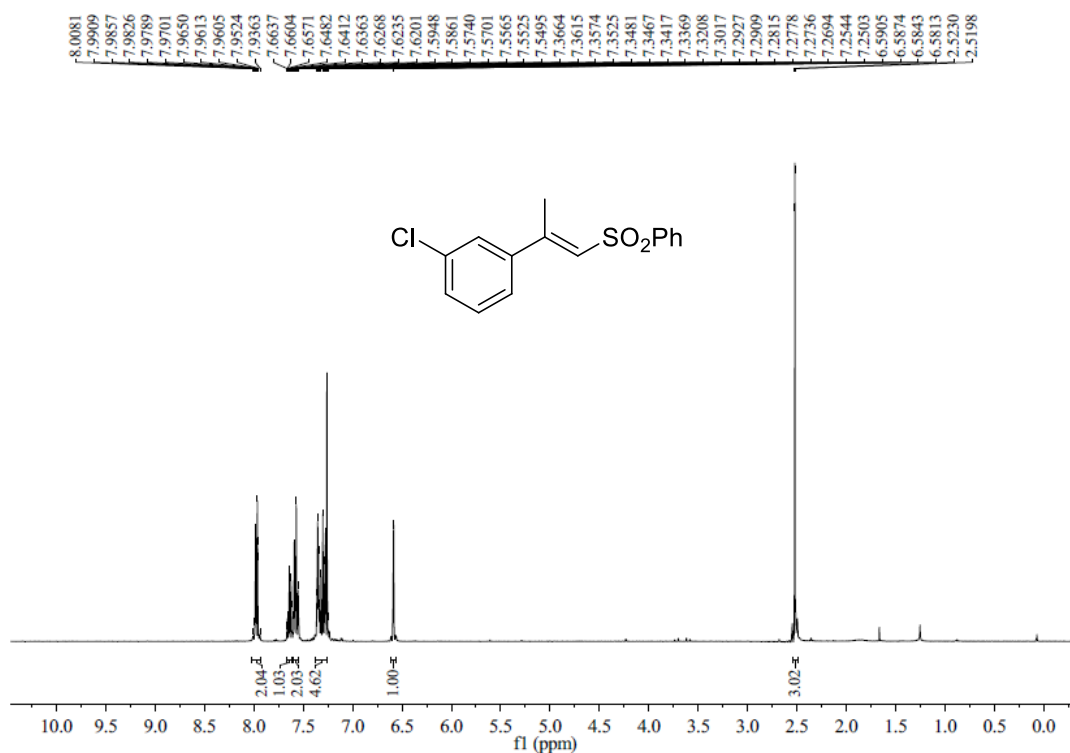

<sup>1</sup>H NMR (400 MHz, Chloroform-*d*)

*(E)*-1-chloro-4-(1-(phenylsulfonyl)prop-1-en-2-yl)benzene (**1e**)

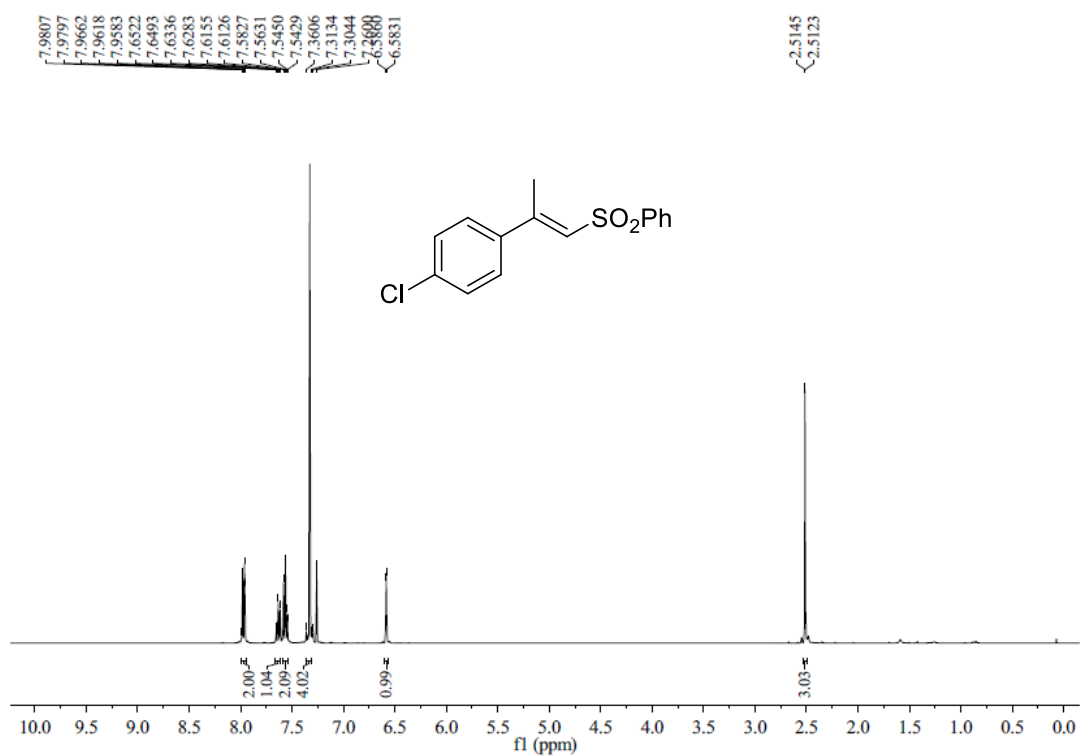

<sup>1</sup>H NMR (400 MHz, Chloroform-*d*)

*(E)*-1-bromo-3-(1-(phenylsulfonyl)prop-1-en-2-yl)benzene (**1f**)

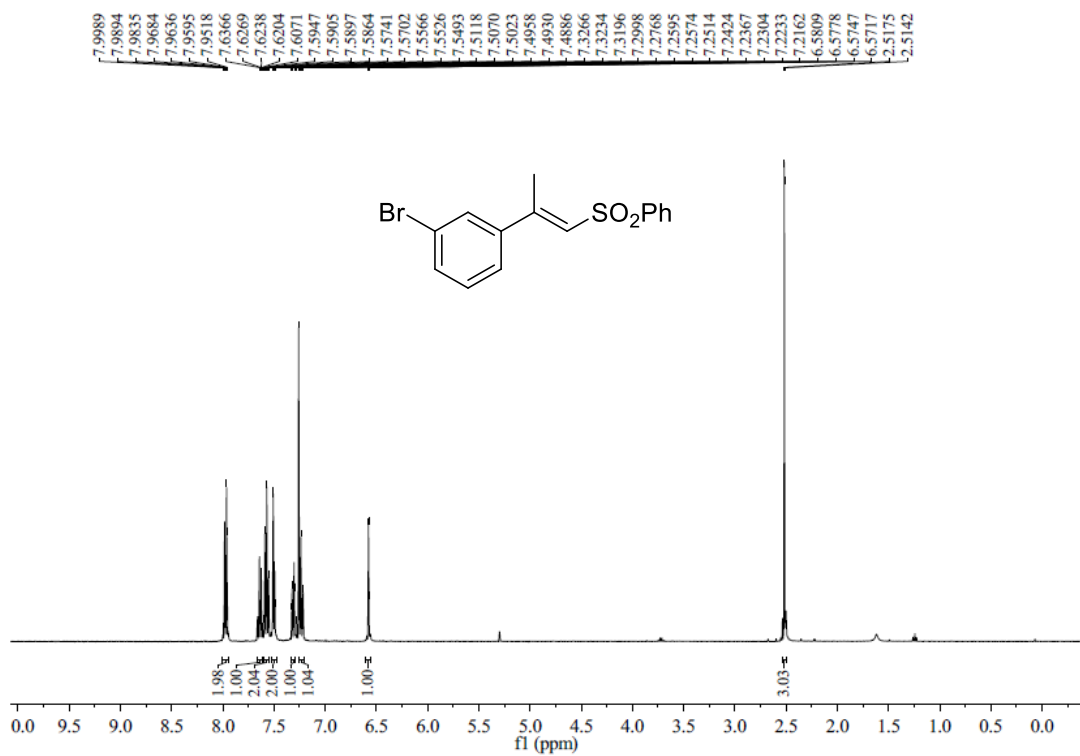

<sup>1</sup>H NMR (400 MHz, Chloroform-*d*)



(*E*)-1-bromo-4-(1-(phenylsulfonyl)prop-1-en-2-yl)benzene (**1g**)

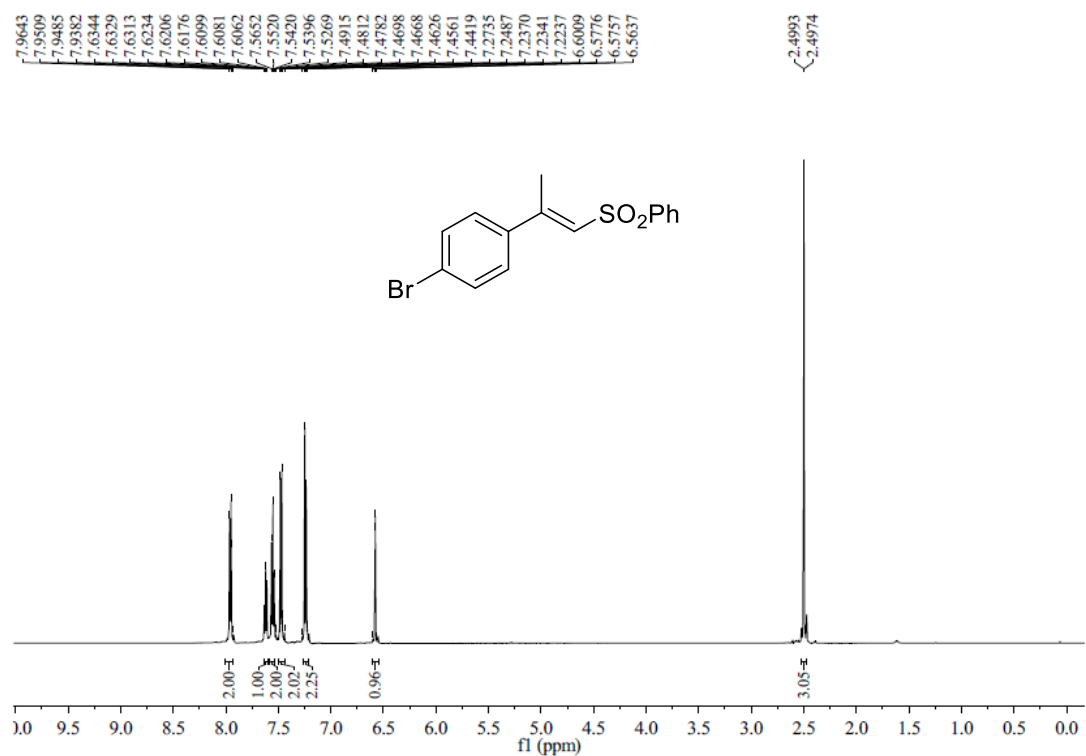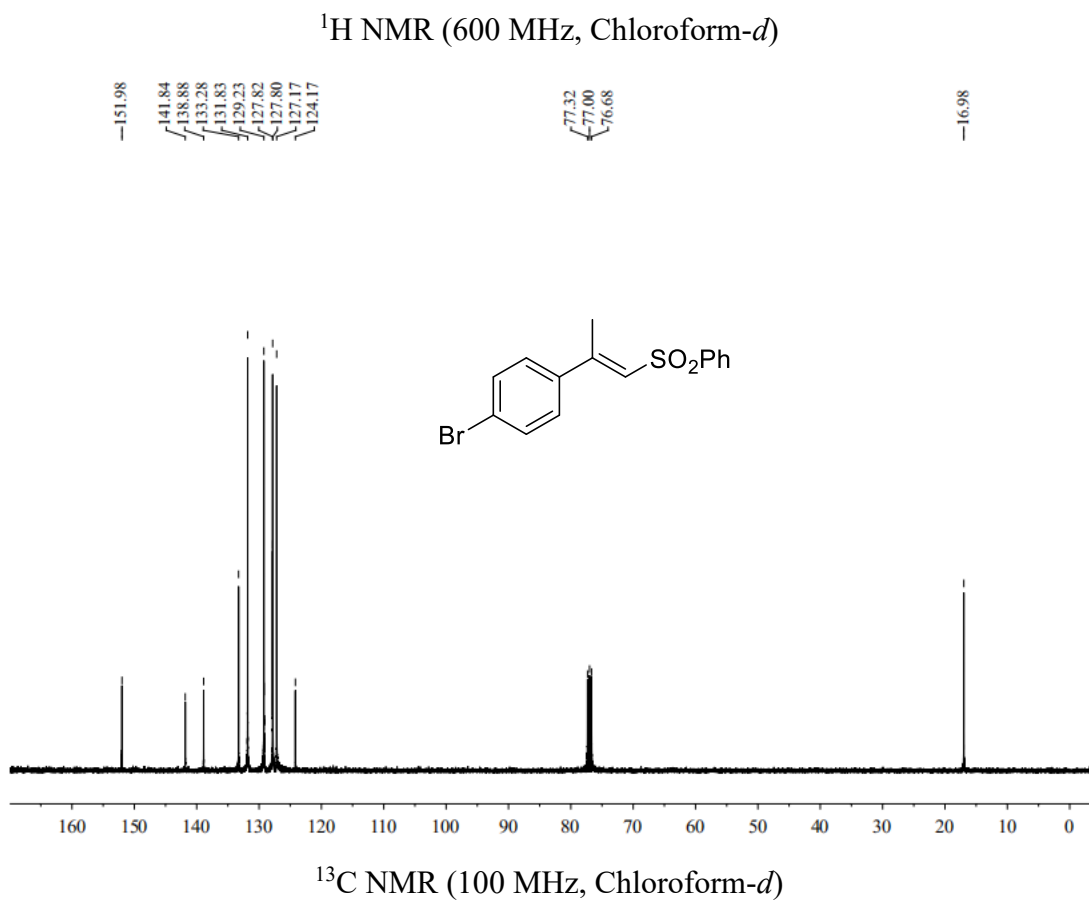

*(E)*-1-methoxy-2-(1-(phenylsulfonyl)prop-1-en-2-yl)benzene (**1h**)

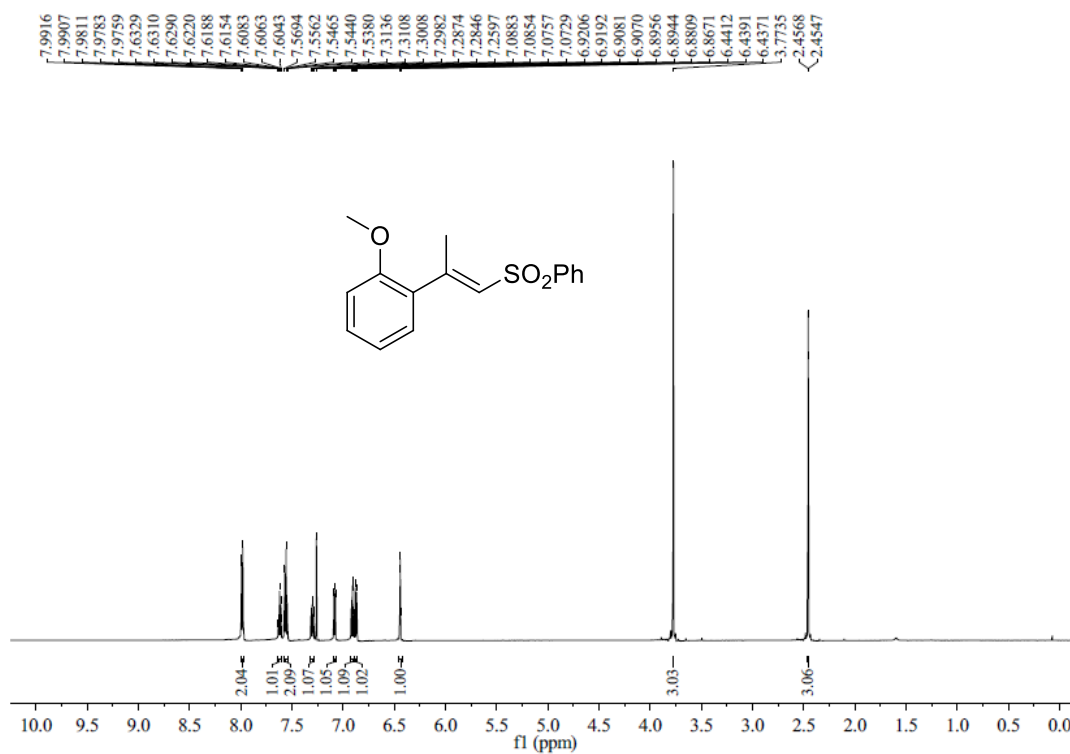

<sup>1</sup>H NMR (600 MHz, Chloroform-*d*)

*(E)*-1-methoxy-3-(1-(phenylsulfonyl)prop-1-en-2-yl)benzene (**1i**)

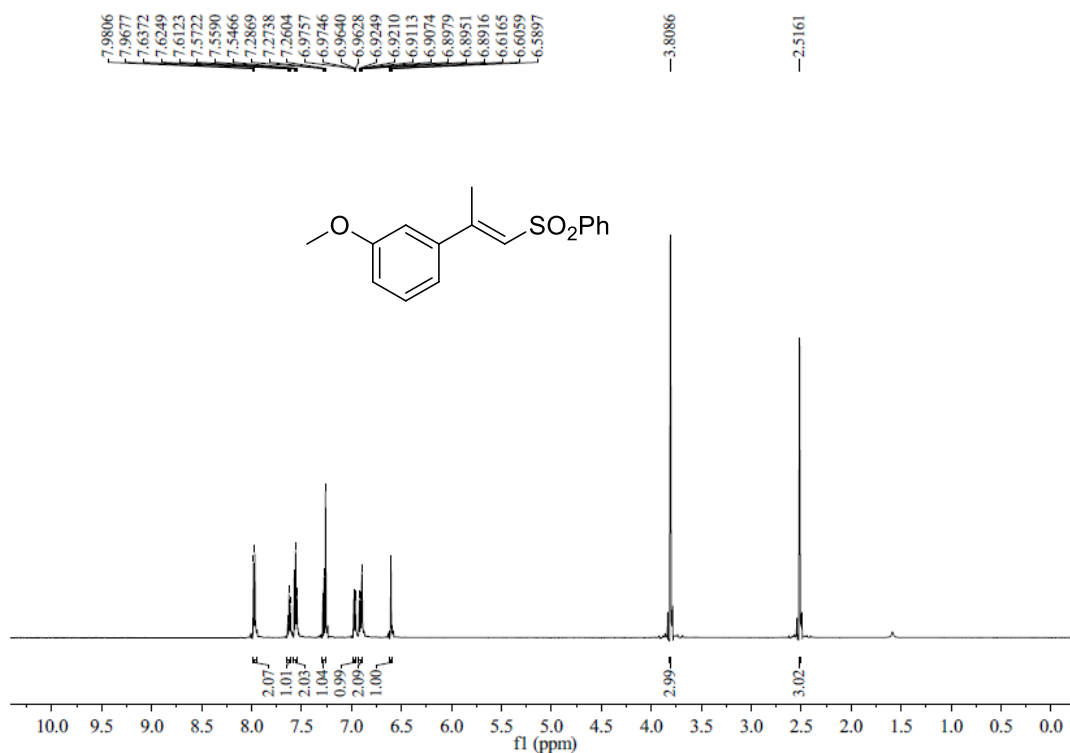

<sup>1</sup>H NMR (600 MHz, Chloroform-*d*)

(*E*)-1-methyl-4-(1-(phenylsulfonyl)prop-1-en-2-yl)benzene (**1j**)

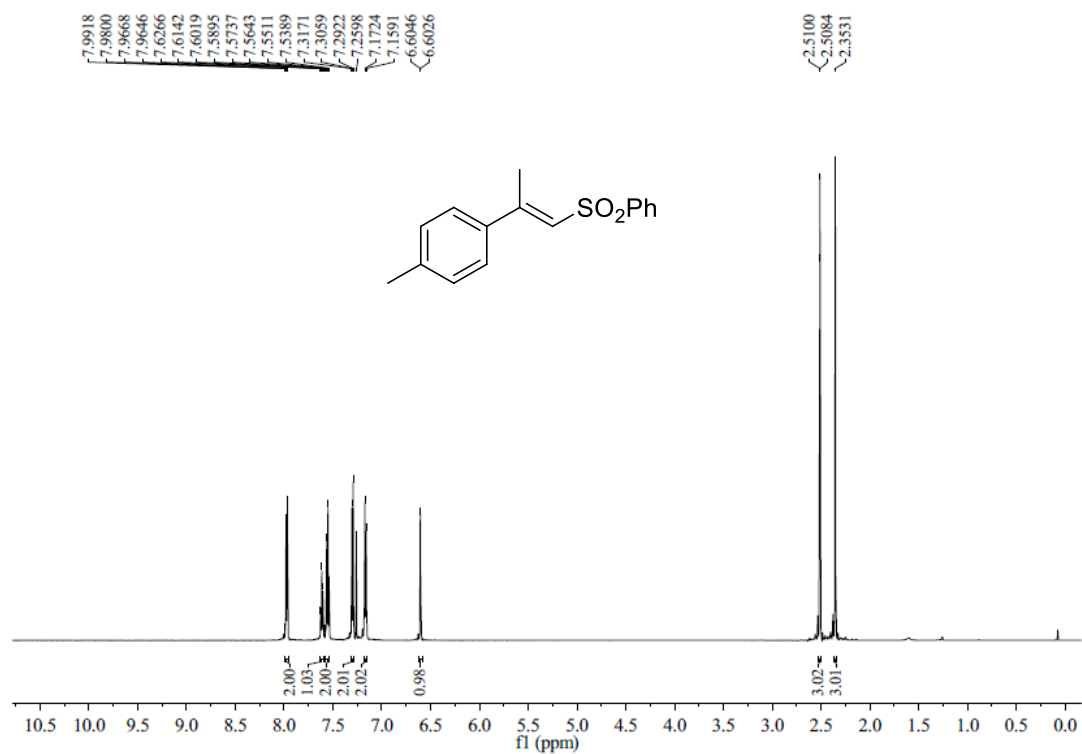

<sup>1</sup>H NMR (600 MHz, Chloroform-*d*)

(*E*)-1-methyl-2-(1-(phenylsulfonyl)prop-1-en-2-yl)benzene (**1k**)

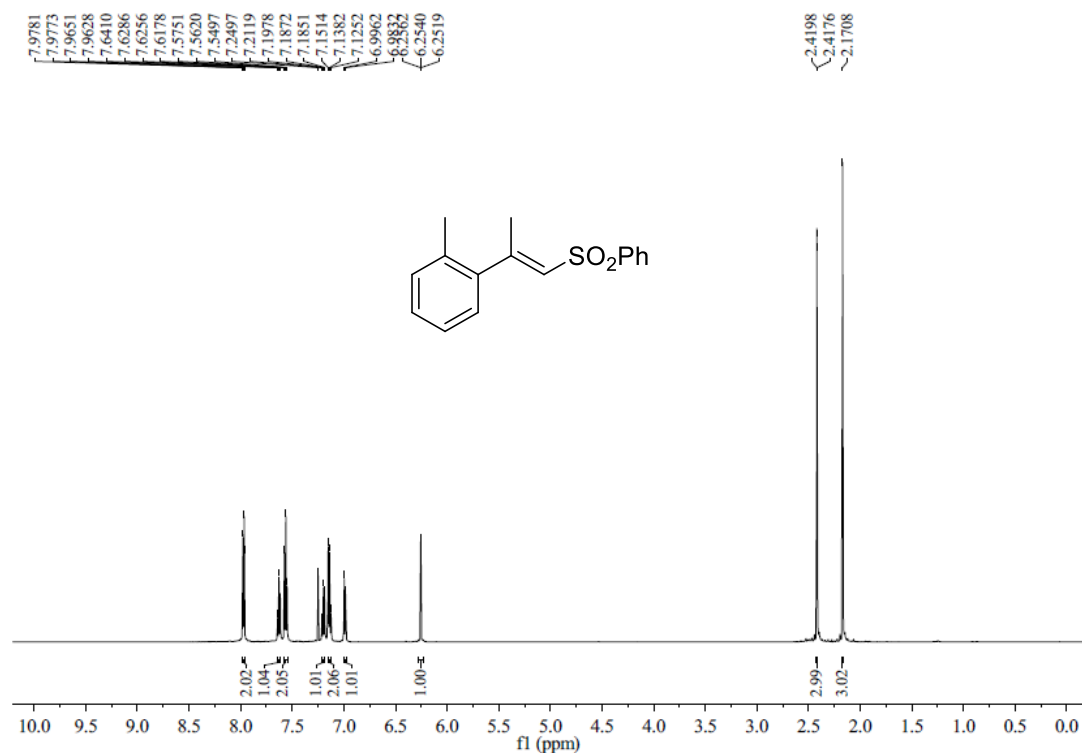

<sup>1</sup>H NMR (600 MHz, Chloroform-*d*)

*(E)*-((2-phenylprop-1-en-1-yl)sulfonyl)benzene (**1l**)

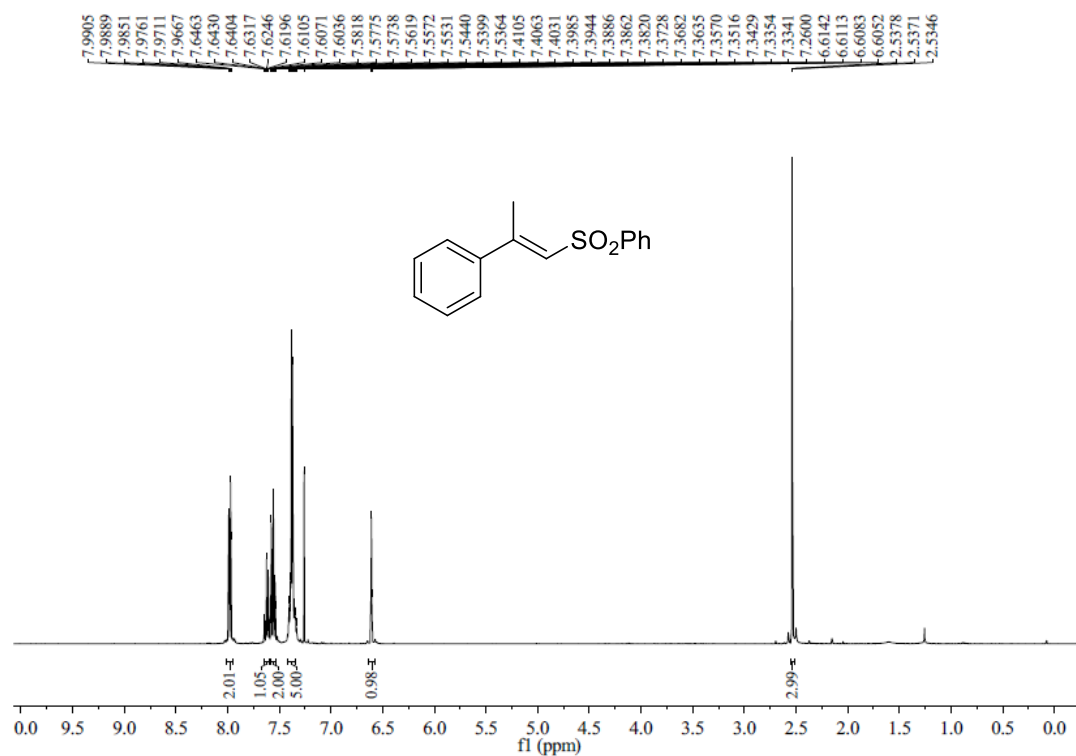

<sup>1</sup>H NMR (400 MHz, Chloroform-*d*)

*(E)*-((2-phenylbut-1-en-1-yl)sulfonyl)benzene (**1m**)

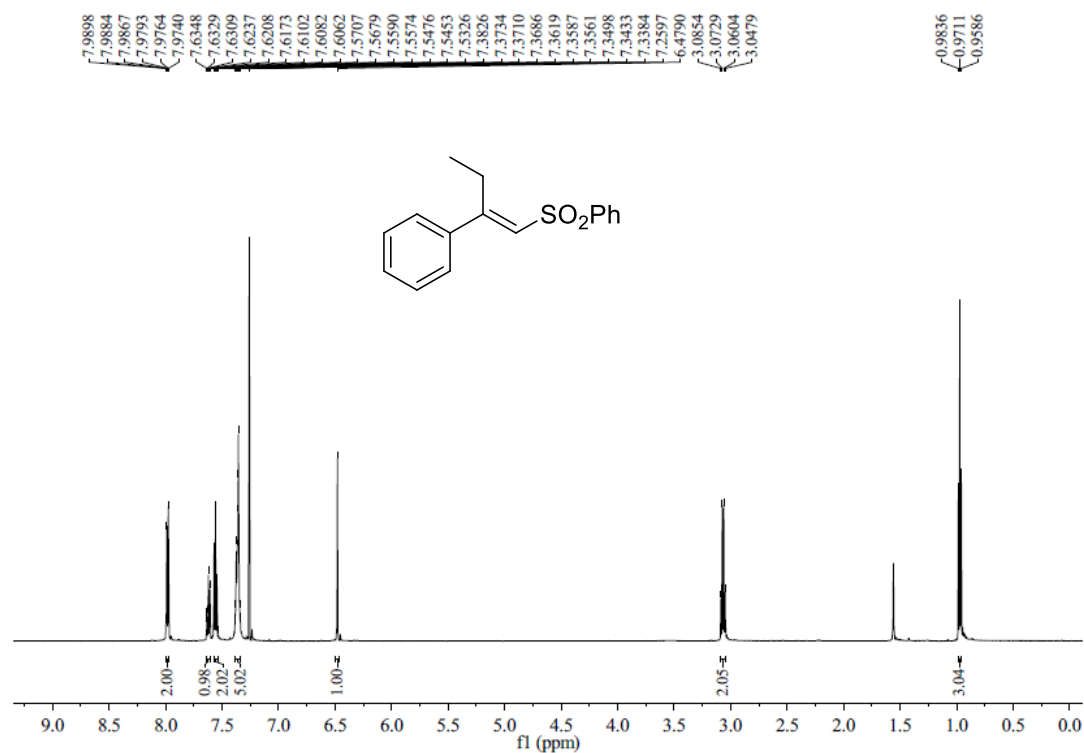

<sup>1</sup>H NMR (600 MHz, Chloroform-*d*)

(*E*)-(1-cyclohexyl-2-(phenylsulfonyl)vinyl)benzene (**1n**)

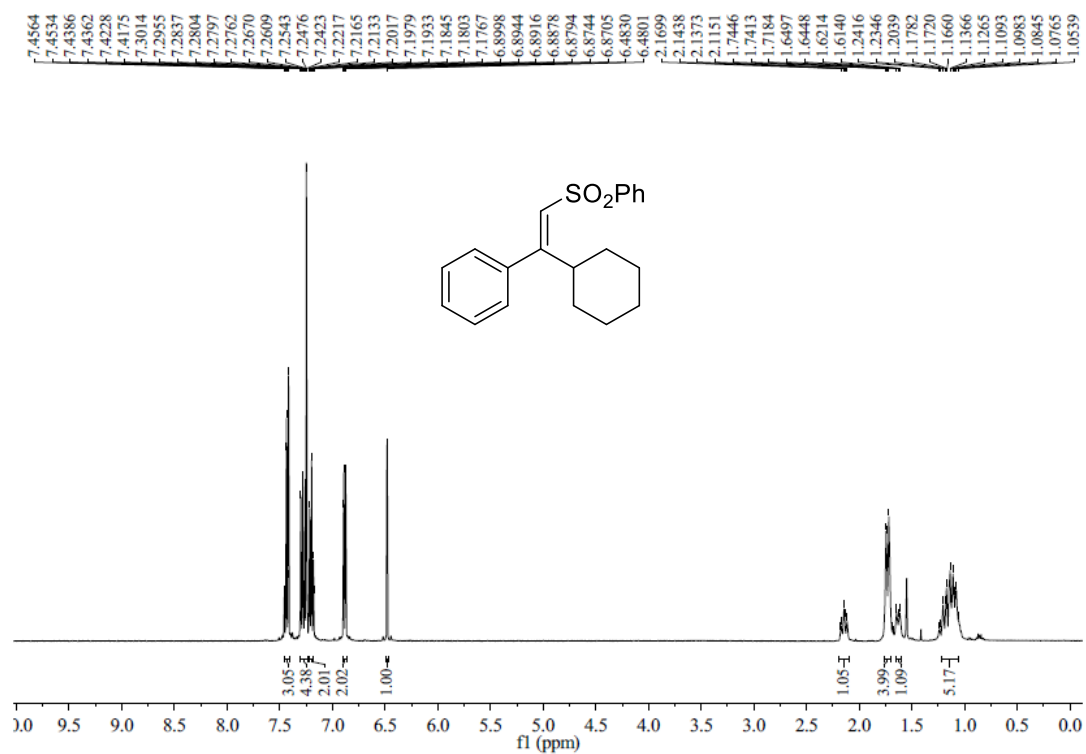

<sup>1</sup>H NMR (400 MHz, Chloroform-*d*)

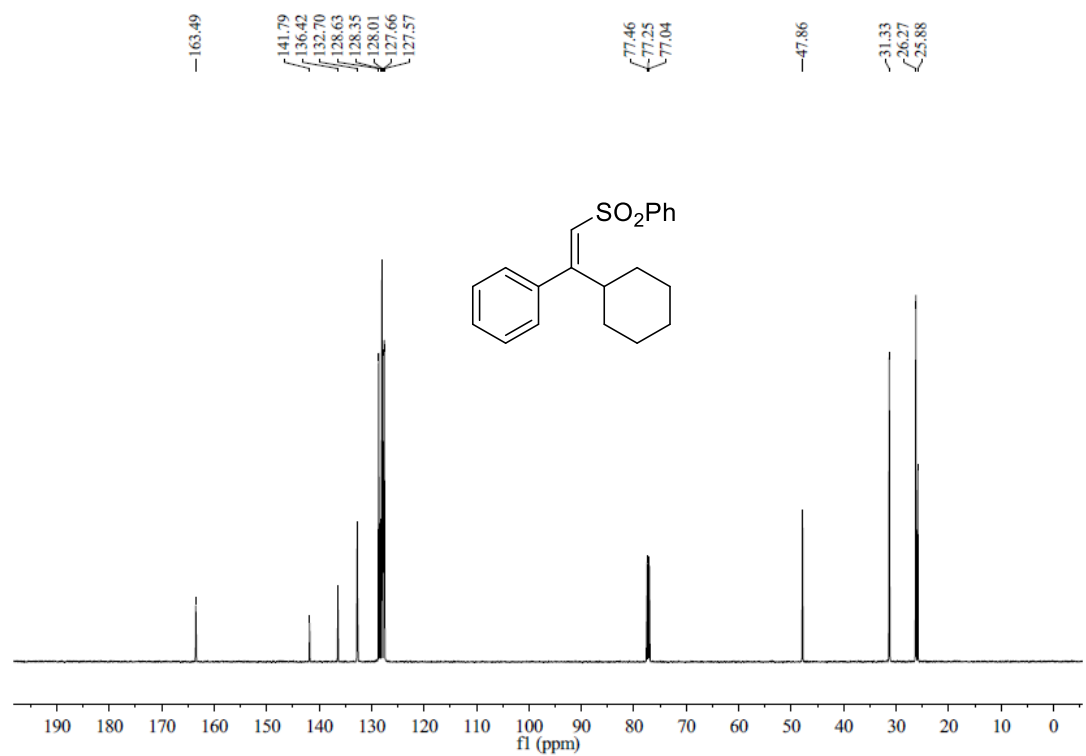

<sup>13</sup>C NMR (150 MHz, Chloroform-*d*)

*(E)*-1-(1-(phenylsulfonyl)prop-1-en-2-yl)naphthalene (**1o**)

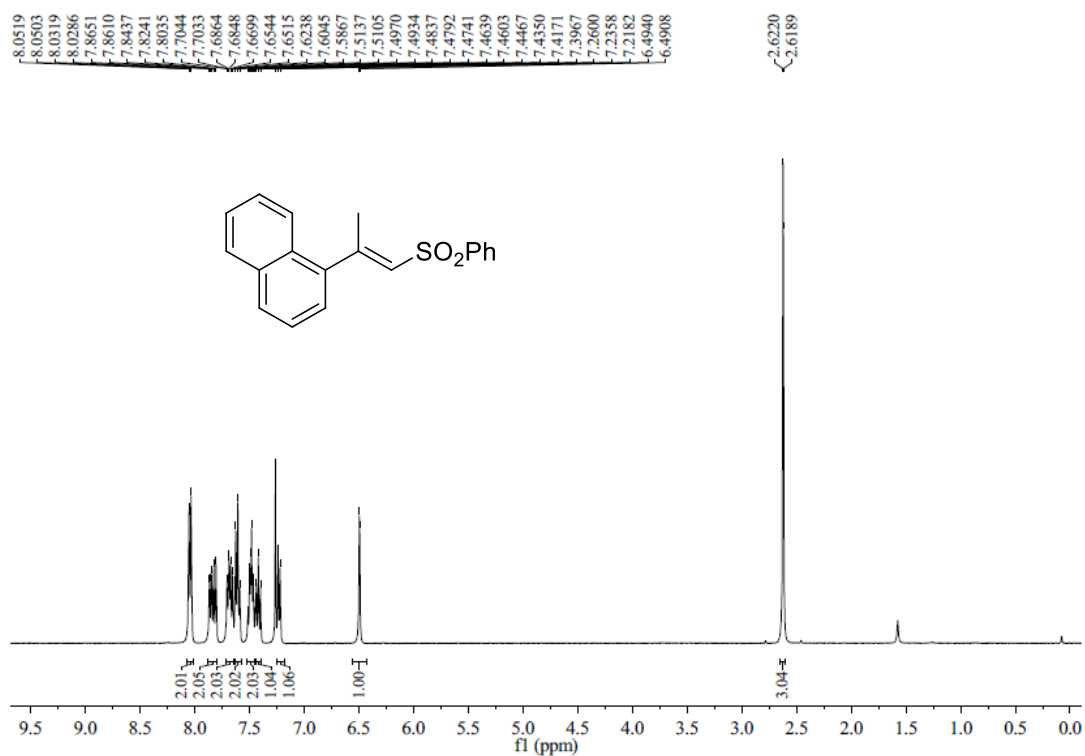

<sup>1</sup>H NMR (400 MHz, Chloroform-*d*)

*(E)*-2-(1-(phenylsulfonyl)prop-1-en-2-yl)naphthalene (**1p**)

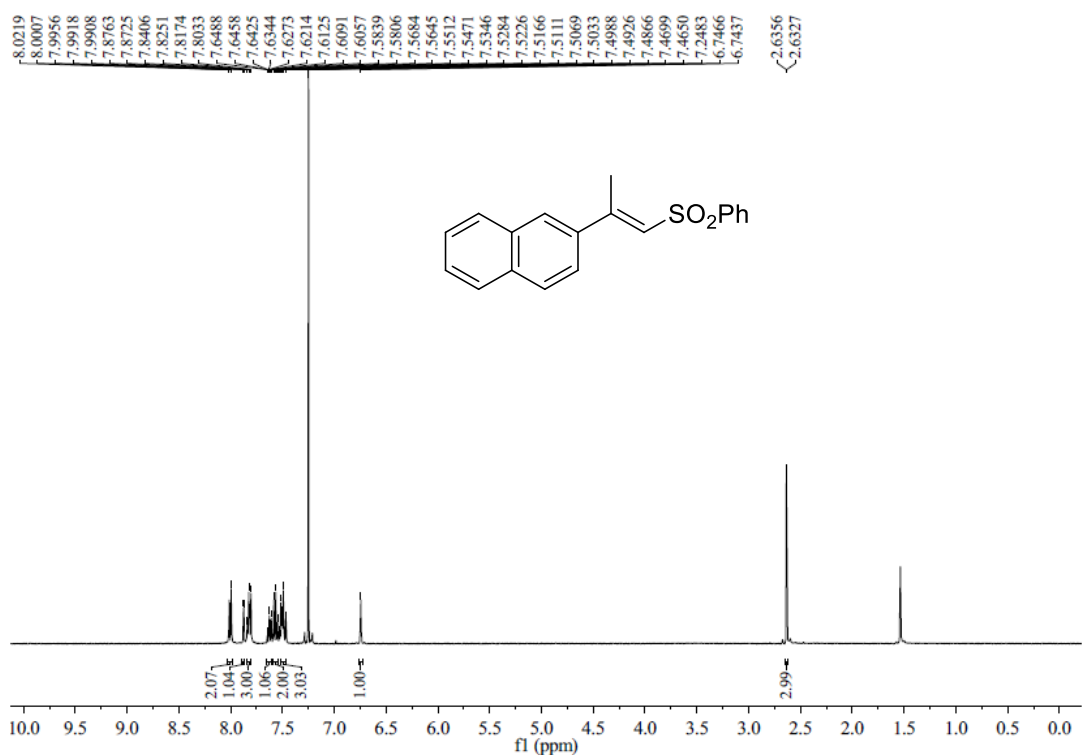

<sup>1</sup>H NMR (400 MHz, Chloroform-*d*)

(Z)-((2-phenylprop-1-en-1-yl)sulfonyl)benzene (**1q**)

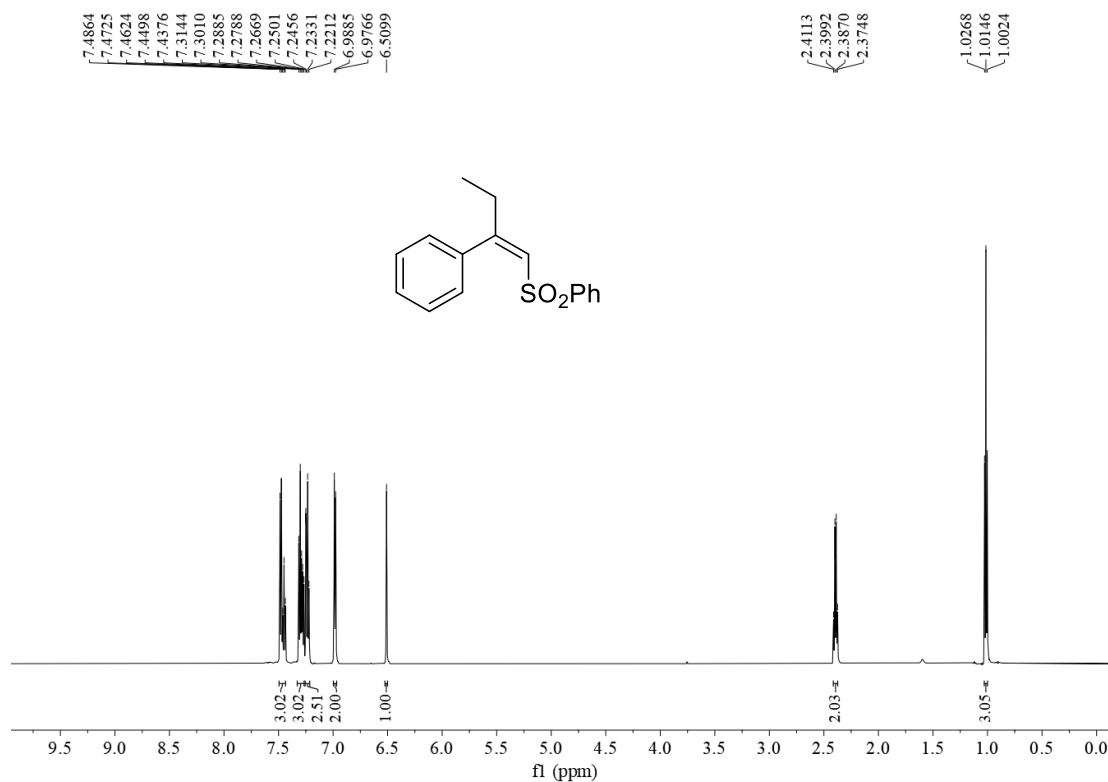

<sup>1</sup>H NMR (400 MHz, Chloroform-*d*)

(E)-1-fluoro-4-((2-phenylprop-1-en-1-yl)sulfonyl)benzene (**1r**)

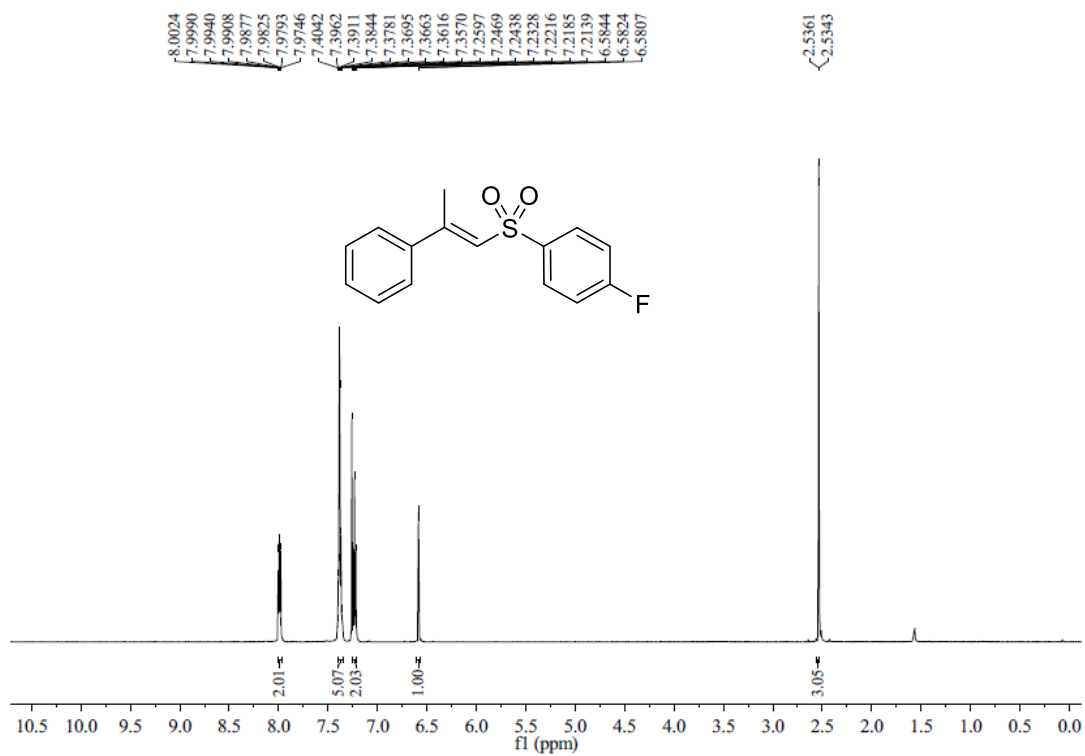

<sup>1</sup>H NMR (600 MHz, Chloroform-*d*)

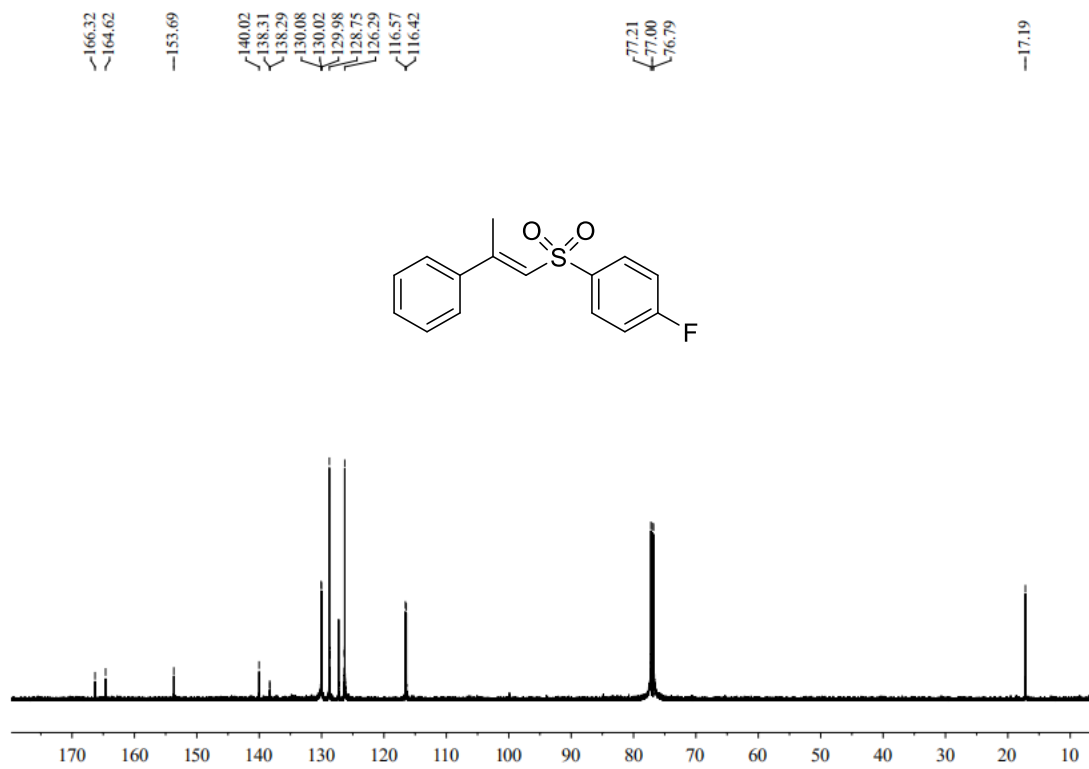

$^{13}\text{C}$  NMR (150 MHz, Chloroform-*d*)  
*(E)*-1-chloro-4-((2-phenylprop-1-en-1-yl)sulfonyl)benzene (**1s**)

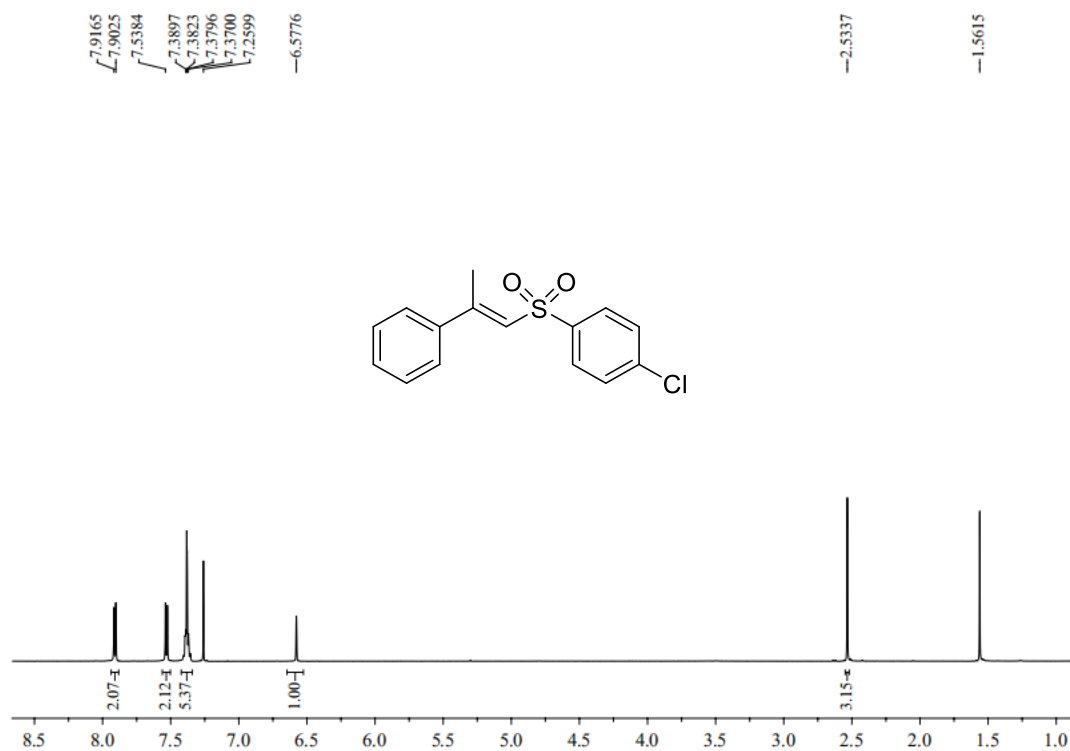

$^1\text{H}$  NMR (600 MHz, Chloroform-*d*)



(E)-3-(1-(phenylsulfonyl)prop-1-en-2-yl)pyridine (**1t**)

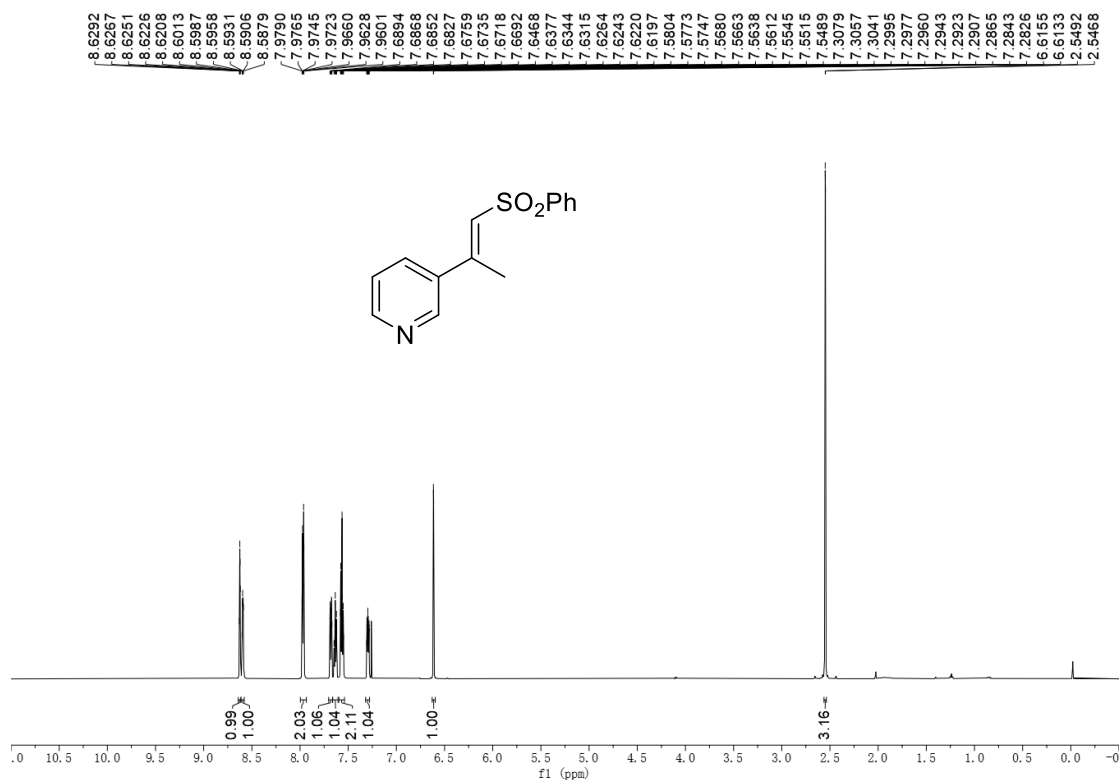

<sup>1</sup>H NMR (600 MHz, Chloroform-*d*)

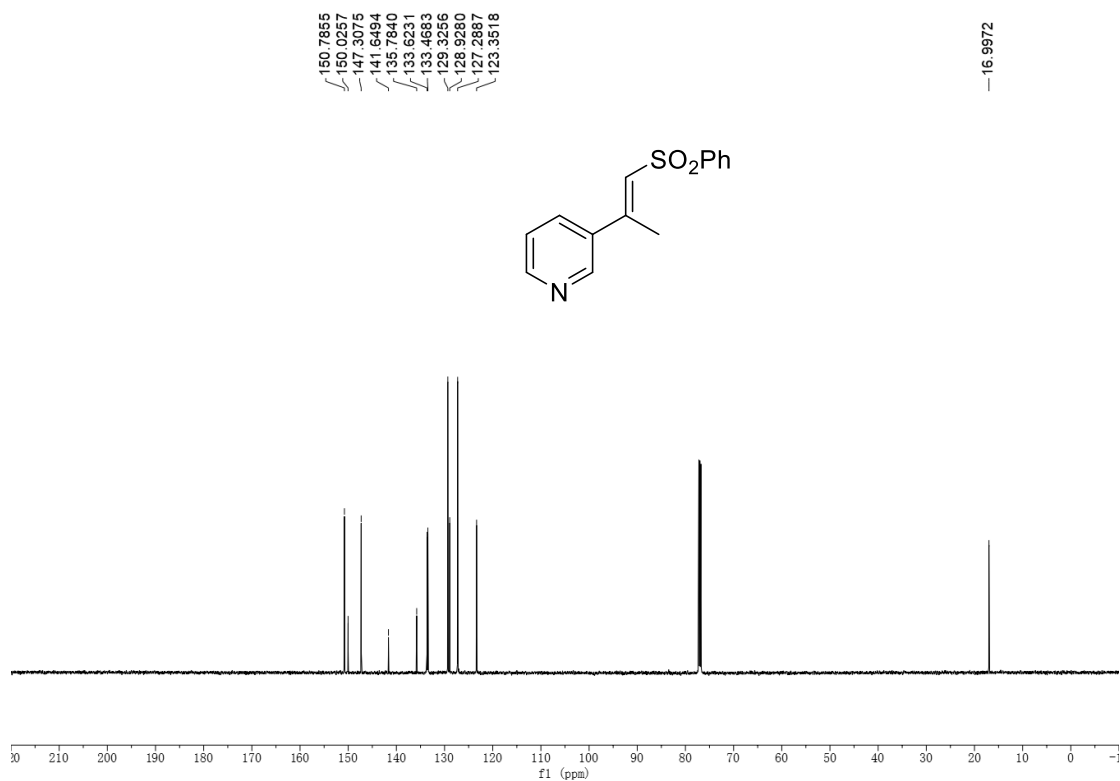

<sup>13</sup>C NMR (151 MHz, Chloroform-*d*)

(E)-1-fluoro-3-(1-phenyl-2-(phenylsulfonyl)vinyl)benzene (**3a**)

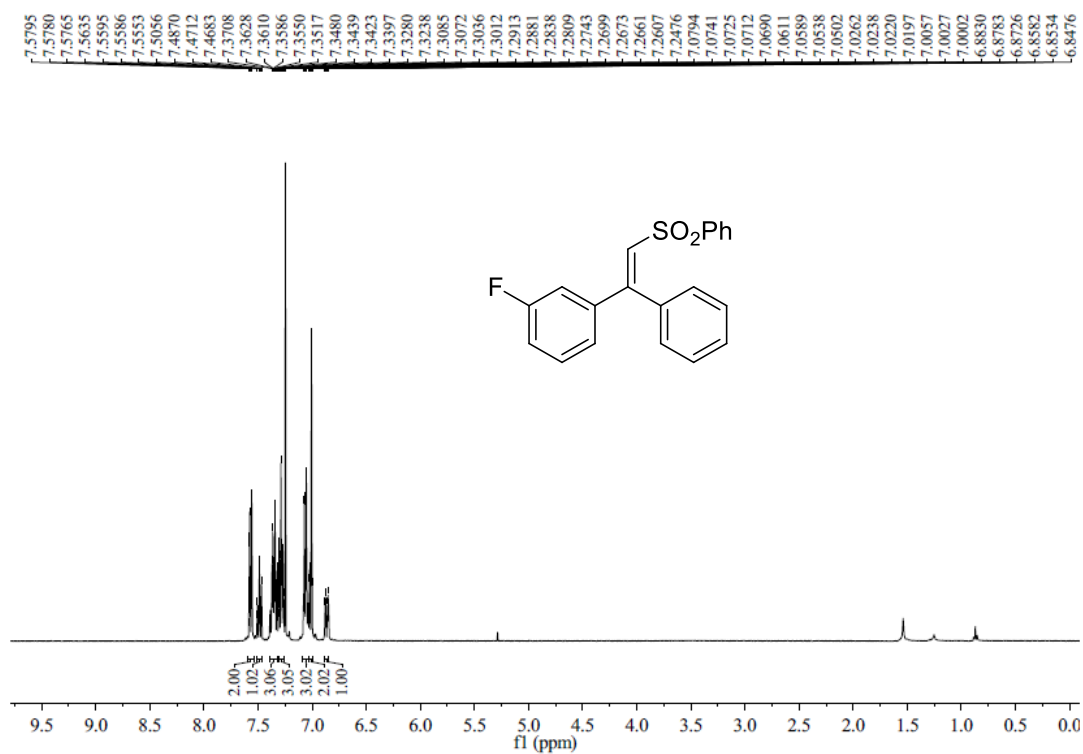

<sup>1</sup>H NMR (400 MHz, Chloroform-*d*)

(Z)-1-fluoro-3-(1-phenyl-2-(phenylsulfonyl)vinyl)benzene (**3a**)

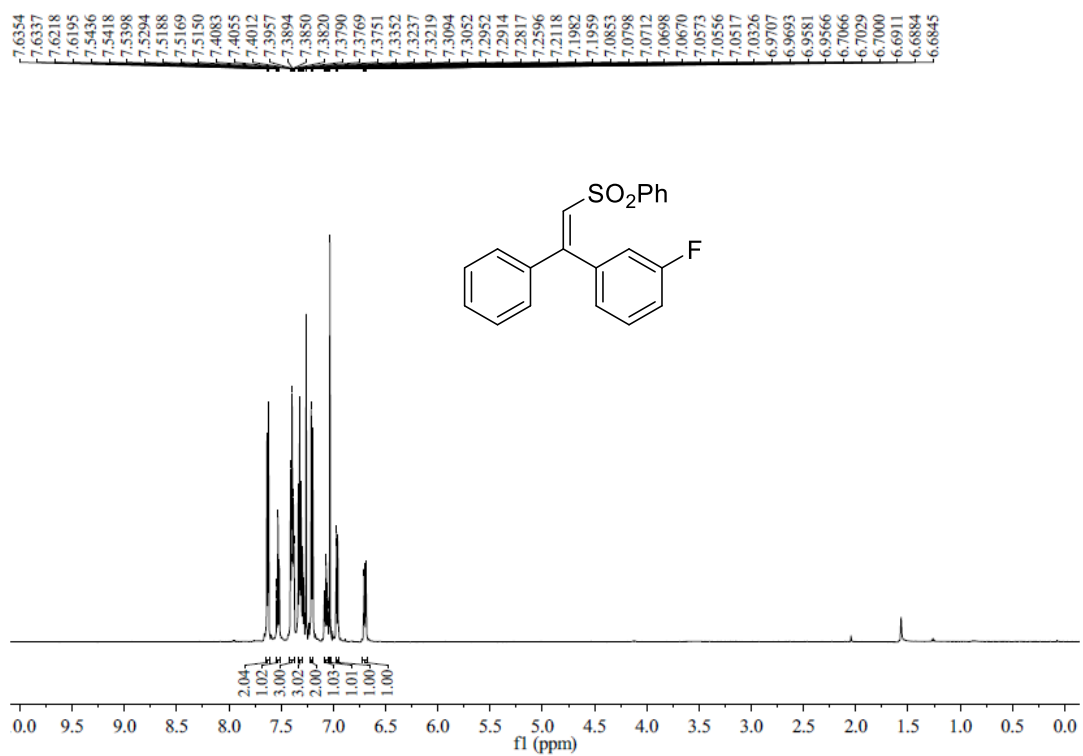

<sup>1</sup>H NMR (600 MHz, Chloroform-*d*)

(*E*)-1-fluoro-4-(1-phenyl-2-(phenylsulfonyl)vinyl)benzene (**3b**)

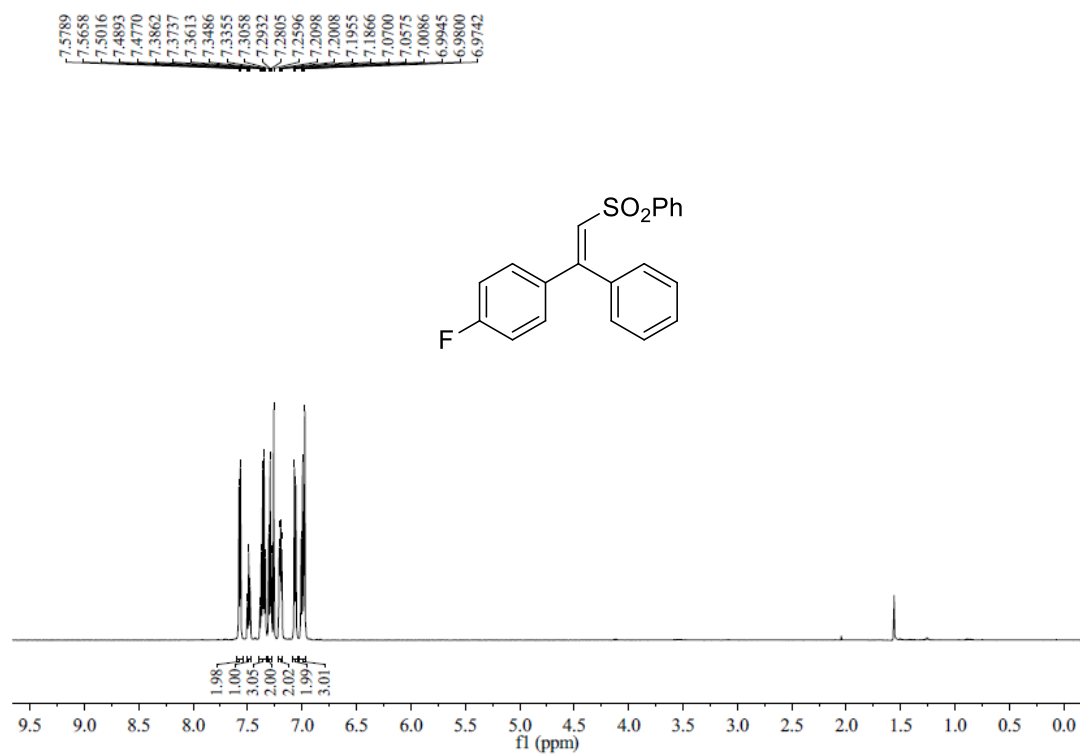

(*E*)-1-chloro-4-(1-phenyl-2-(phenylsulfonyl)vinyl)benzene (**3c**)

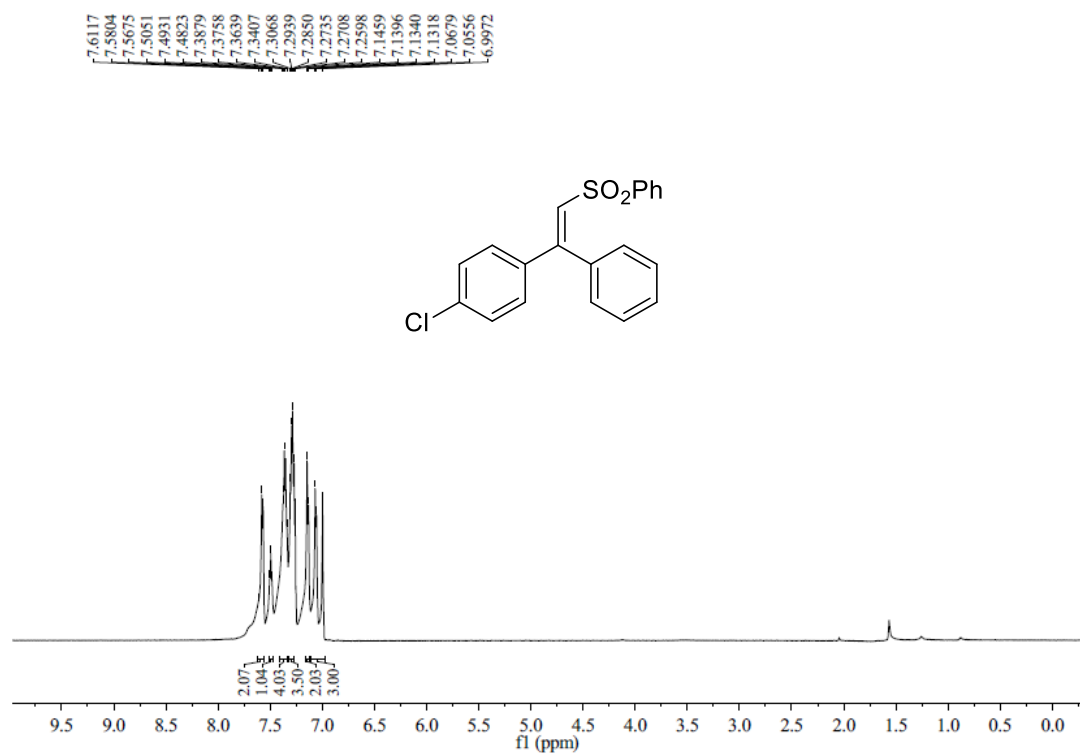

(*E*)-1-methyl-2-(1-phenyl-2-(phenylsulfonyl)vinyl)benzene (**3d**)

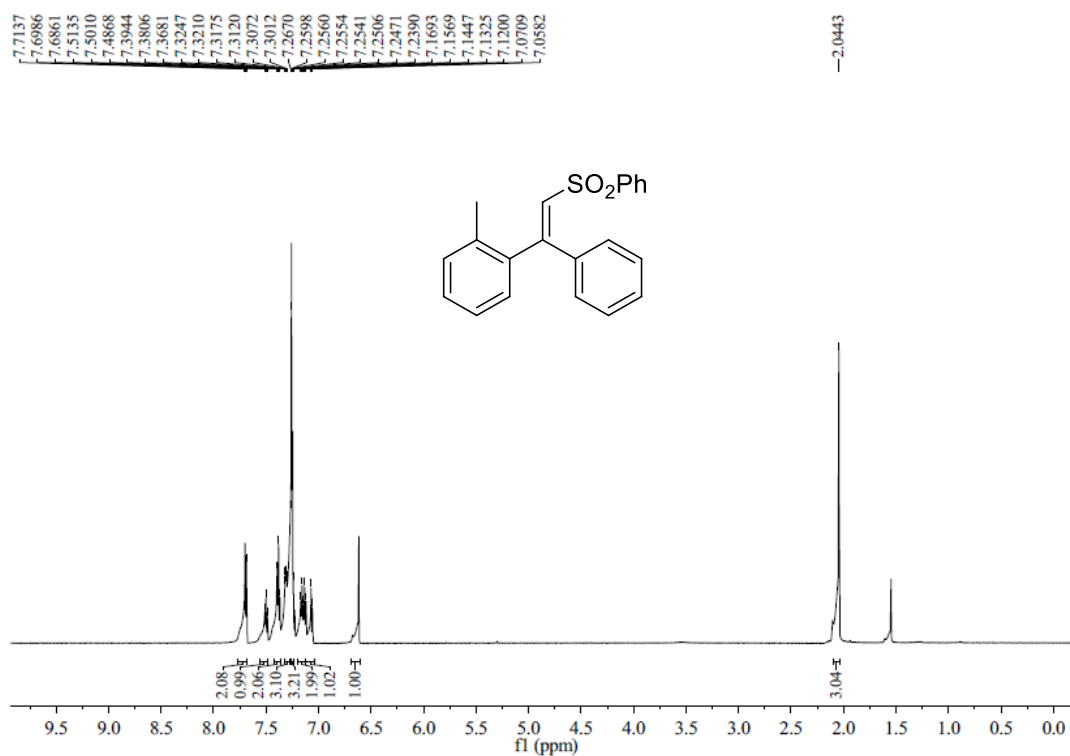

<sup>1</sup>H NMR (600 MHz, Chloroform-*d*)

(*E*)-1-methyl-3-(1-phenyl-2-(phenylsulfonyl)vinyl)benzene (**3e**)

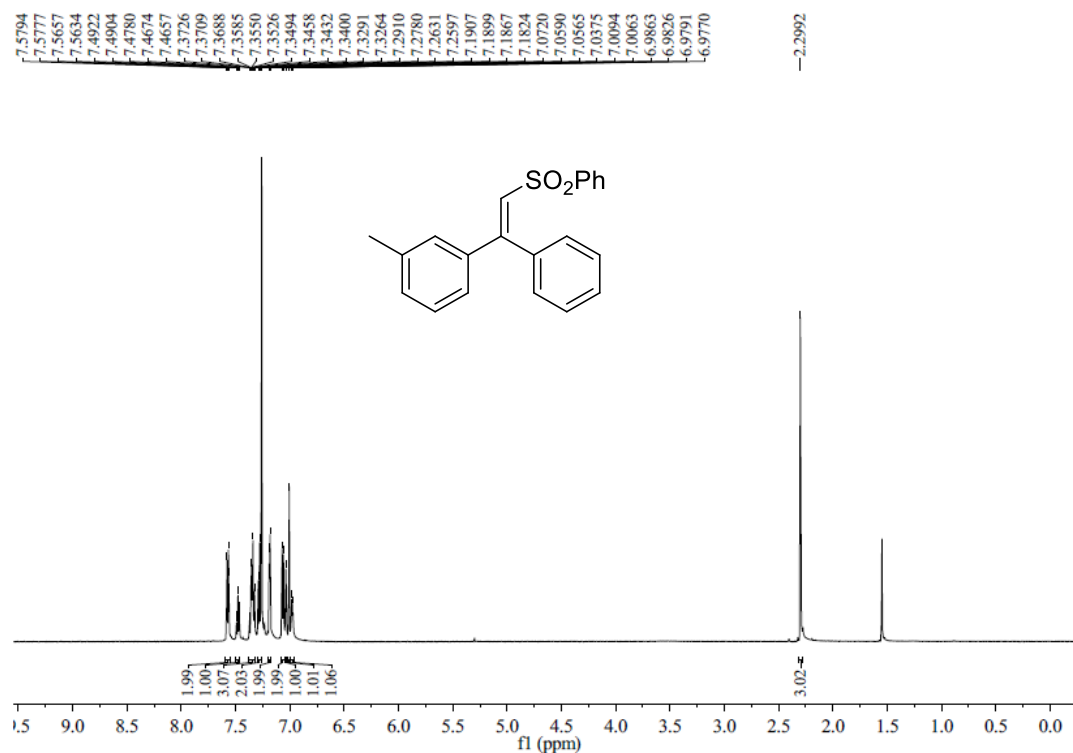

<sup>1</sup>H NMR (600 MHz, Chloroform-*d*)

(*E*)-1-methyl-4-(1-phenyl-2-(phenylsulfonyl)vinyl)benzene (**3f**)

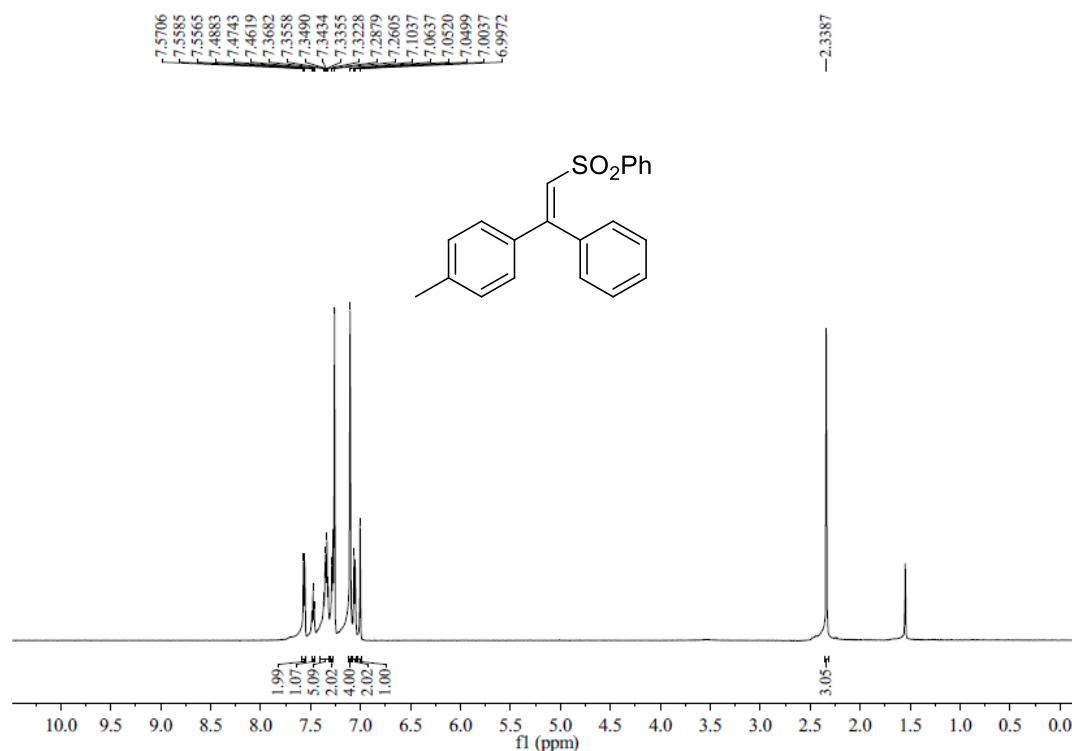

<sup>1</sup>H NMR (600 MHz, Chloroform-*d*)

(*E*)-1,2-dichloro-4-(1-phenyl-2-(phenylsulfonyl)vinyl)benzene (**3g**)

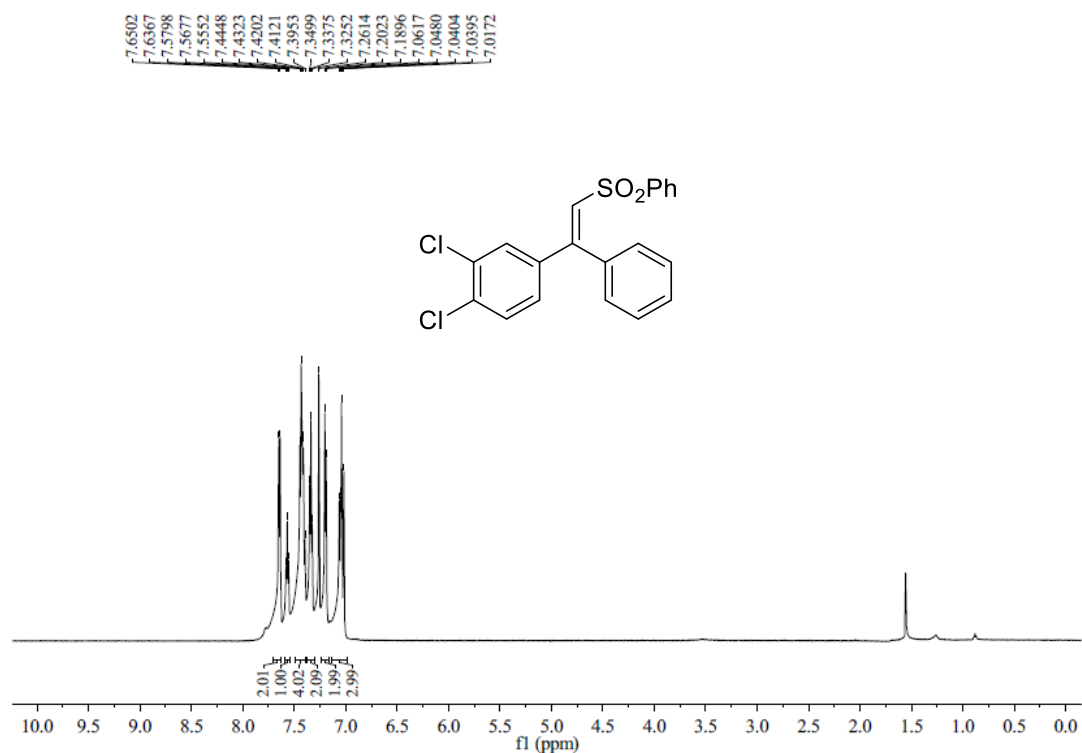

<sup>1</sup>H NMR (600 MHz, Chloroform-*d*)

(*E*)-1,3-dimethyl-5-(1-phenyl-2-(phenylsulfonyl)vinyl)benzene (**3h**)

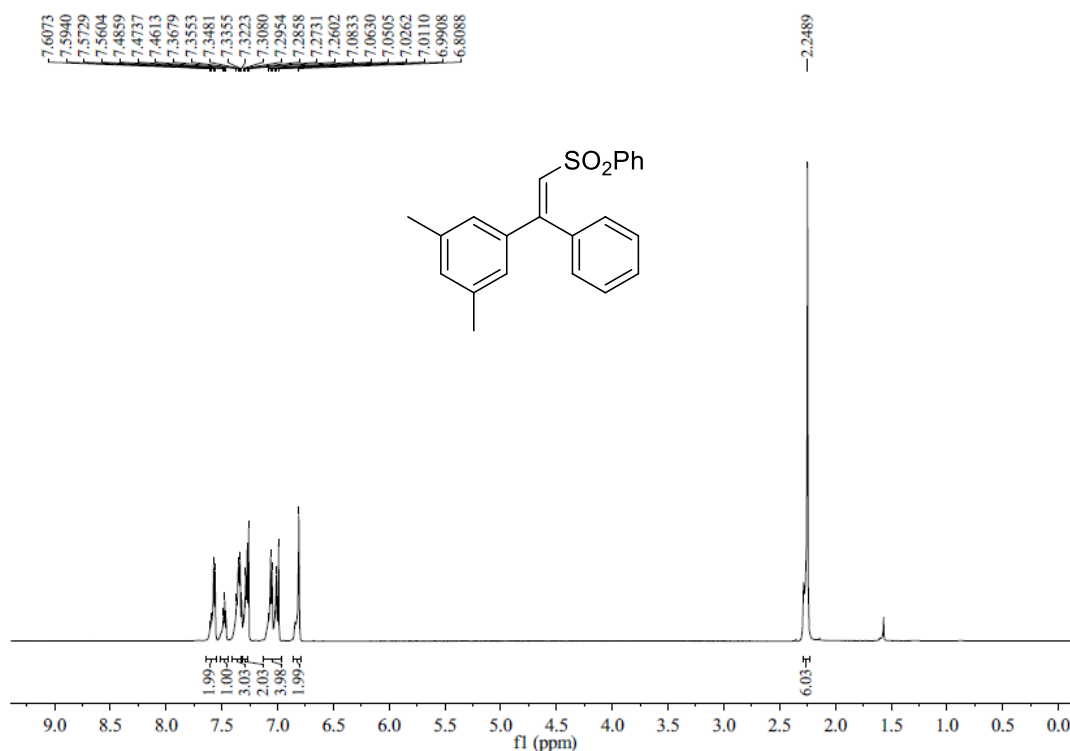

<sup>1</sup>H NMR (600 MHz, Chloroform-*d*)

(*E*)-1-chloro-4-(2-(phenylsulfonyl)-1-(*p*-tolyl)vinyl)benzene (**3i**)

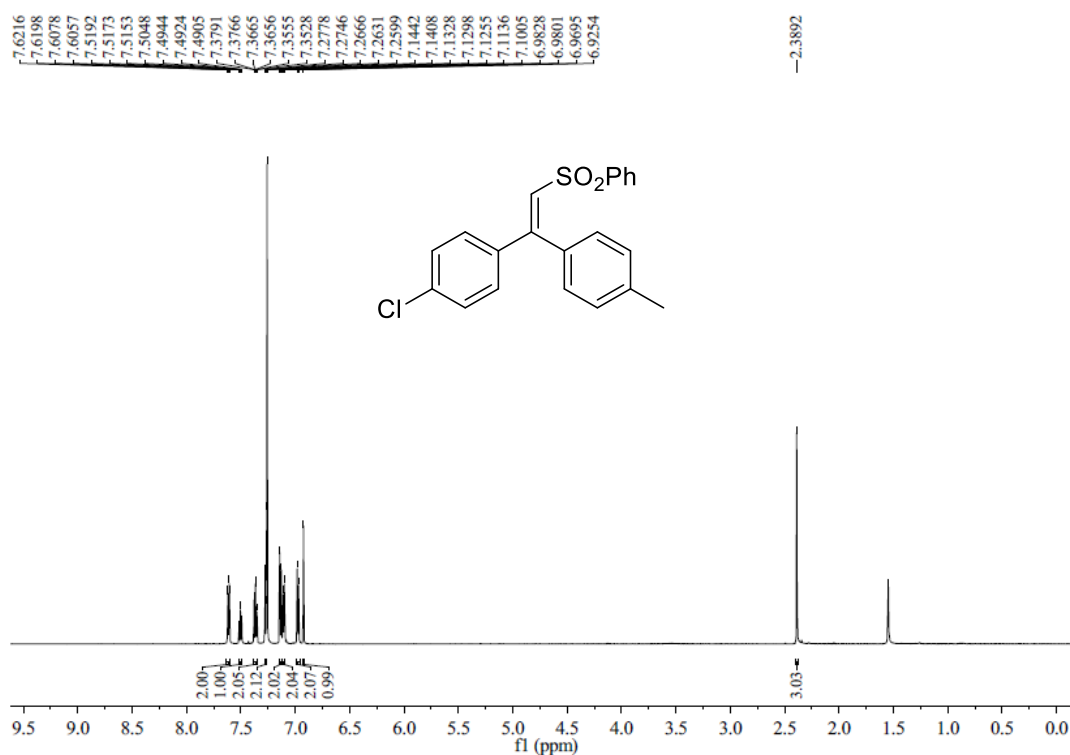

<sup>1</sup>H NMR (600 MHz, Chloroform-*d*)

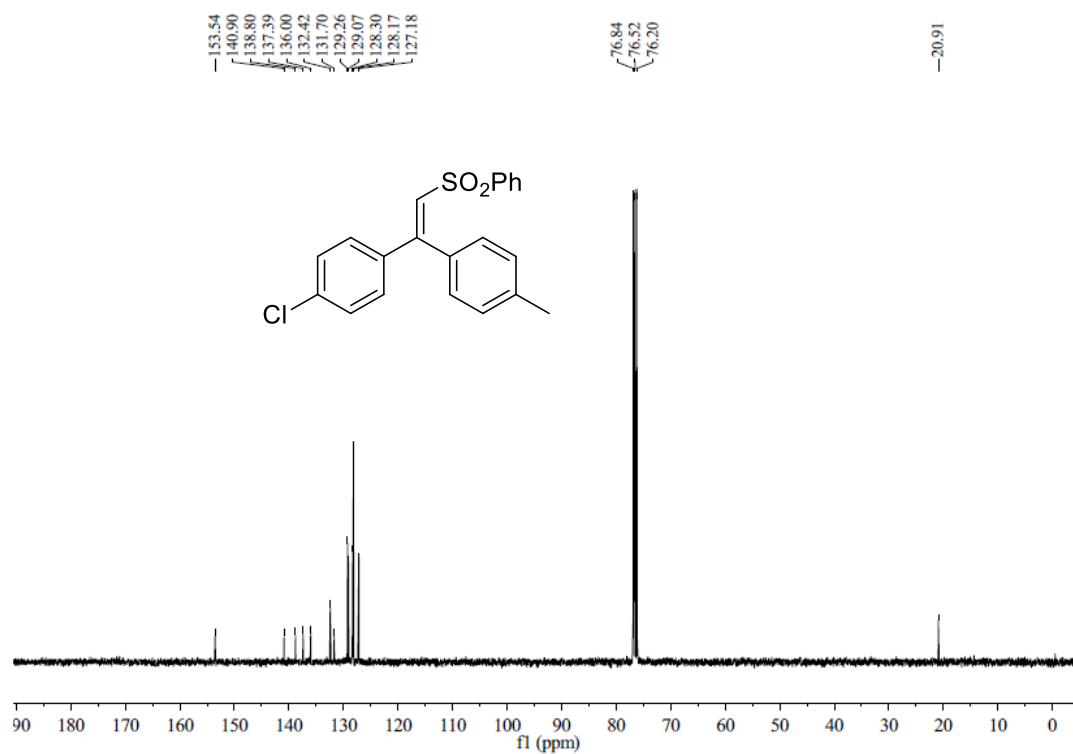

$^{13}\text{C}$  NMR (100 MHz, Chloroform-*d*)

(*E*)-1-fluoro-4-(2-(phenylsulfonyl)-1-(*p*-tolyl)vinyl)benzene (**3j**)

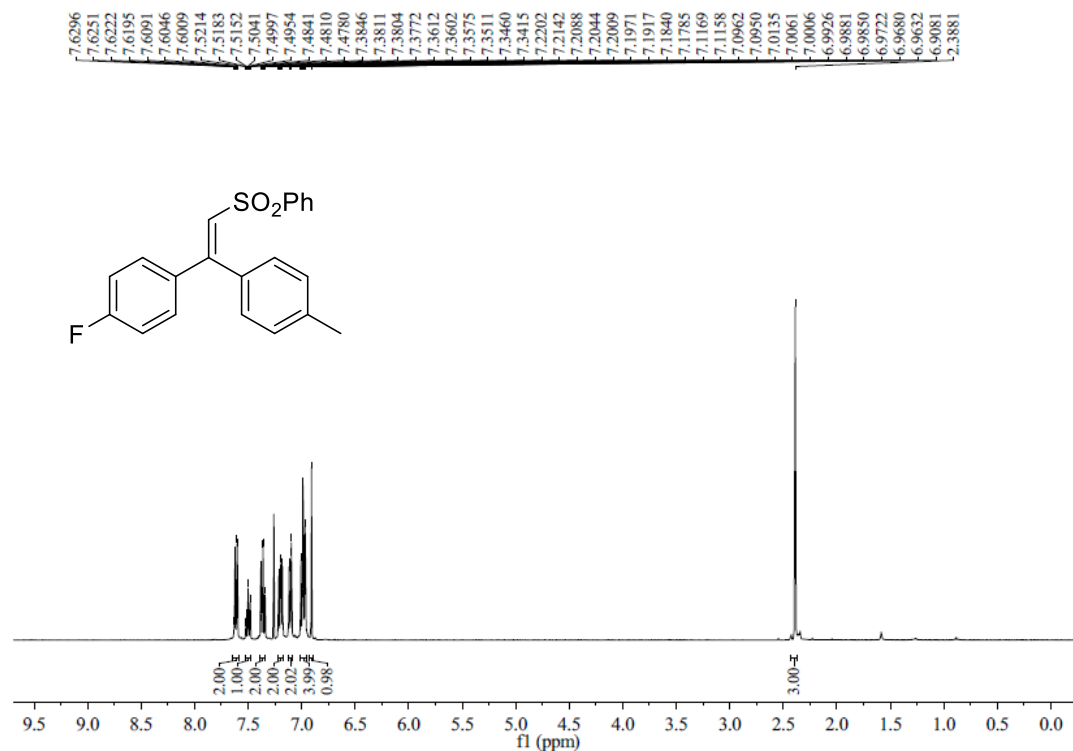

$^1\text{H}$  NMR (400 MHz, Chloroform-*d*)

(*E*)-1-methyl-3-(2-(phenylsulfonyl)-1-(*p*-tolyl)vinyl)benzene (**3k**)

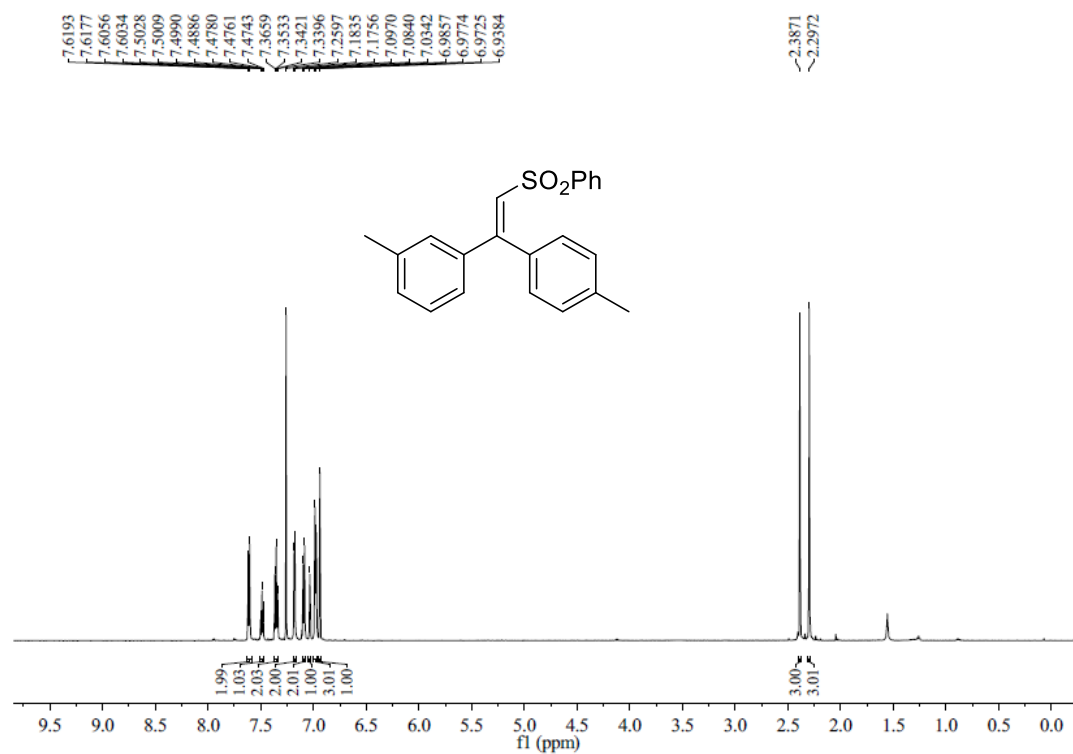

<sup>1</sup>H NMR (600 MHz, Chloroform-*d*)

(*Z*)-1-fluoro-3-(2-(phenylsulfonyl)-1-(*m*-tolyl)vinyl)benzene (**3l**)

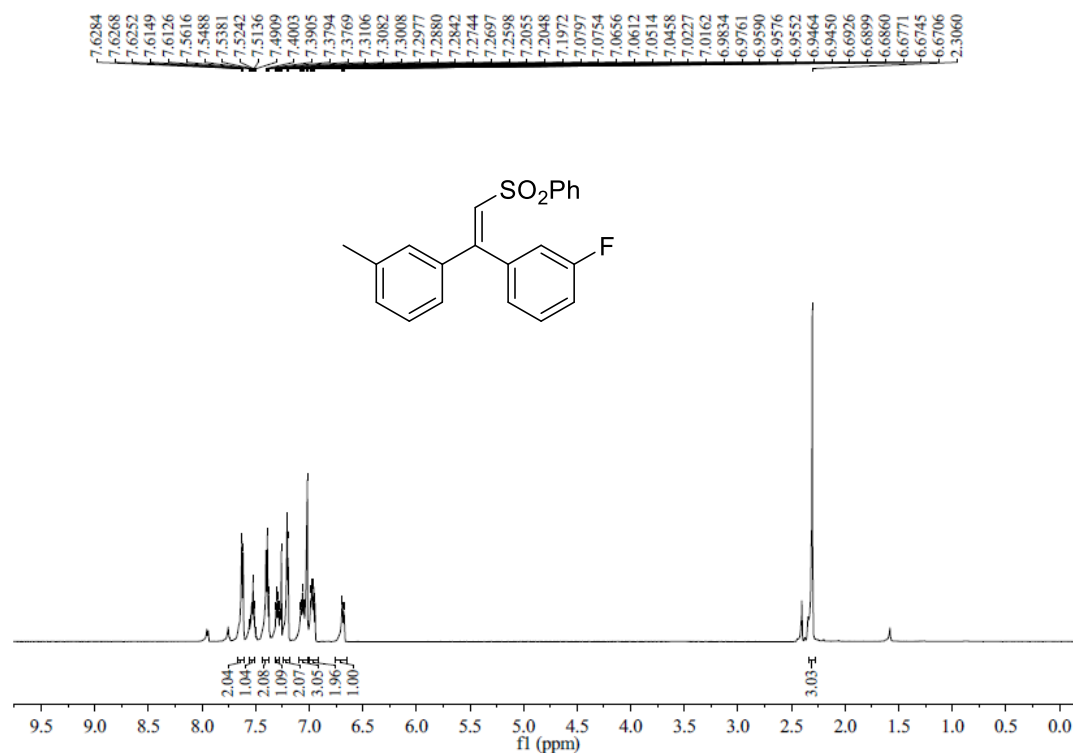

<sup>1</sup>H NMR (600 MHz, Chloroform-*d*)



*(E)*-3-(1-phenyl-2-(phenylsulfonyl)vinyl)pyridine (**3m**)

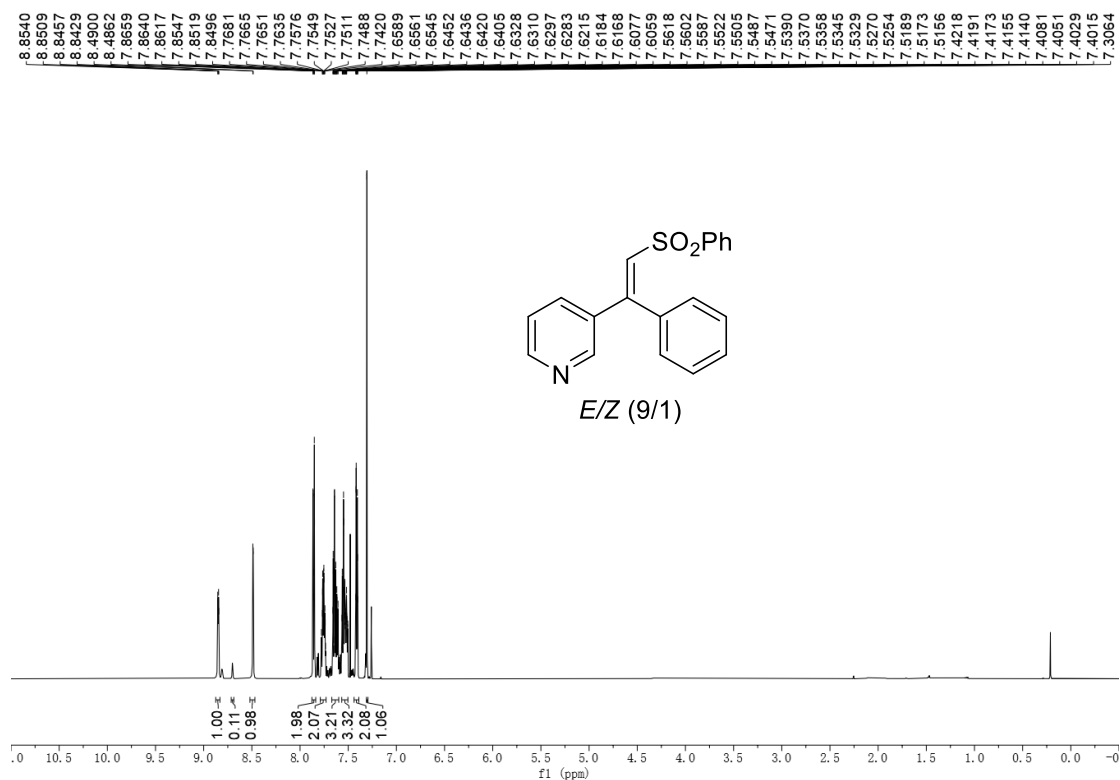

<sup>1</sup>H NMR (600 MHz, Chloroform-*d*)

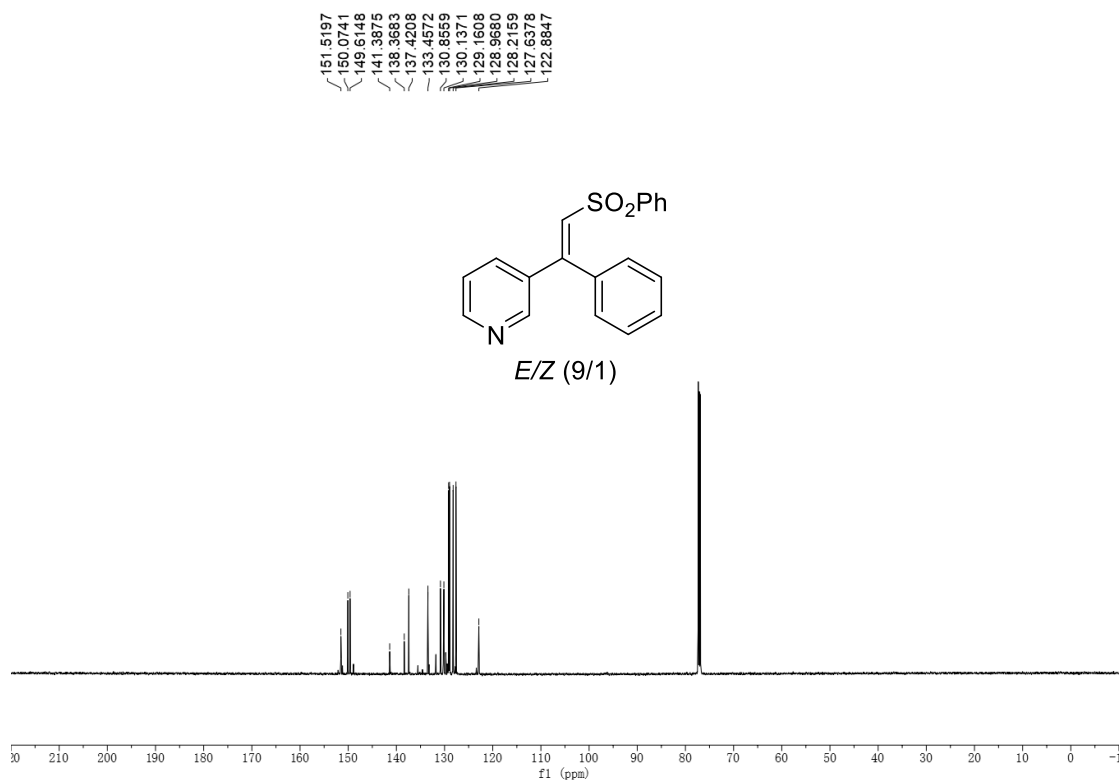

<sup>13</sup>C NMR (151 MHz, Chloroform-*d*)

1-Methyl-4-(2-(methylsulfonyl)-1-phenylvinyl)benzene (**3n**)

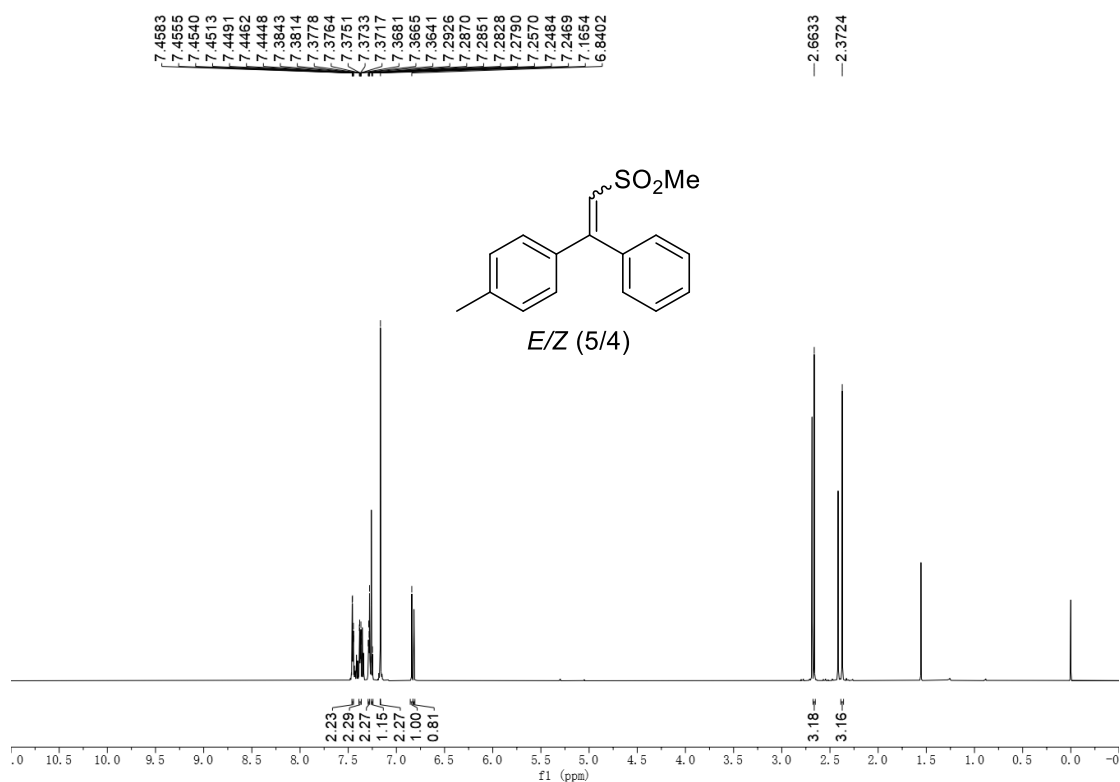

<sup>1</sup>H NMR (600 MHz, Chloroform-*d*)

1-Fluoro-3-(1-(phenylsulfonyl)propan-2-yl)benzene (**2a**)

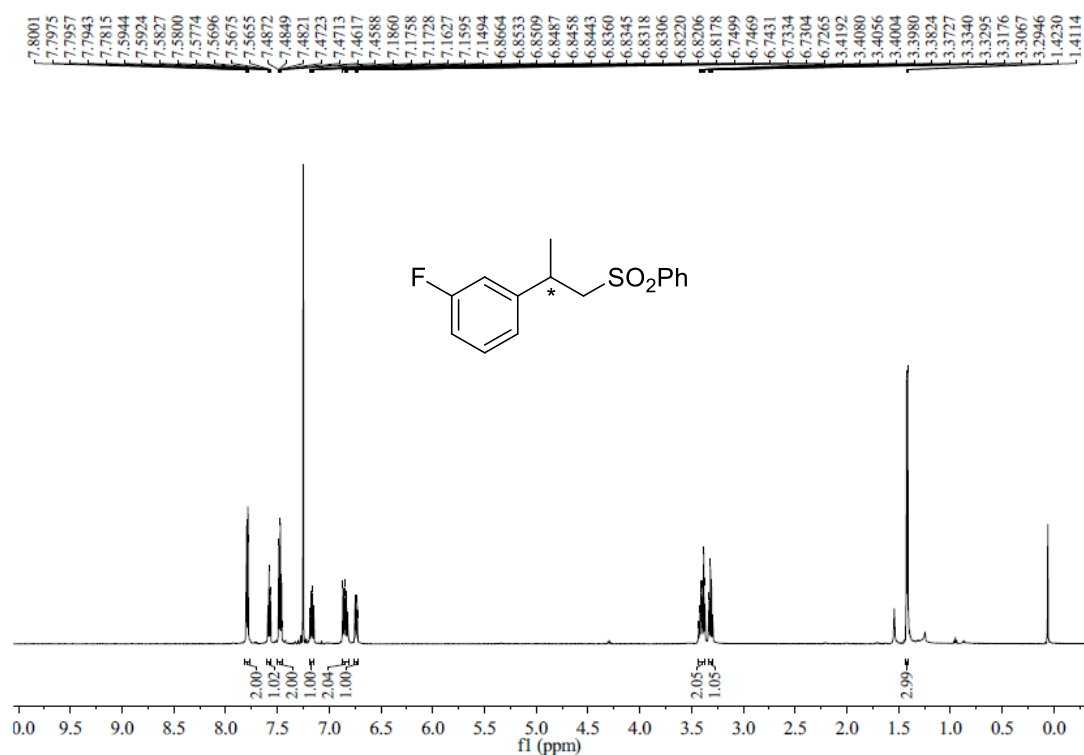

<sup>1</sup>H NMR (600 MHz, Chloroform-*d*)

1-Fluoro-2-(1-(phenylsulfonyl)propan-2-yl)benzene (**2b**)

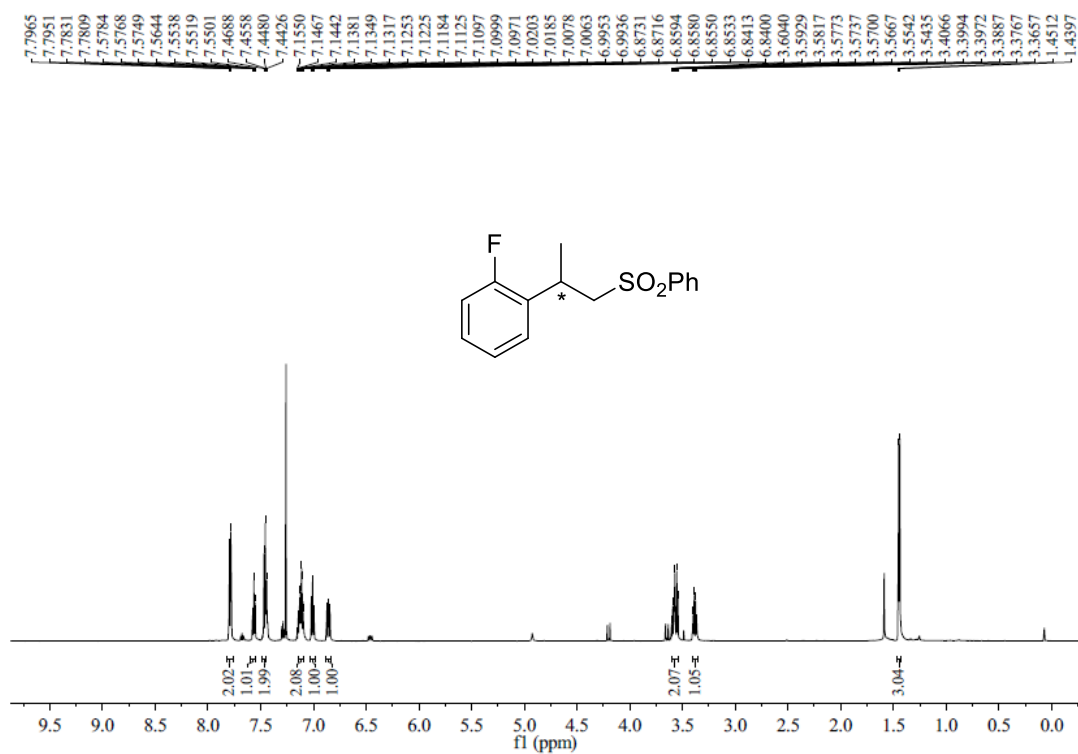

<sup>1</sup>H NMR (600 MHz, Chloroform-*d*)

1-Fluoro-4-(1-(phenylsulfonyl)propan-2-yl)benzene (**2c**)

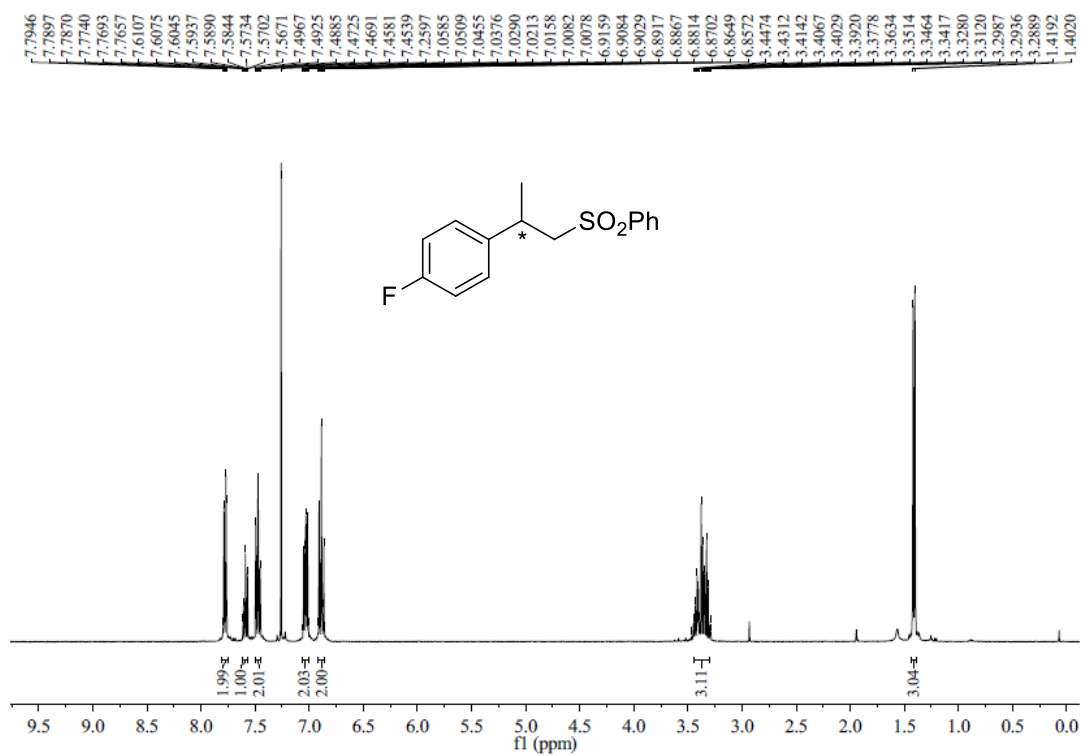

<sup>1</sup>H NMR (400 MHz, Chloroform-*d*)

1-Chloro-3-(1-(phenylsulfonyl)propan-2-yl)benzene (**2d**)

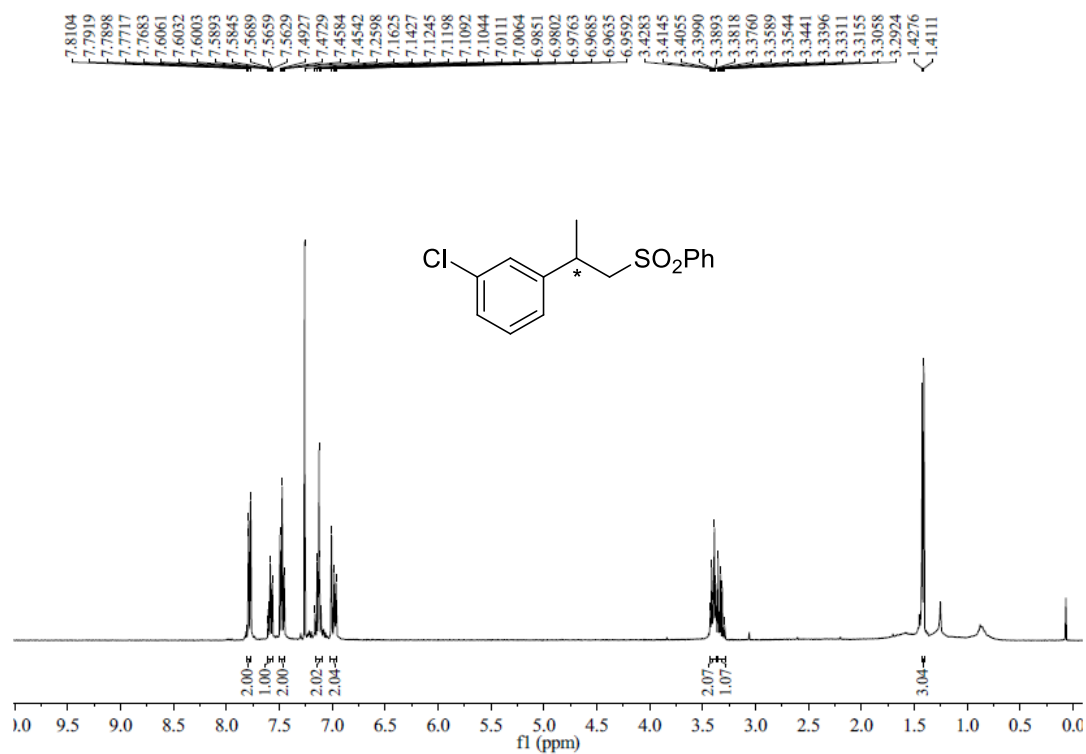

<sup>1</sup>H NMR (400 MHz, Chloroform-*d*)

(*R*)-1-chloro-4-(1-(phenylsulfonyl)propan-2-yl)benzene (**2e**)

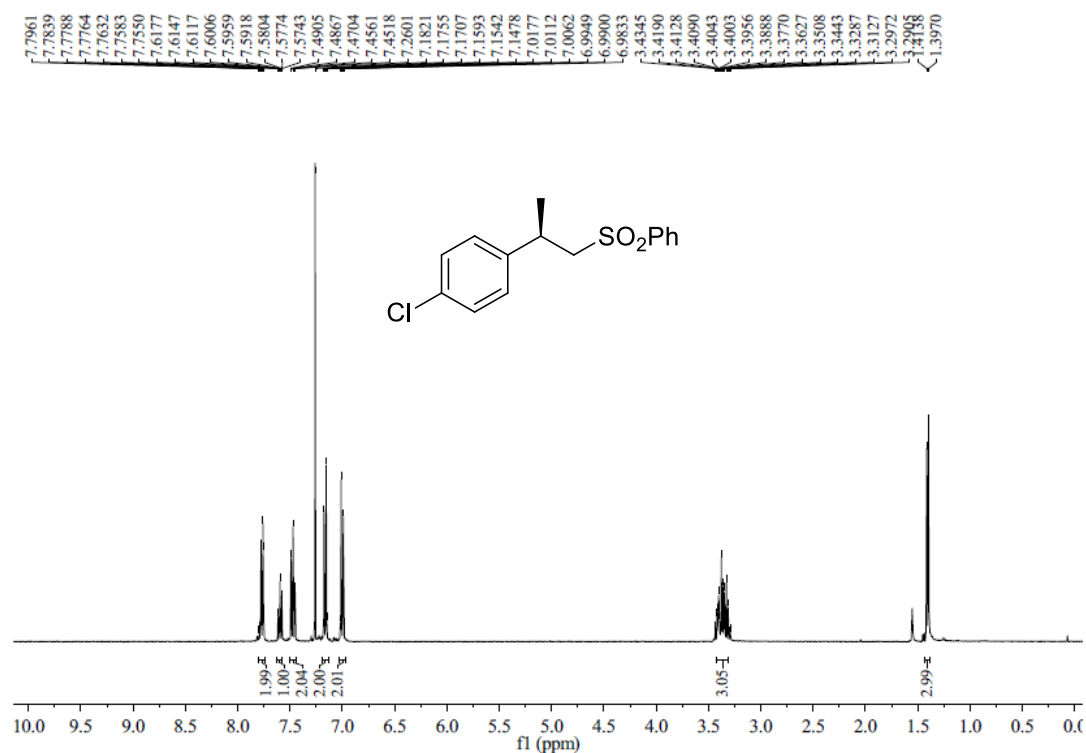

<sup>1</sup>H NMR (400 MHz, Chloroform-*d*)

1-Bromo-3-(1-(phenylsulfonyl)propan-2-yl)benzene (**2f**)

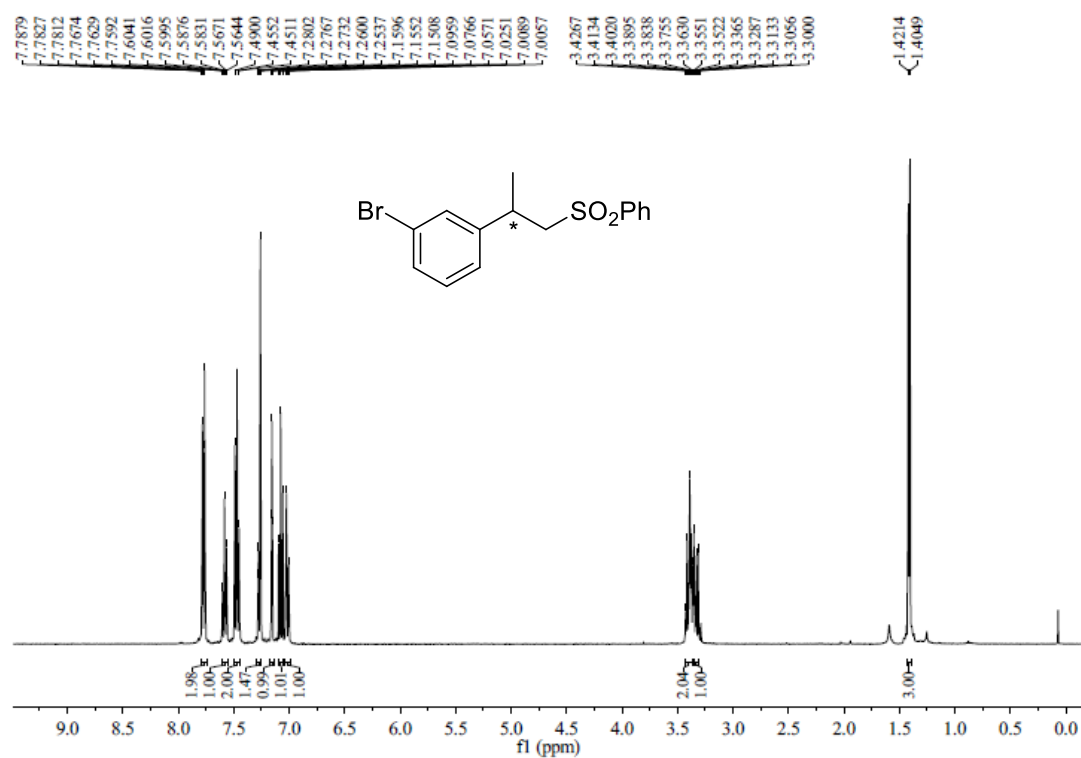

<sup>1</sup>H NMR (400 MHz, Chloroform-*d*)

1-Bromo-4-(1-(phenylsulfonyl)propan-2-yl)benzene (**2g**)

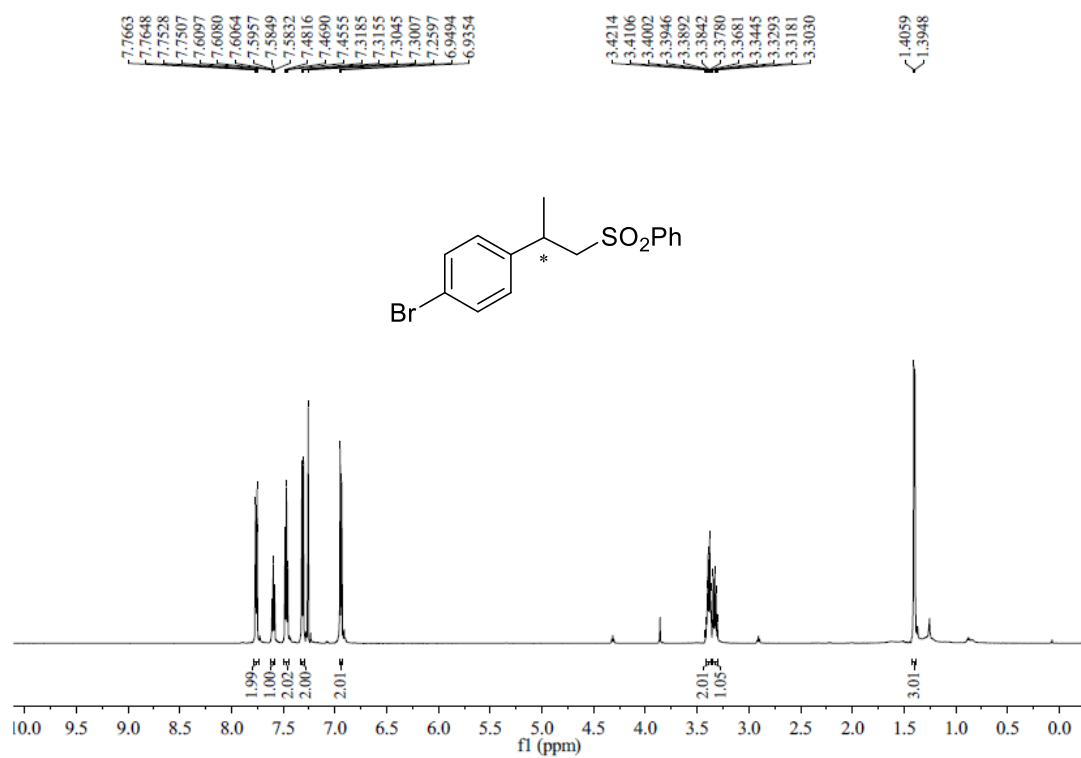

<sup>1</sup>H NMR (600 MHz, Chloroform-*d*)

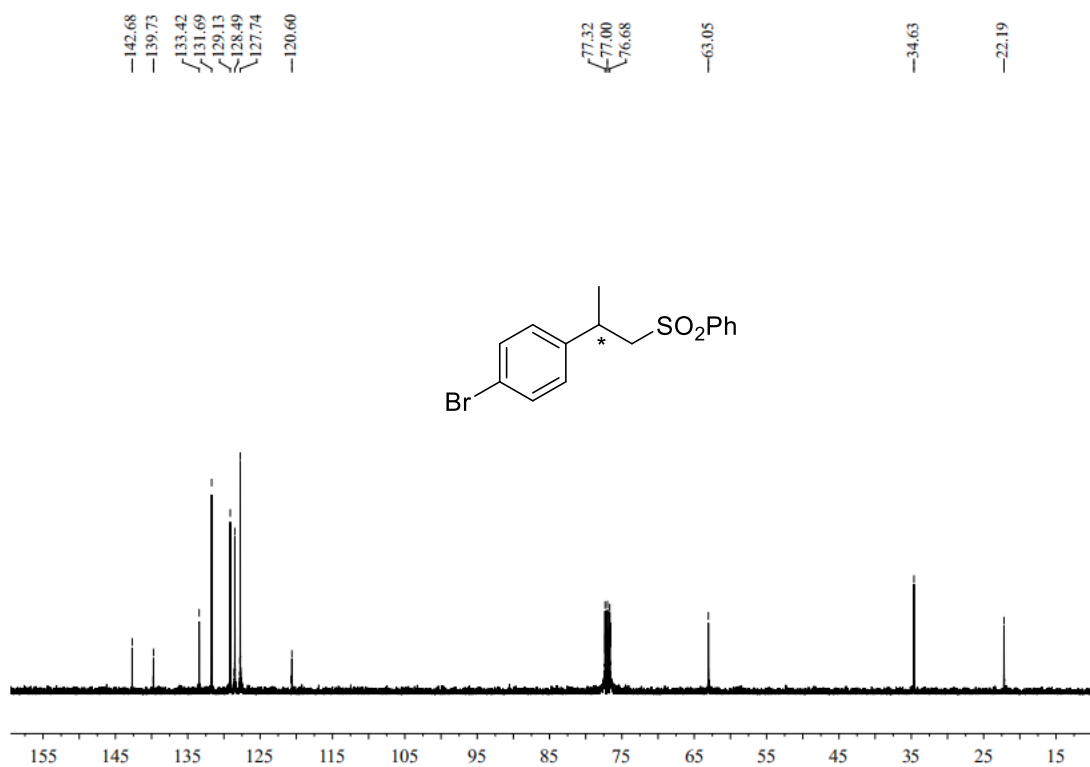

<sup>13</sup>C NMR (100 MHz, Chloroform-*d*)

1-Methoxy-2-(1-(phenylsulfonyl)propan-2-yl)benzene (**2h**)

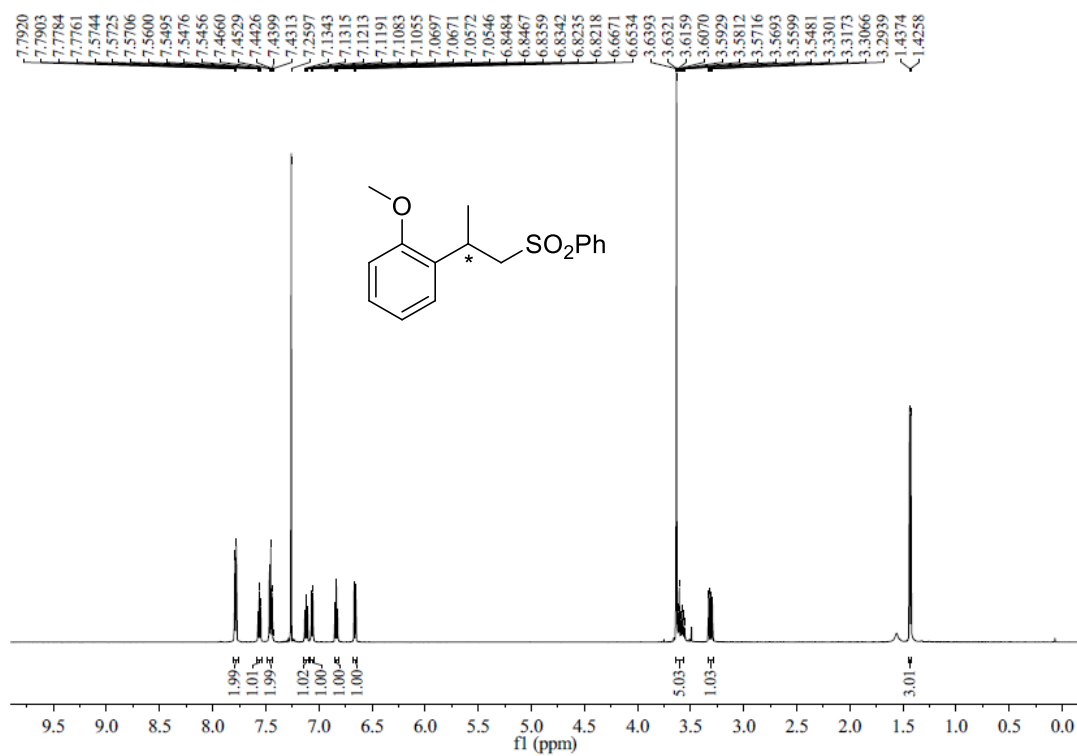

<sup>1</sup>H NMR (600 MHz, Chloroform-*d*)

1-Methoxy-3-(1-(phenylsulfonyl)propan-2-yl)benzene (**2i**)

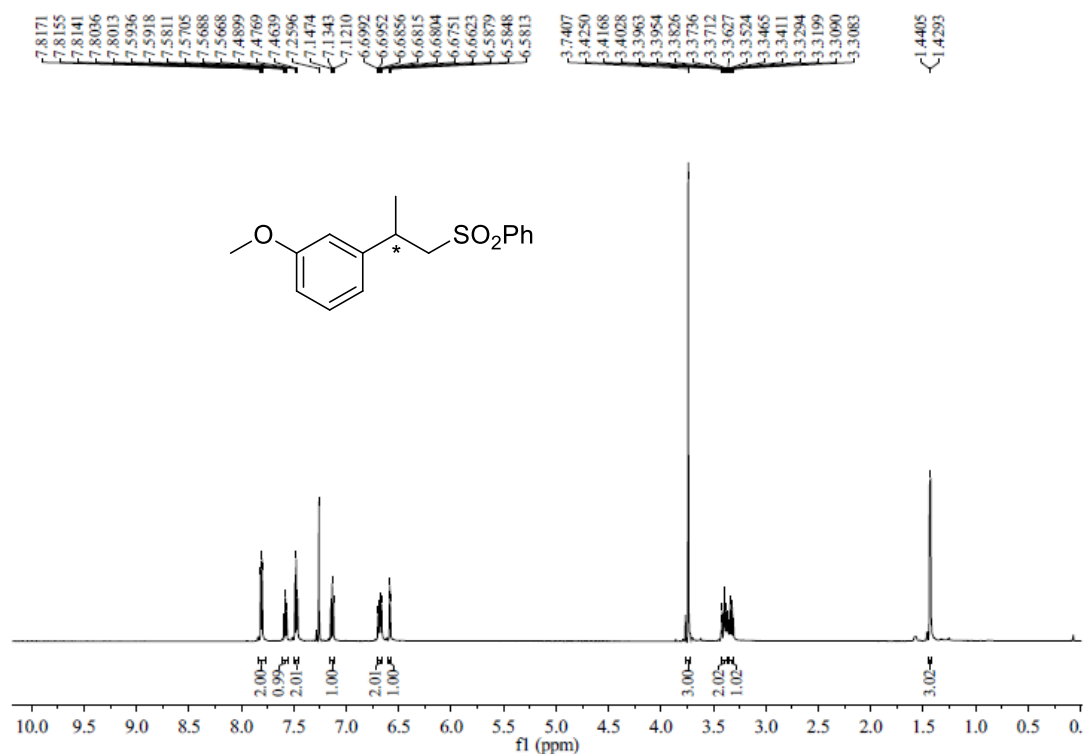

<sup>1</sup>H NMR (600 MHz, Chloroform-*d*)

(*R*)-1-methyl-4-(1-(phenylsulfonyl)propan-2-yl)benzene (**2j**)

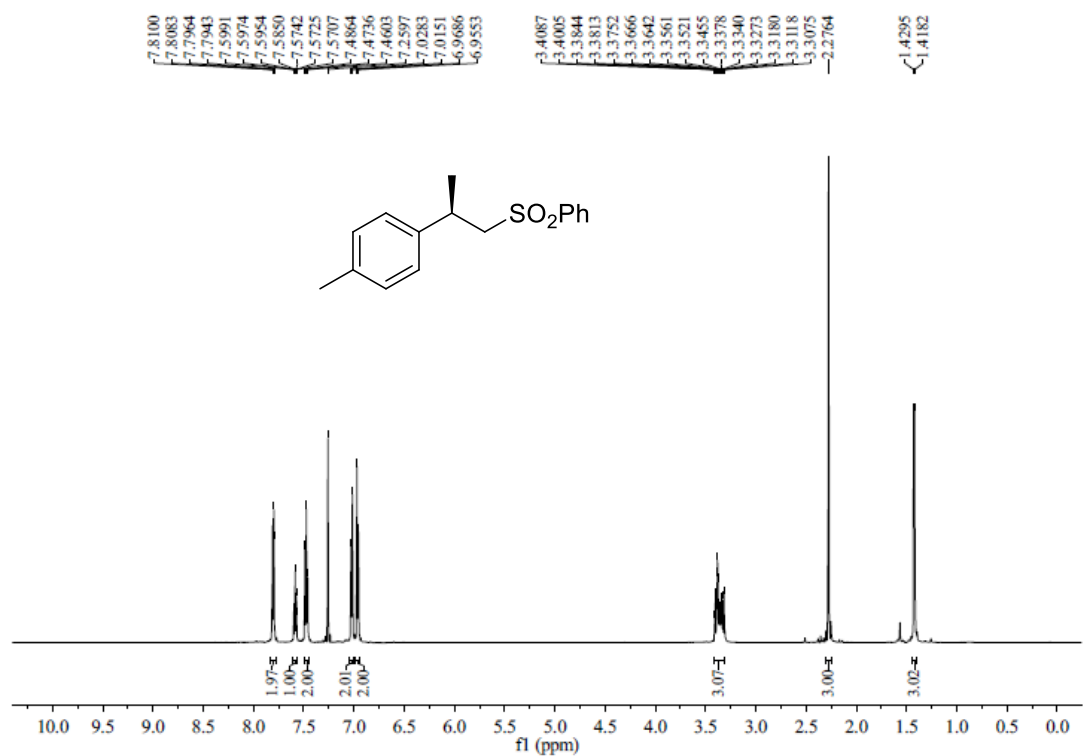

<sup>1</sup>H NMR (600 MHz, Chloroform-*d*)

1-Methyl-2-(1-(phenylsulfonyl)propan-2-yl)benzene (**2k**)

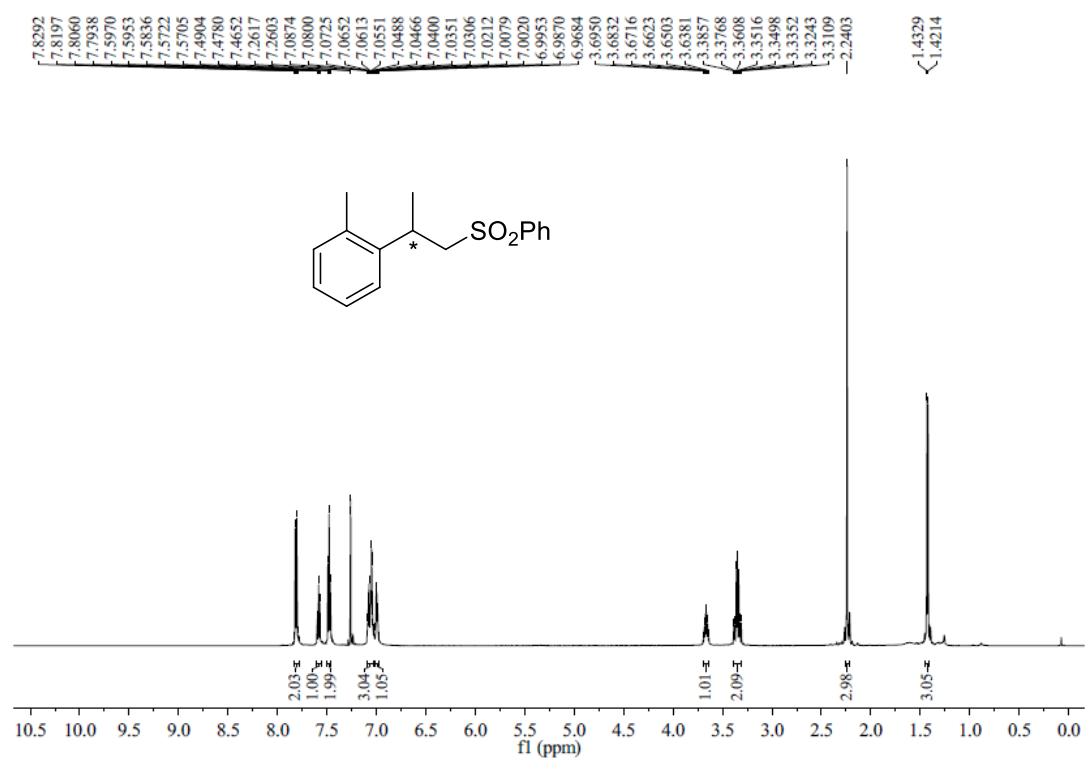

<sup>1</sup>H NMR (600 MHz, Chloroform-*d*)

(*R*)-((2-phenylpropyl)sulfonyl)benzene (**2l**)

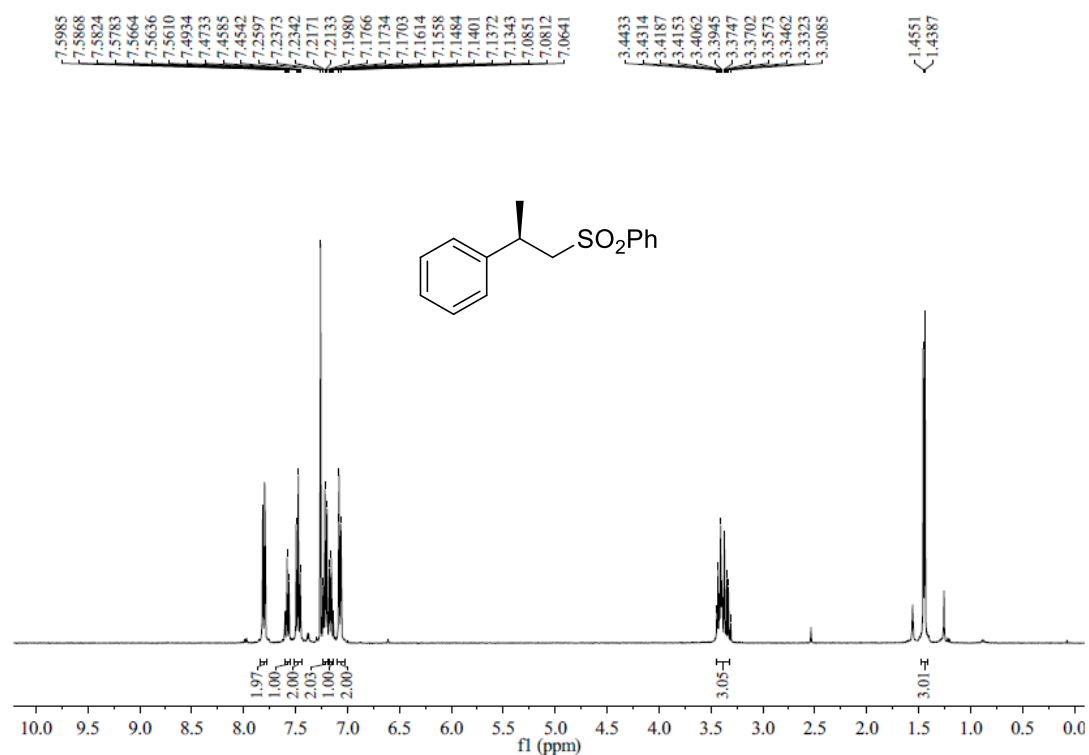

<sup>1</sup>H NMR (400 MHz, Chloroform-*d*)





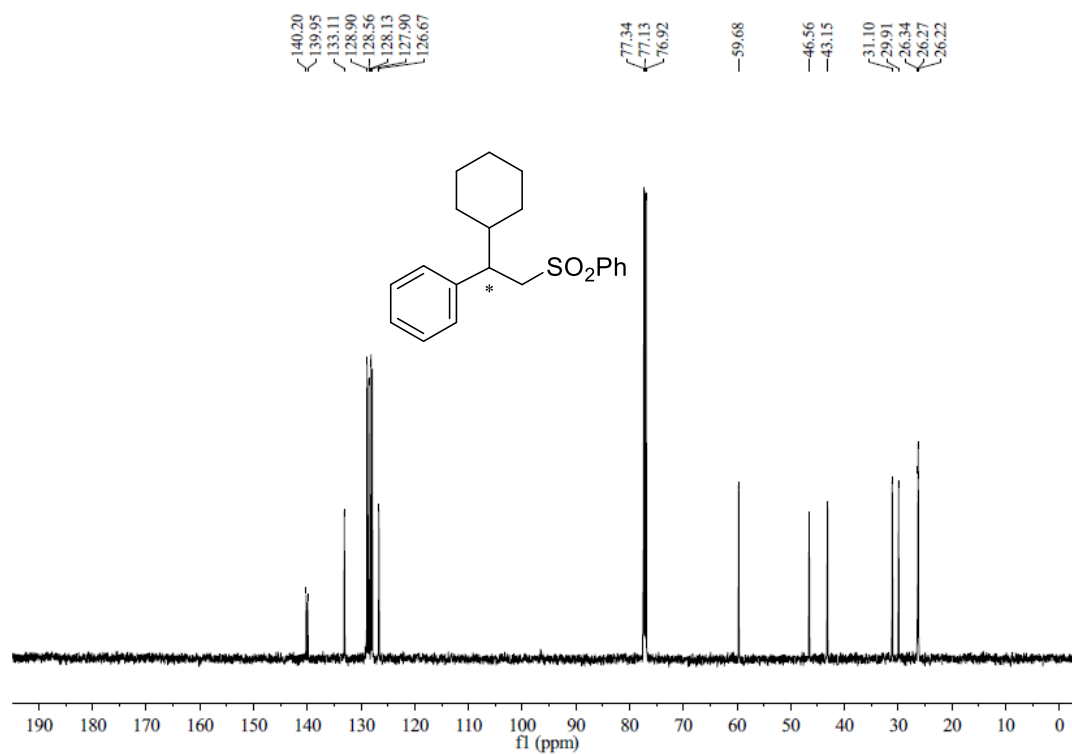

$^{13}\text{C}$  NMR (150 MHz, Chloroform-*d*)

1-(1-(Phenylsulfonyl)propan-2-yl)naphthalene (**2o**)

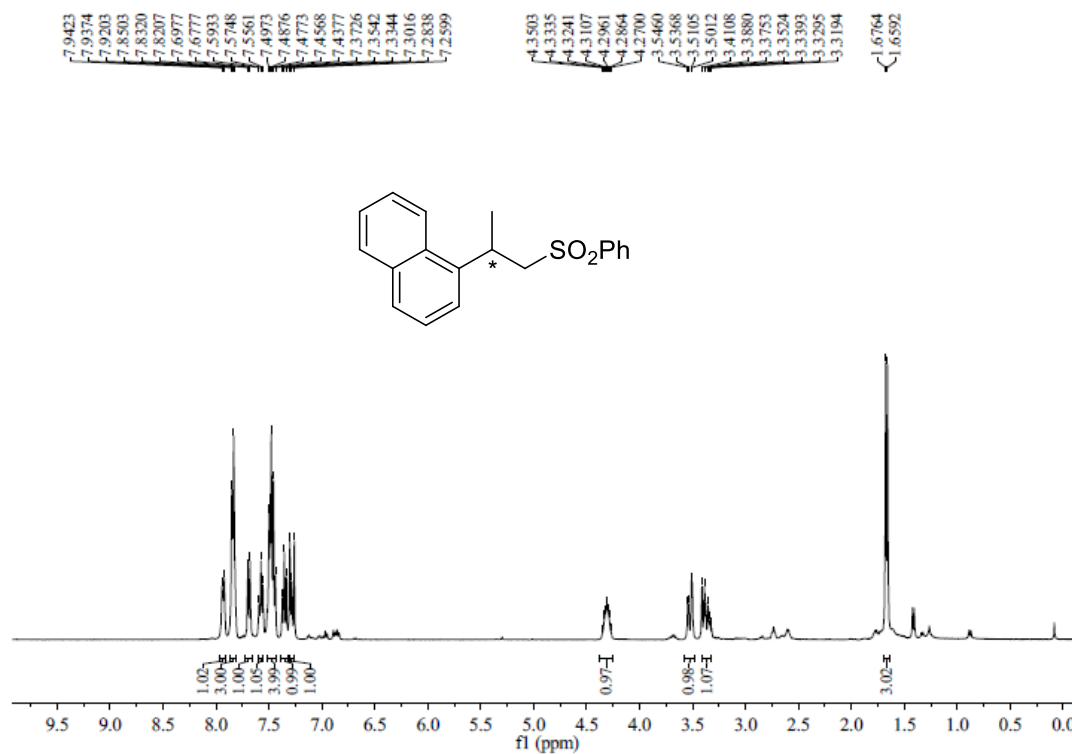

$^1\text{H}$  NMR (400 MHz, Chloroform-*d*)

2-(1-(Phenylsulfonyl)propan-2-yl)naphthalene (**2p**)

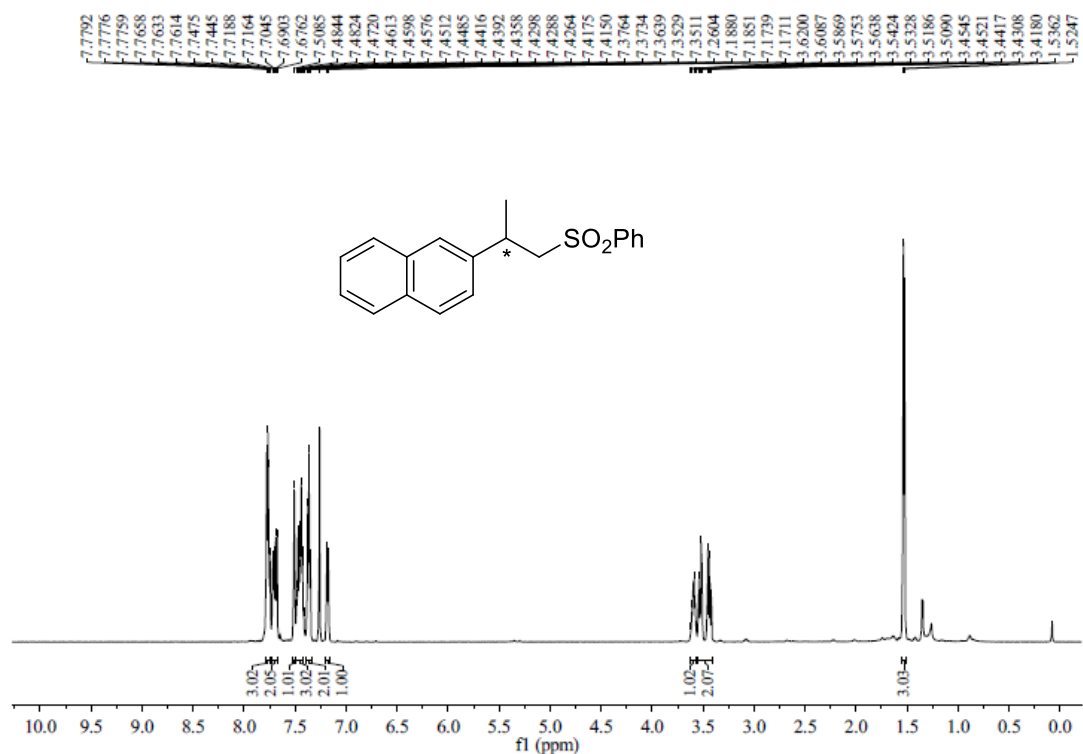

<sup>1</sup>H NMR (600 MHz, Chloroform-*d*)

((2-Phenylbutyl)sulfonyl)benzene (**2q**)

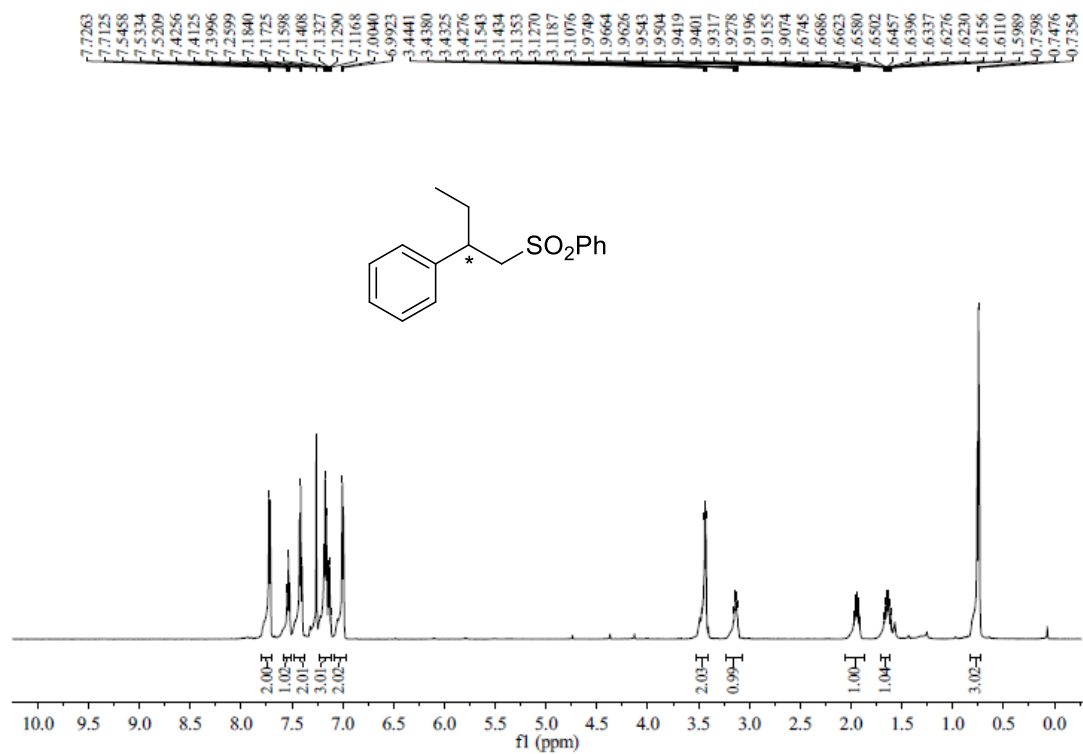

<sup>1</sup>H NMR (600 MHz, Chloroform-*d*)

1-Fluoro-4-((2-phenylpropyl)sulfonyl)benzene (**2r**)

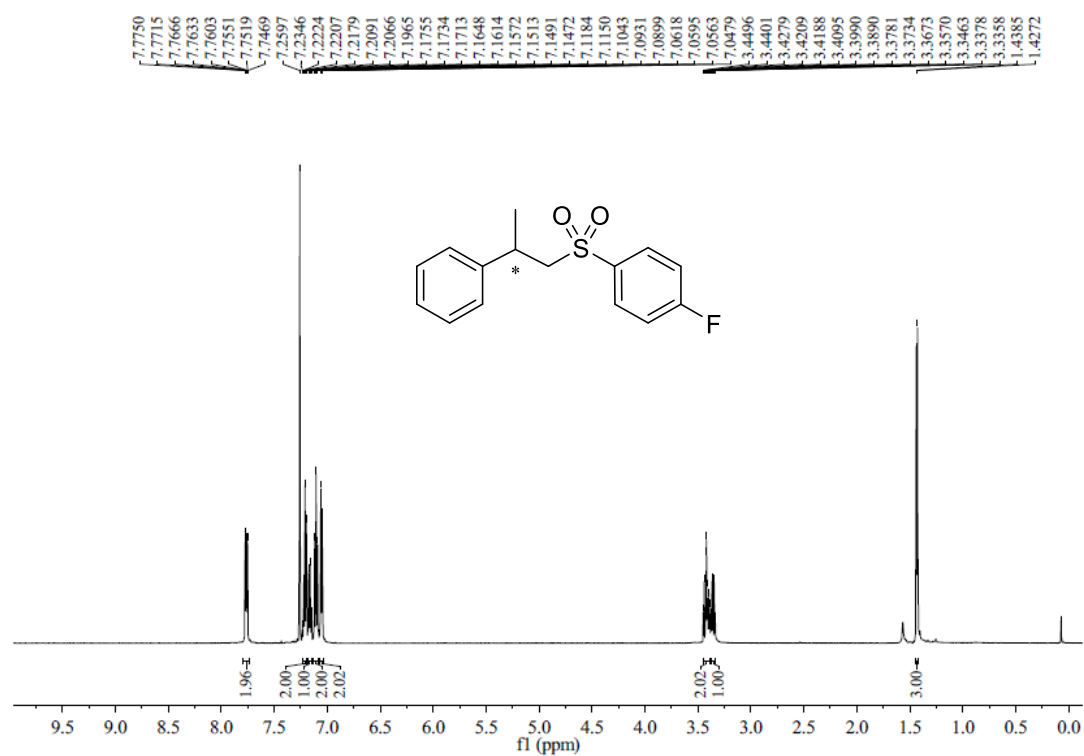

<sup>1</sup>H NMR (600 MHz, Chloroform-*d*)

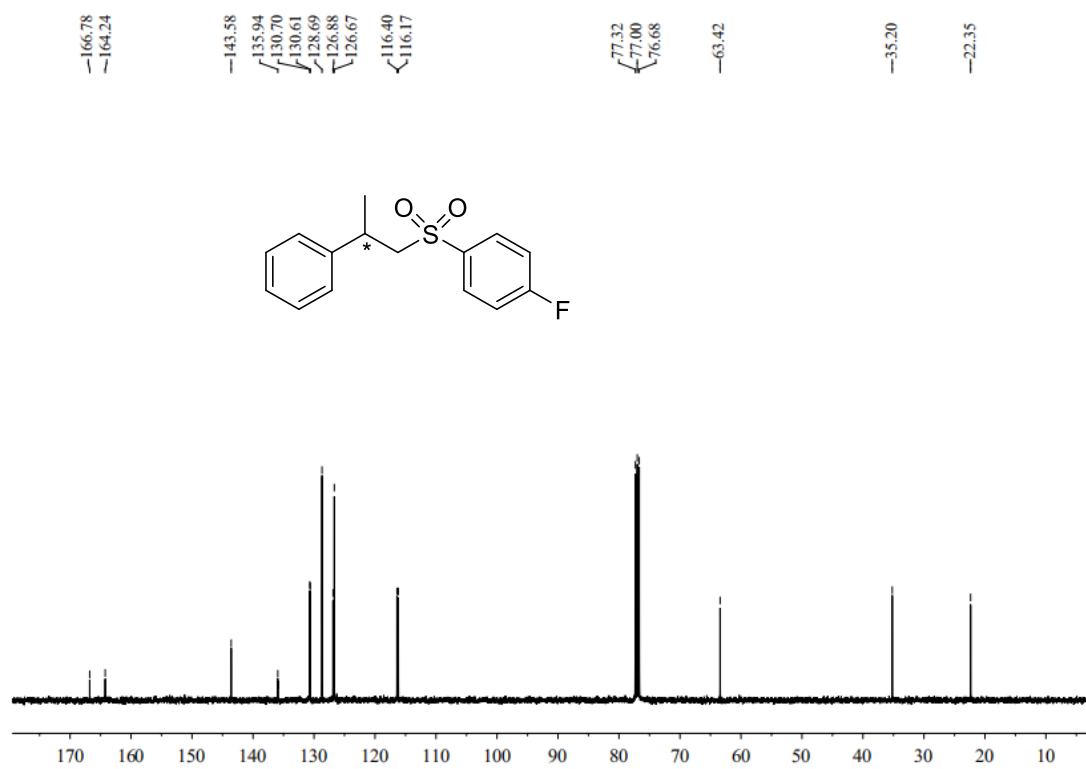

<sup>13</sup>C NMR (100 MHz, Chloroform-*d*)

1-Chloro-4-((2-phenylpropyl)sulfonyl)benzene (**2s**)

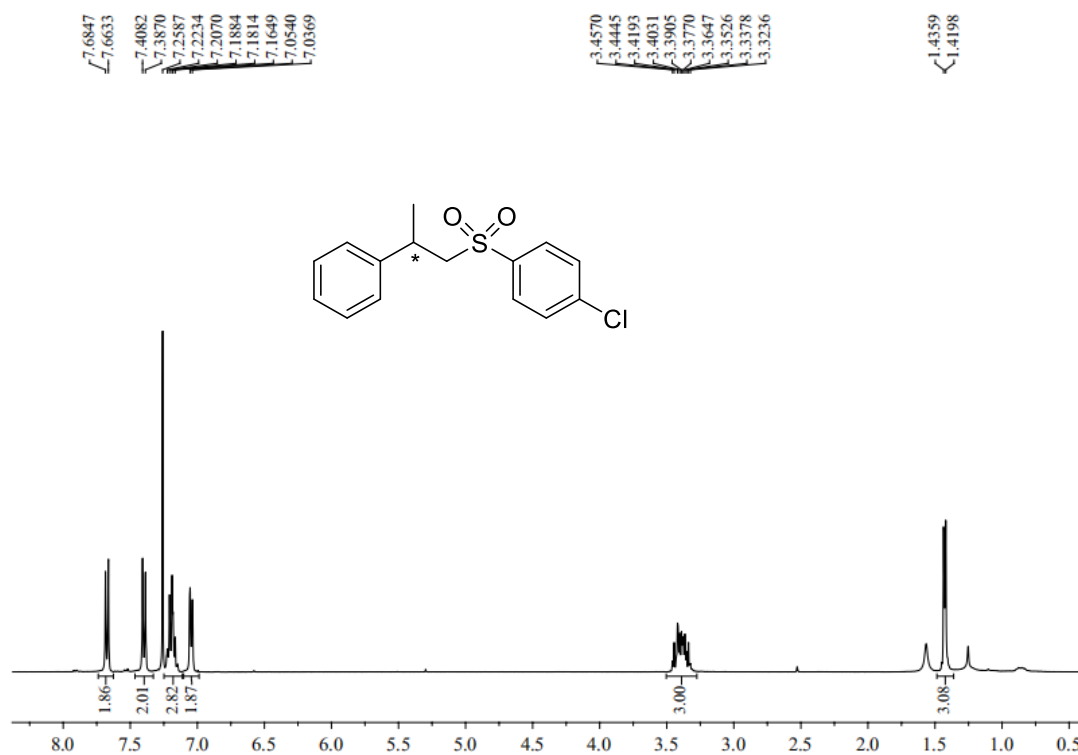

<sup>1</sup>H NMR (400 MHz, Chloroform-*d*)

1-Fluoro-3-(1-phenyl-2-(phenylsulfonyl)ethyl)benzene (**4a**)

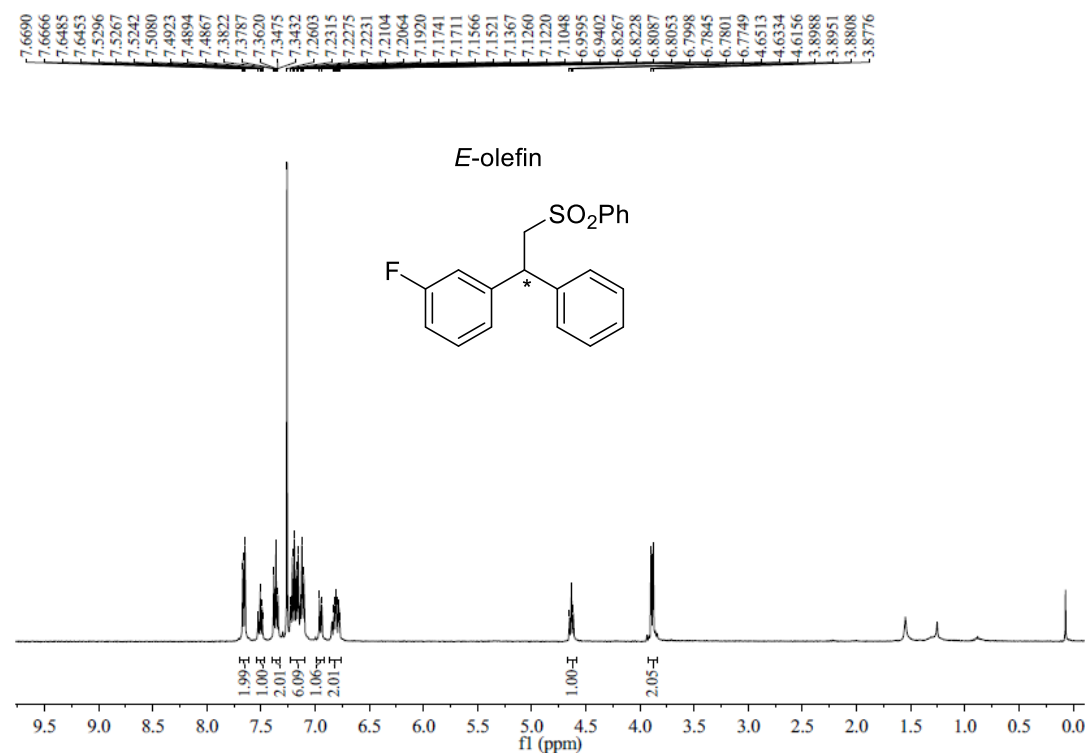

<sup>1</sup>H NMR (400 MHz, Chloroform-*d*)

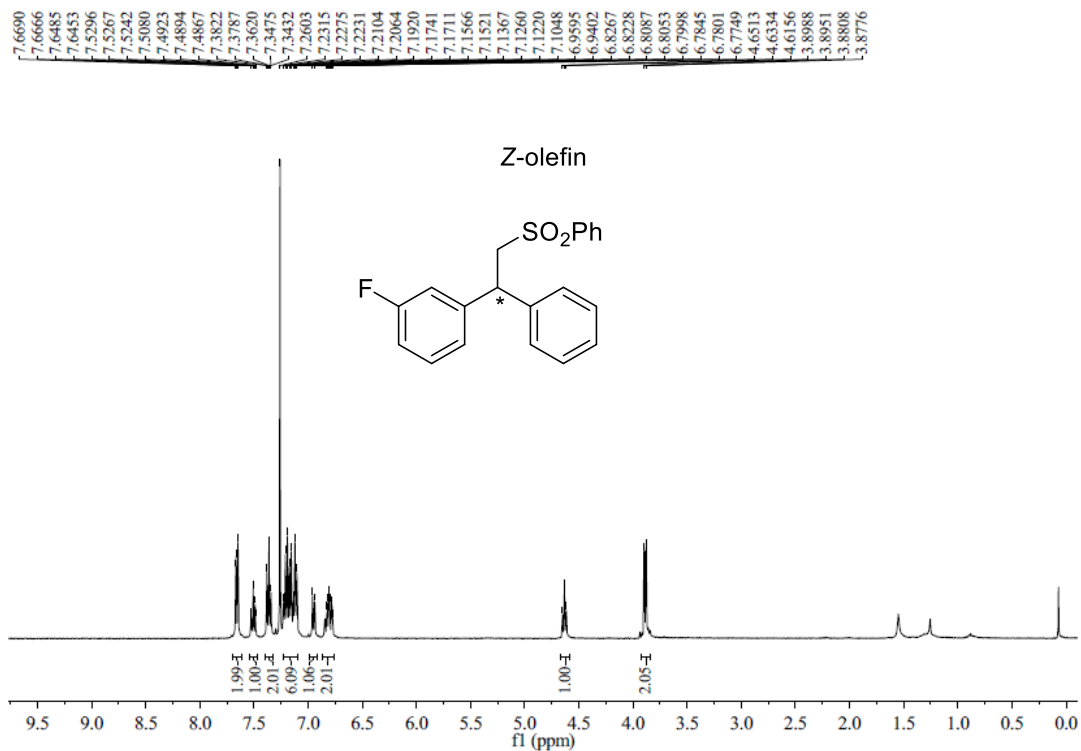

<sup>1</sup>H NMR (400 MHz, Chloroform-*d*)

1-Fluoro-4-(1-phenyl-2-(phenylsulfonyl)ethyl)benzene (**4b**)

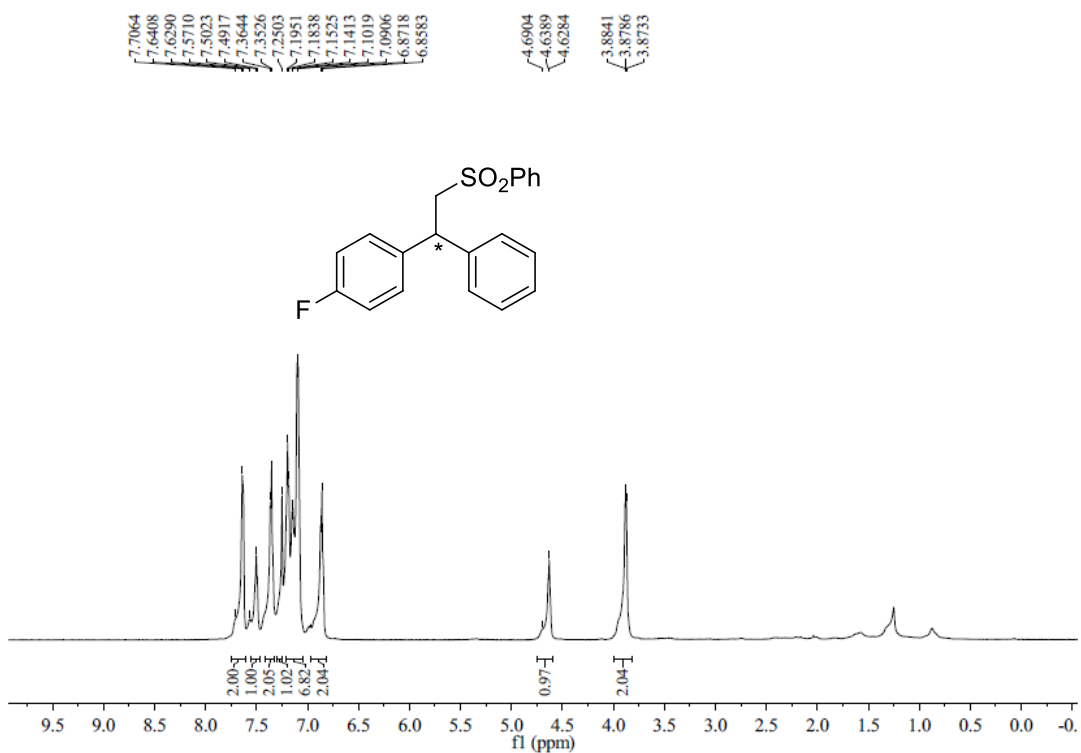

<sup>1</sup>H NMR (600 MHz, Chloroform-*d*)

1-Chloro-4-(1-phenyl-2-(phenylsulfonyl)ethyl)benzene (**4c**)

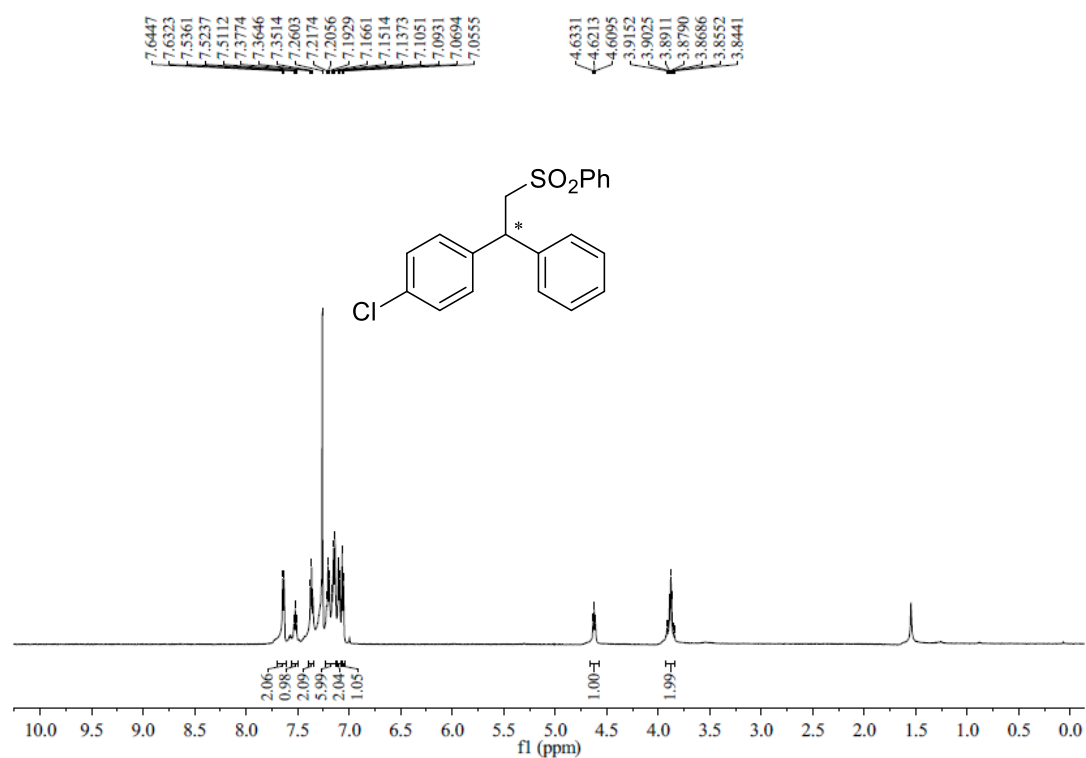

<sup>1</sup>H NMR (600 MHz, Chloroform-*d*)

1-Methyl-2-(1-phenyl-2-(phenylsulfonyl)ethyl)benzene (**4d**)

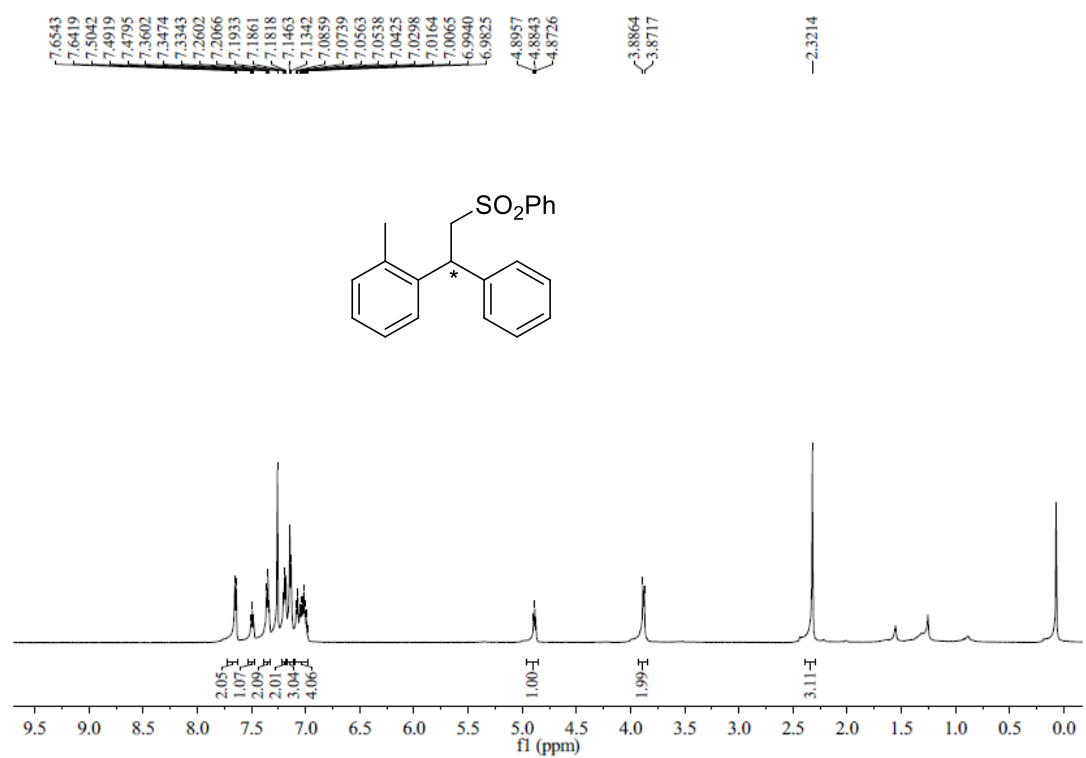

<sup>1</sup>H NMR (600 MHz, Chloroform-*d*)

1-Methyl-3-(1-phenyl-2-(phenylsulfonyl)ethyl)benzene (**4e**)

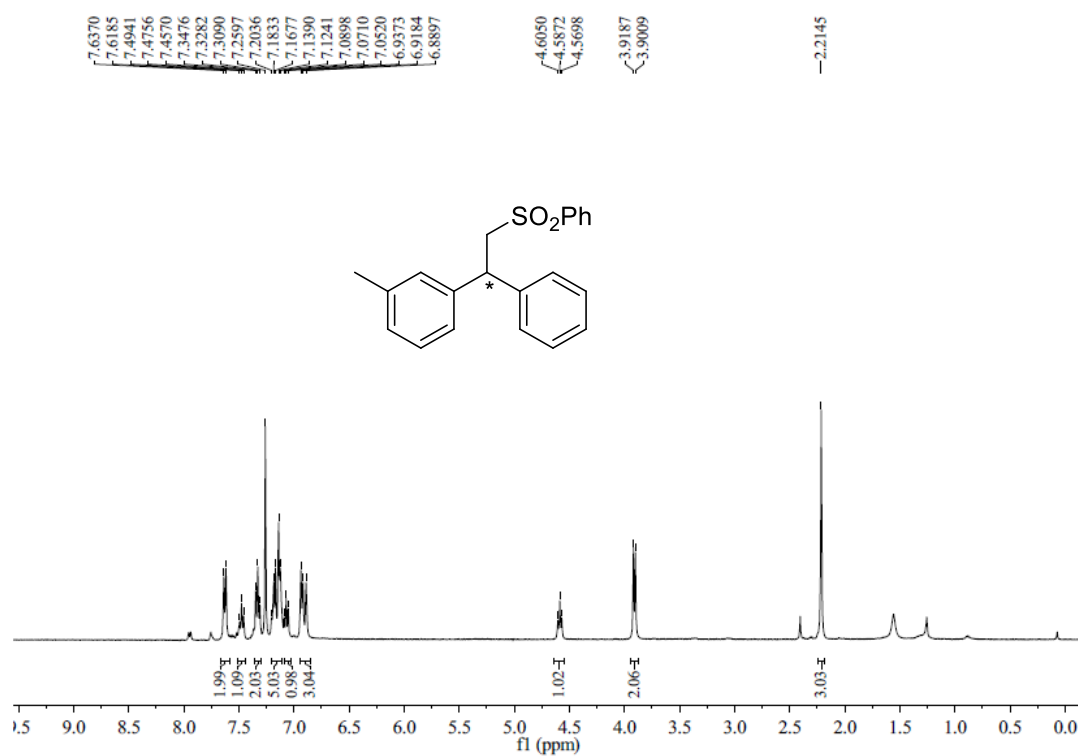

<sup>1</sup>H NMR (400 MHz, Chloroform-*d*)

1-Methyl-4-(1-phenyl-2-(phenylsulfonyl)ethyl)benzene (**4f**)

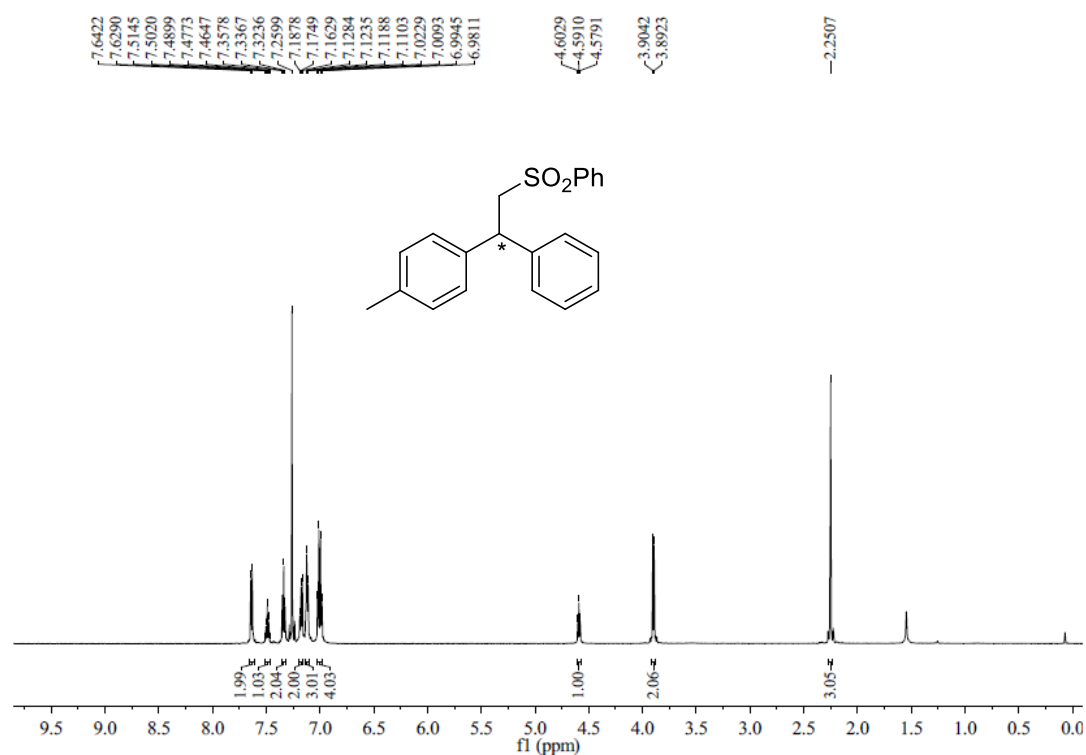

<sup>1</sup>H NMR (600 MHz, Chloroform-*d*)



1,2-Dichloro-4-(1-phenyl-2-(phenylsulfonyl)ethyl)benzene (**4g**)

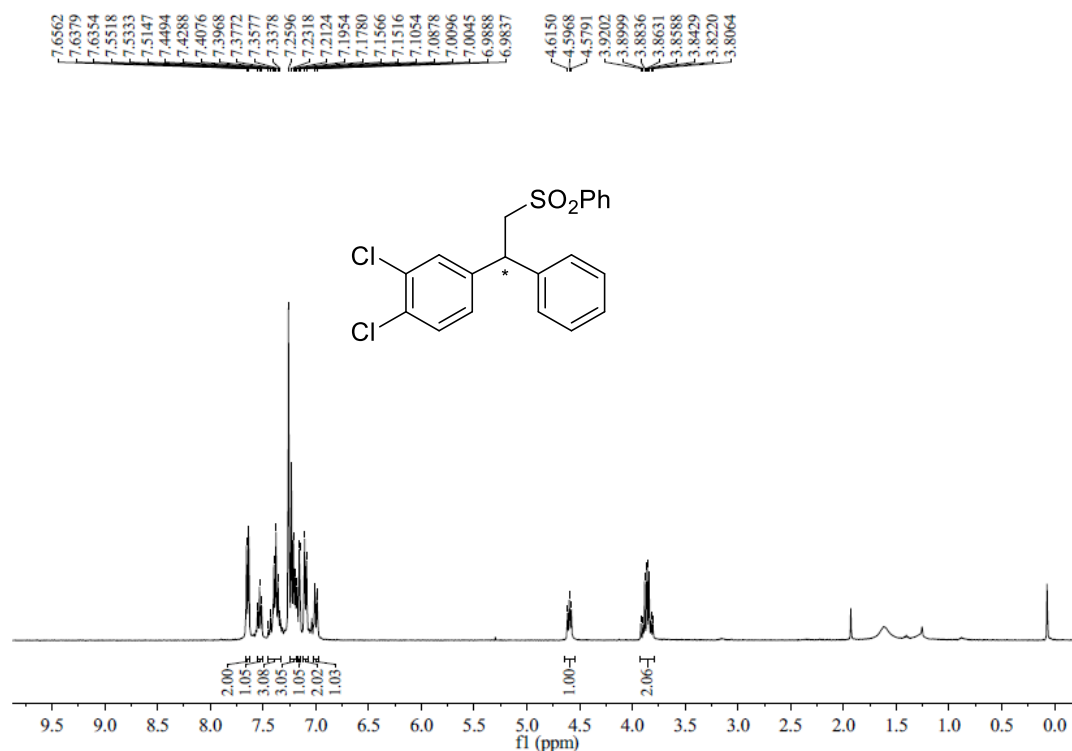

<sup>1</sup>H NMR (400 MHz, Chloroform-*d*)

1,3-Dimethyl-5-(1-phenyl-2-(phenylsulfonyl)ethyl)benzene (**4h**)

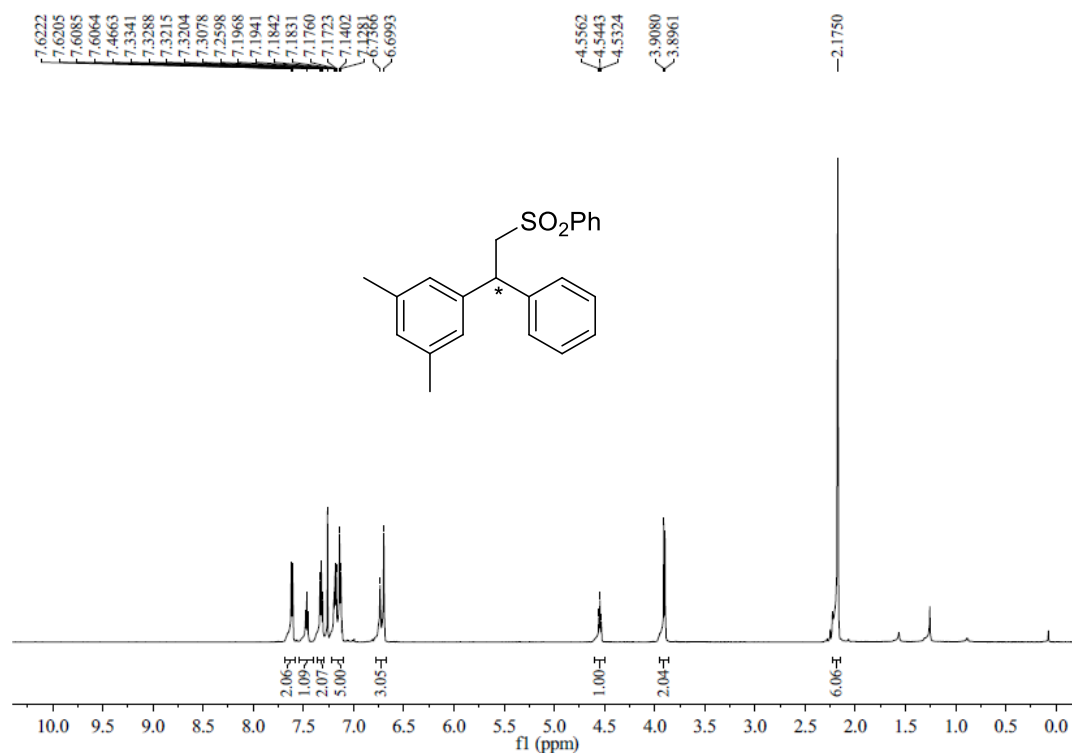

<sup>1</sup>H NMR (600 MHz, Chloroform-*d*)

1-Chloro-4-(2-(phenylsulfonyl)-1-(*p*-tolyl)ethyl)benzene (**4i**)

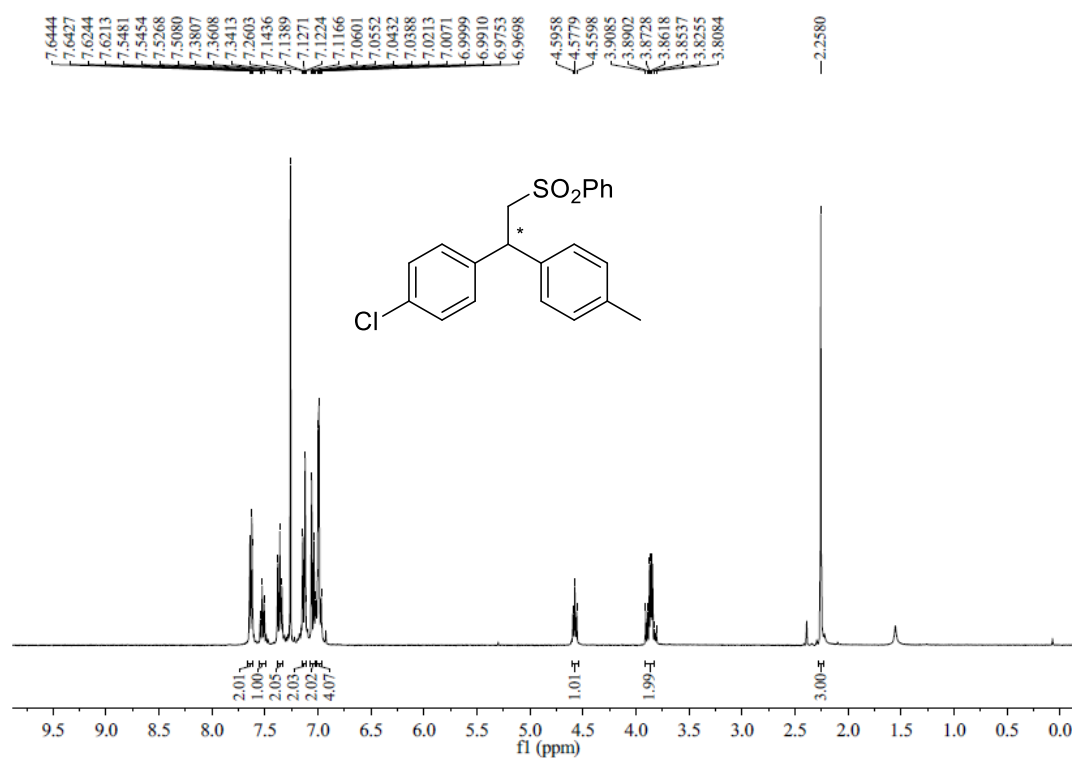

<sup>1</sup>H NMR (400 MHz, Chloroform-*d*)

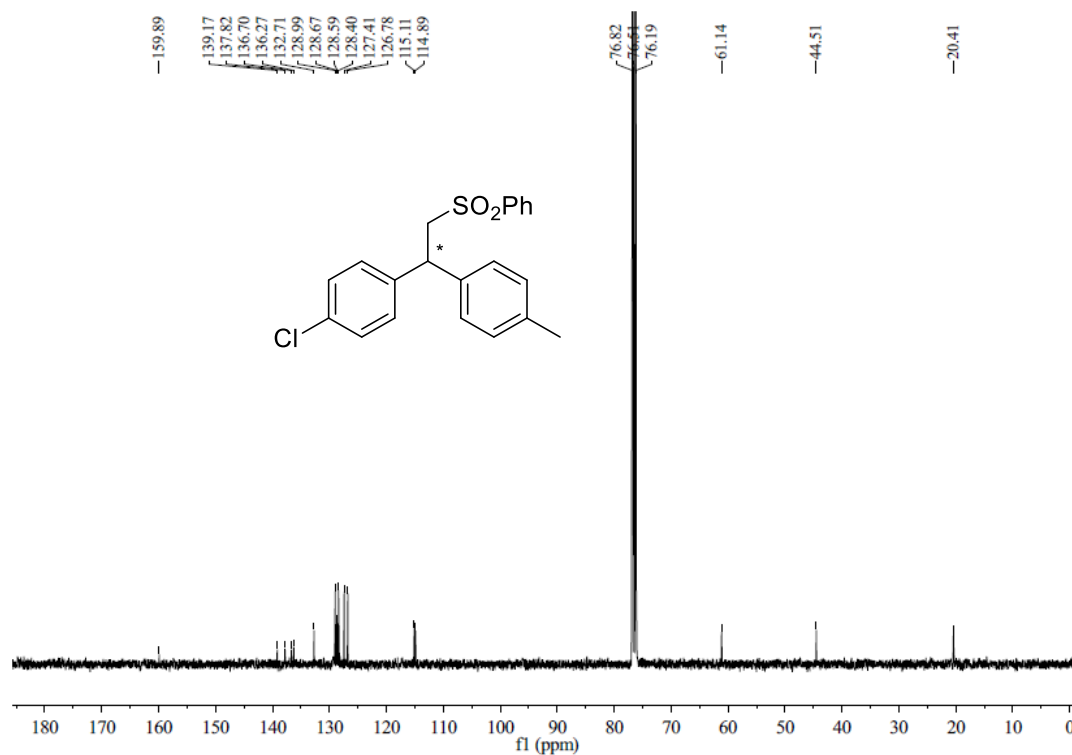

<sup>13</sup>C NMR (100 MHz, Chloroform-*d*)

1-Fluoro-4-(2-(phenylsulfonyl)-1-(*p*-tolyl)ethyl)benzene (**4j**)

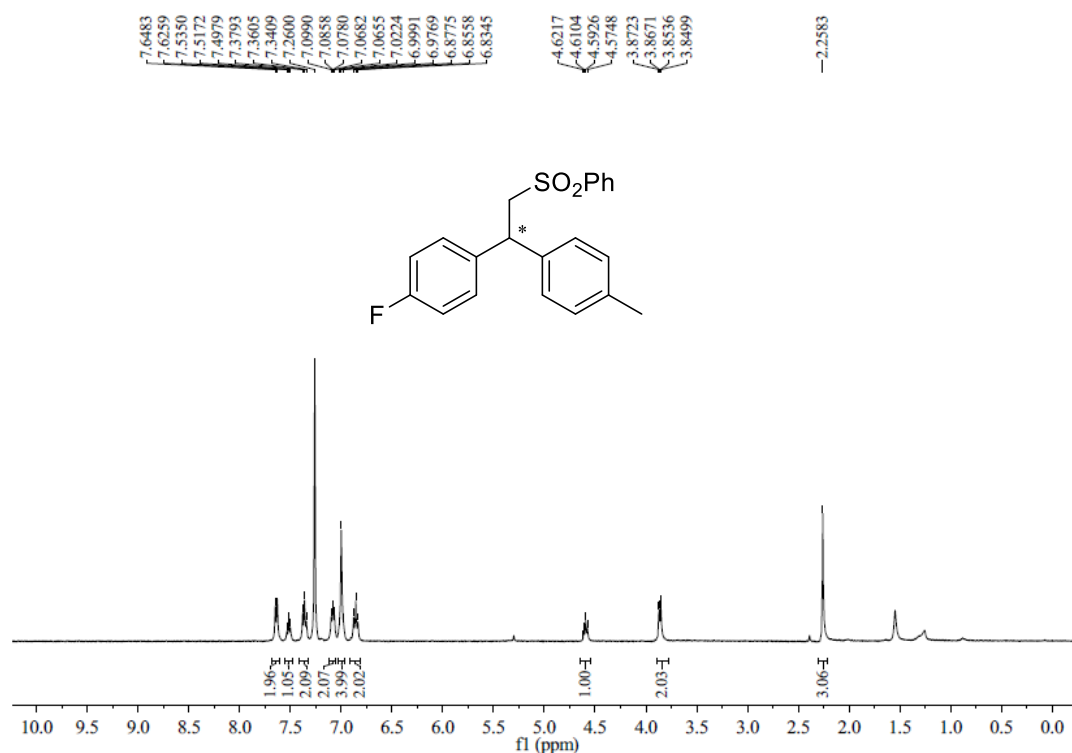

<sup>1</sup>H NMR (400 MHz, Chloroform-*d*)

1-Methyl-3-(2-(phenylsulfonyl)-1-(*p*-tolyl)ethyl)benzene (**4k**)

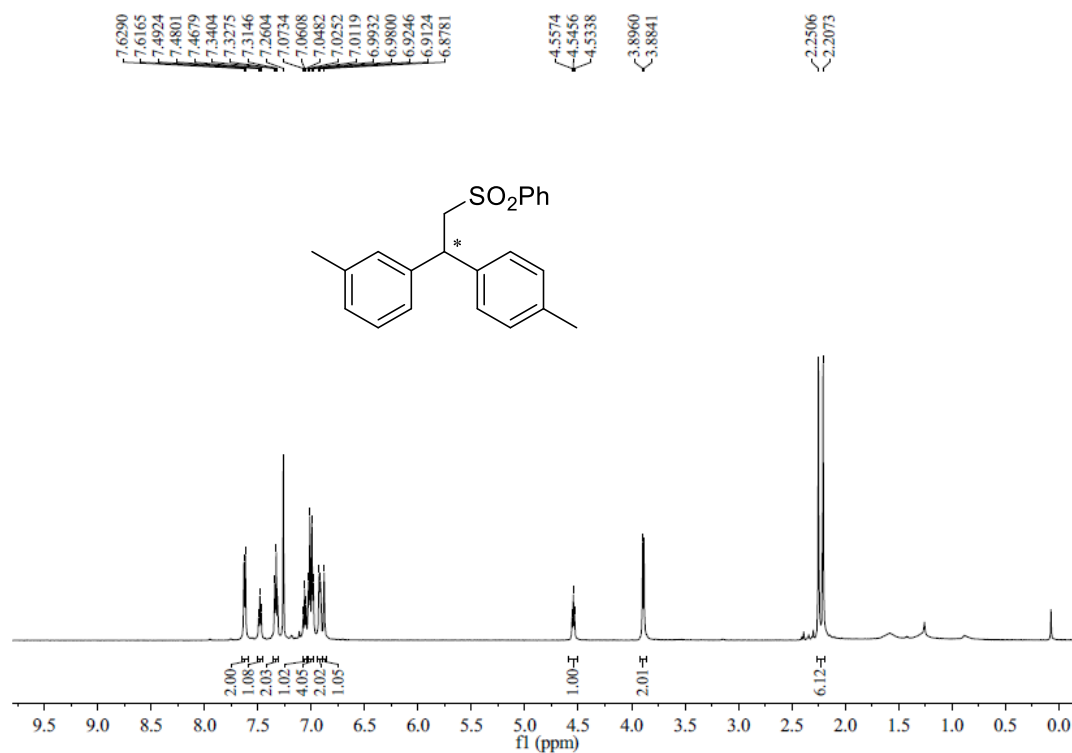

<sup>1</sup>H NMR (600 MHz, Chloroform-*d*)

1-Fluoro-3-(2-(phenylsulfonyl)-1-(*m*-tolyl)ethyl)benzene (**4l**)

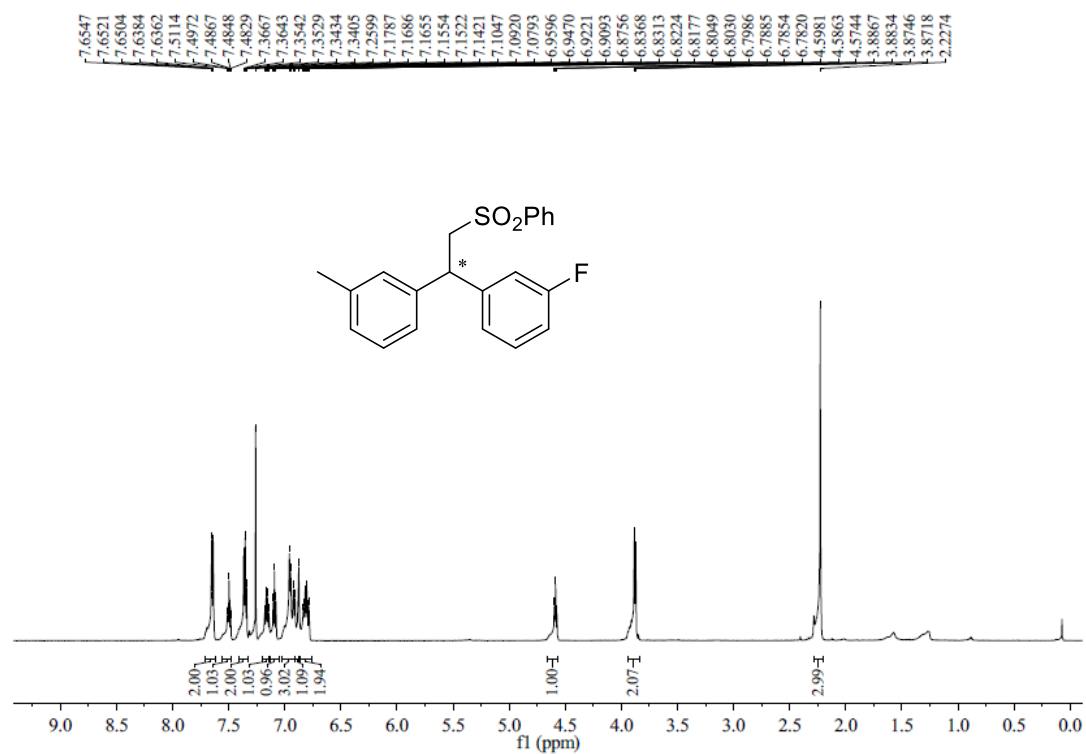

3-(1-Phenyl-2-(phenylsulfonyl)ethyl)pyridine (**4m**)

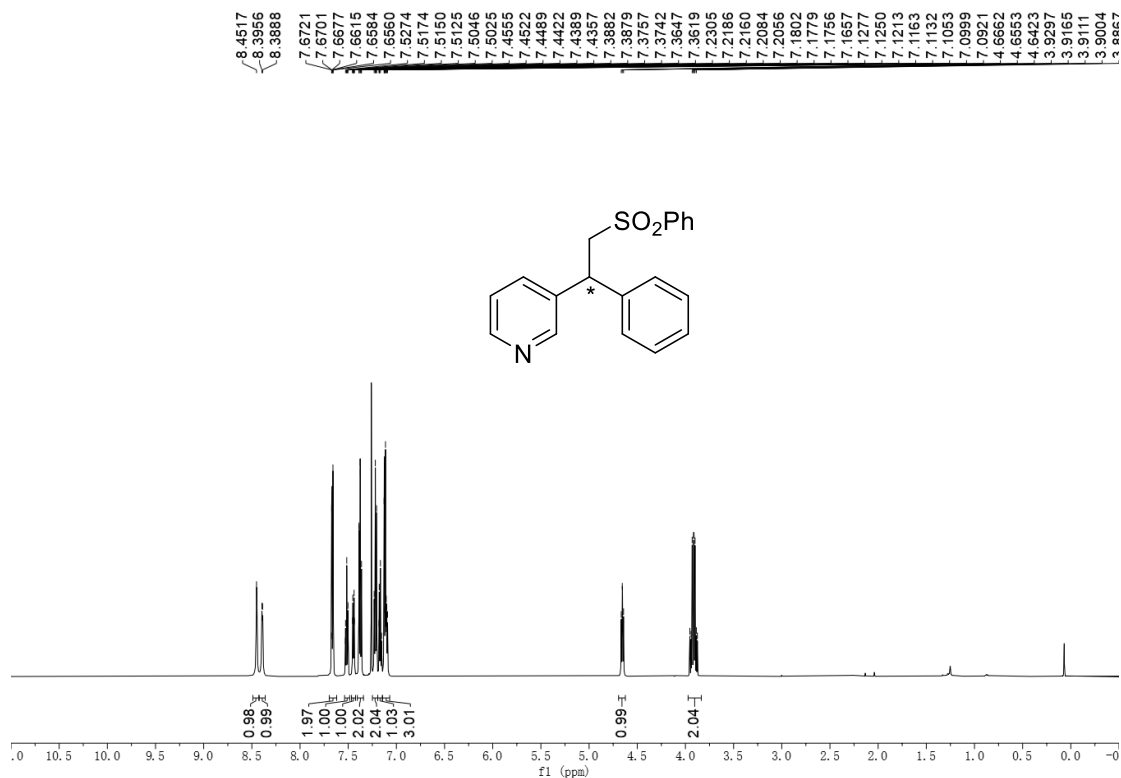

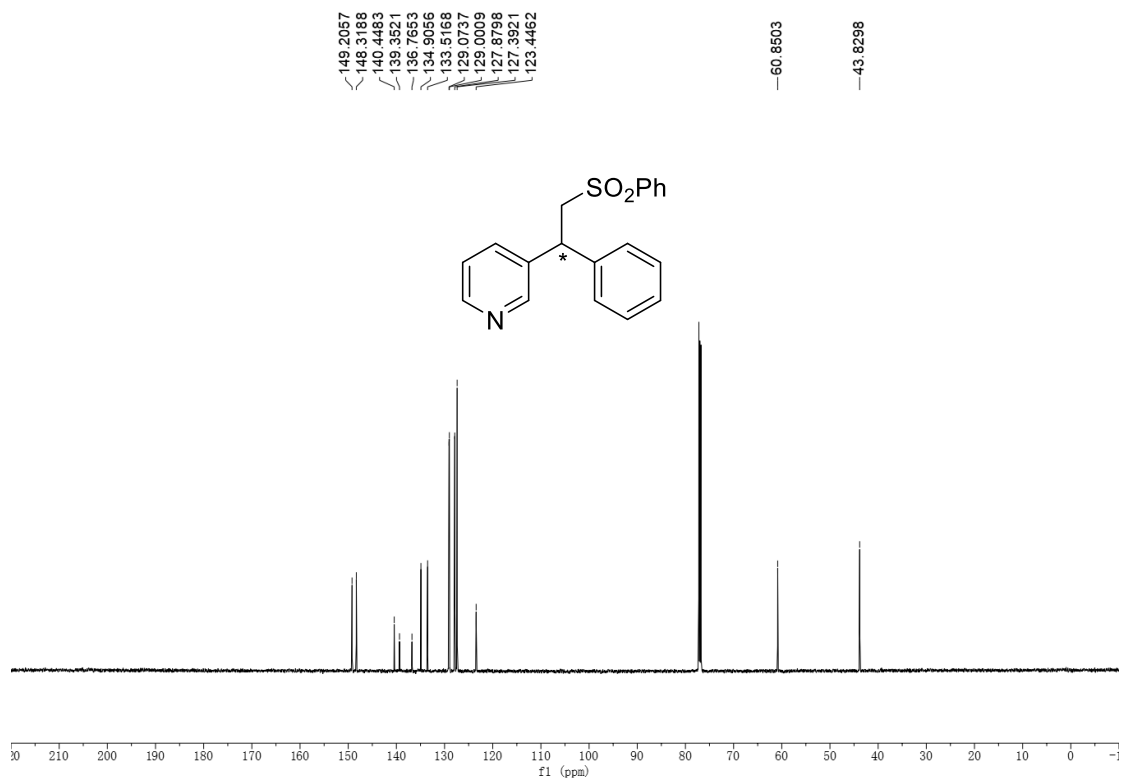

<sup>13</sup>C NMR (151 MHz, Chloroform-*d*)

1-Methyl-4-(2-(methylsulfonyl)-1-phenylethyl)benzene (**4n**)

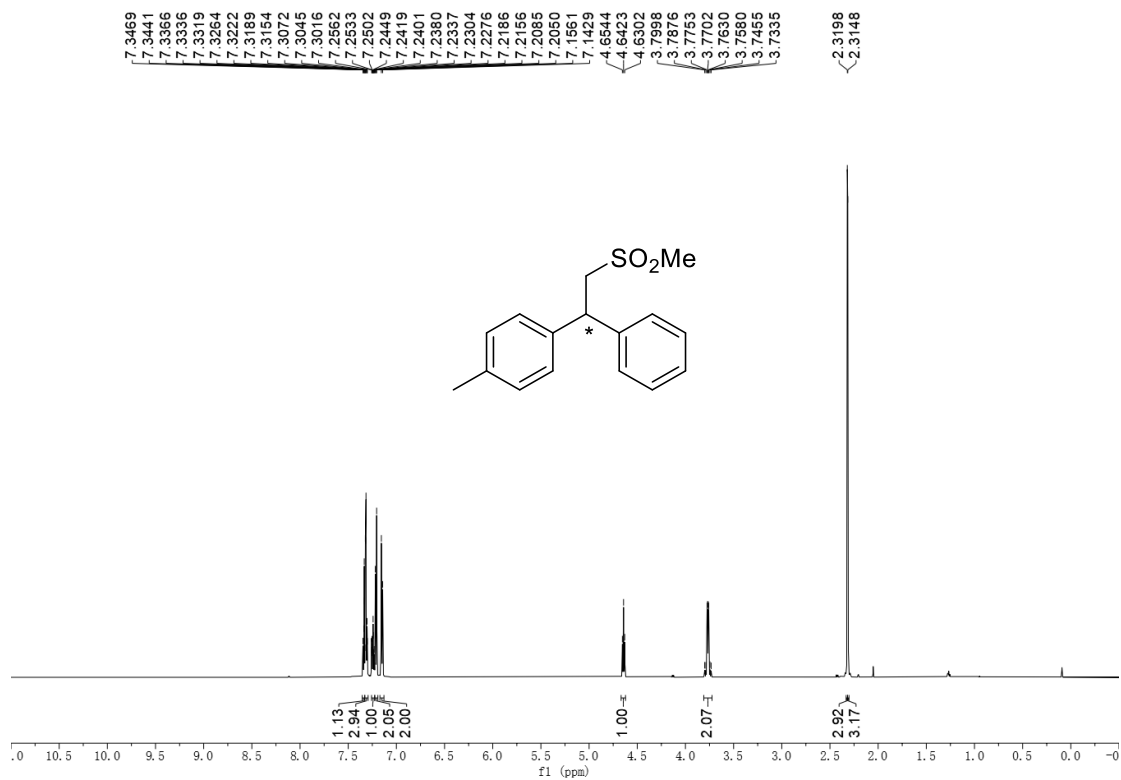

<sup>1</sup>H NMR (600 MHz, Chloroform-*d*)

141.9220  
138.5983  
137.2338  
129.8946  
129.1946  
127.7336  
127.6729  
127.4228

61.0487

46.0062  
42.1130

21.0905

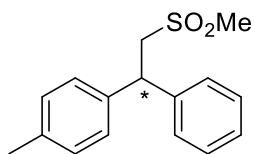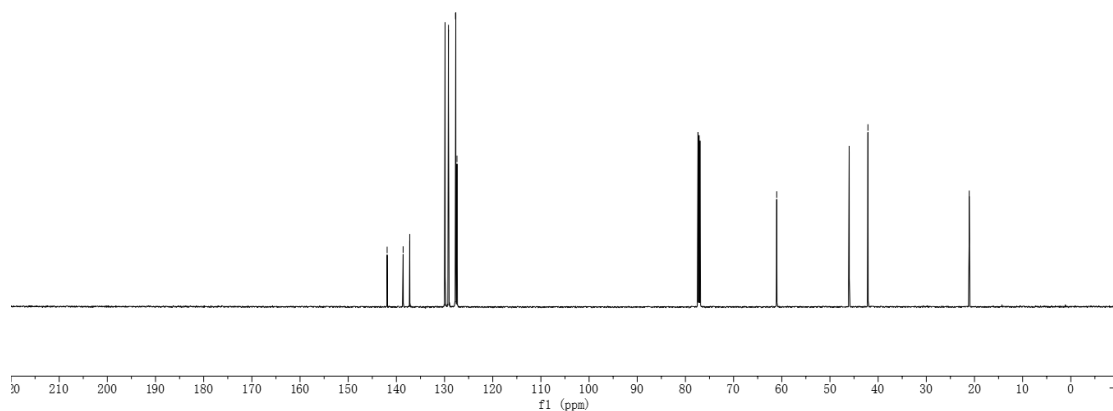

<sup>13</sup>C NMR (151 MHz, Chloroform-*d*)

# 1-Fluoro-3-(1-(phenylsulfonyl)propan-2-yl)benzene (2a)

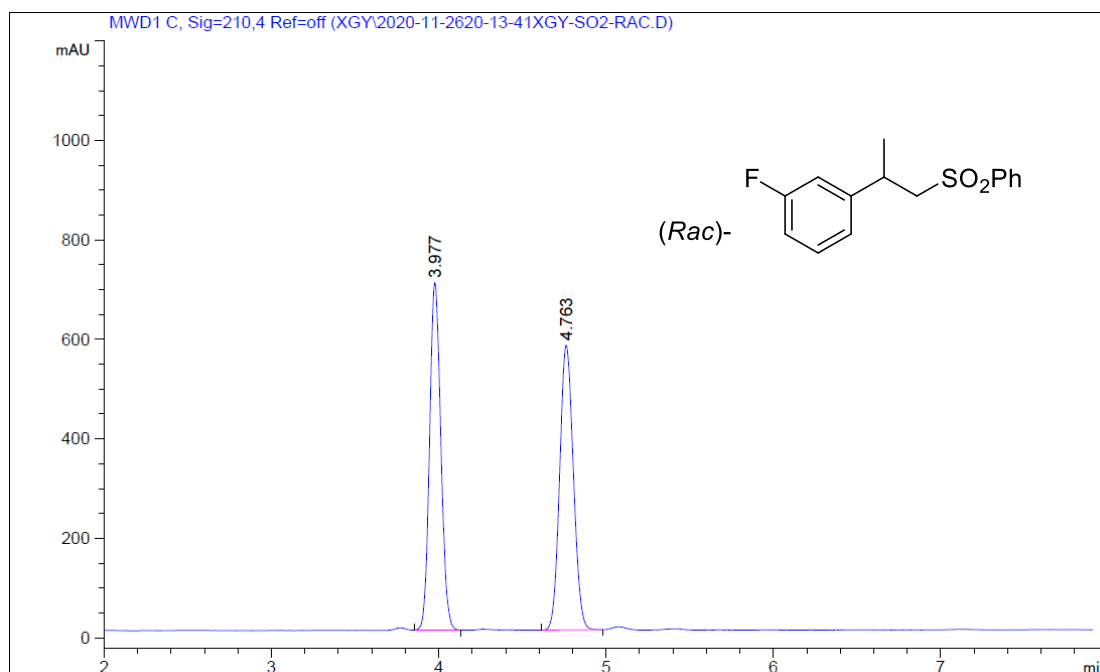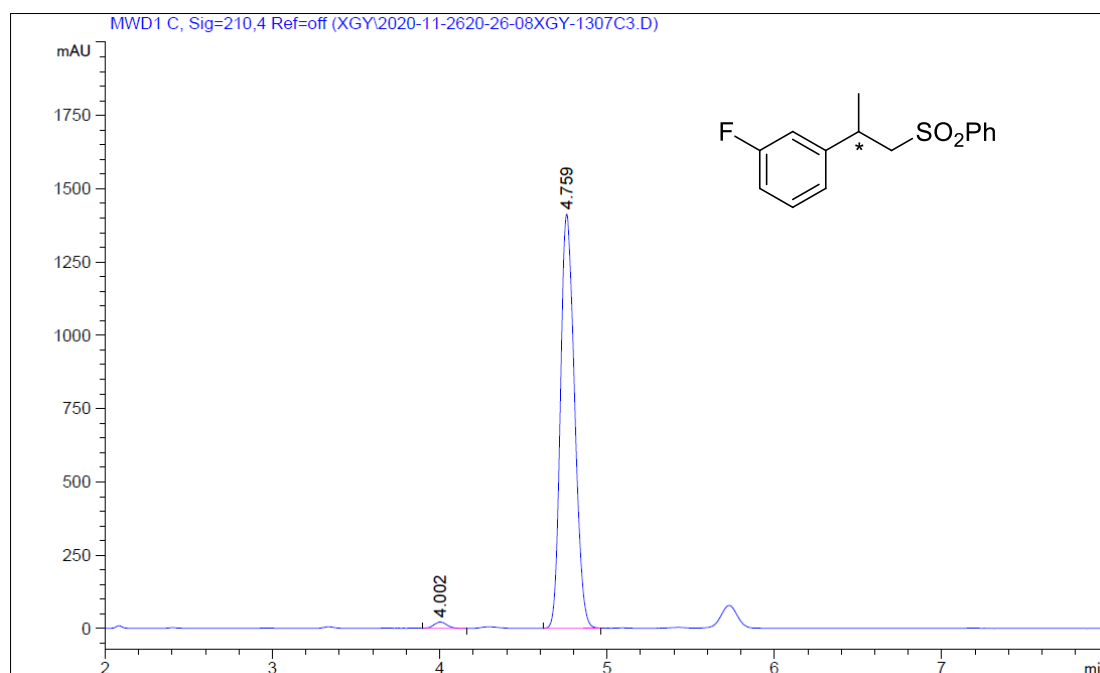

Signal 1: MWD1 C, Sig=210,4 Ref=off

| Peak # | RetTime [min] | Type | Width [min] | Area [mAU*s] | Height [mAU] | Area %  |
|--------|---------------|------|-------------|--------------|--------------|---------|
| 1      | 4.002         | BB   | 0.0788      | 115.46550    | 21.46290     | 1.3749  |
| 2      | 4.759         | BB   | 0.0919      | 8282.41113   | 1412.36768   | 98.6251 |

# 1-Fluoro-2-(1-(phenylsulfonyl)propan-2-yl)benzene (**2b**)

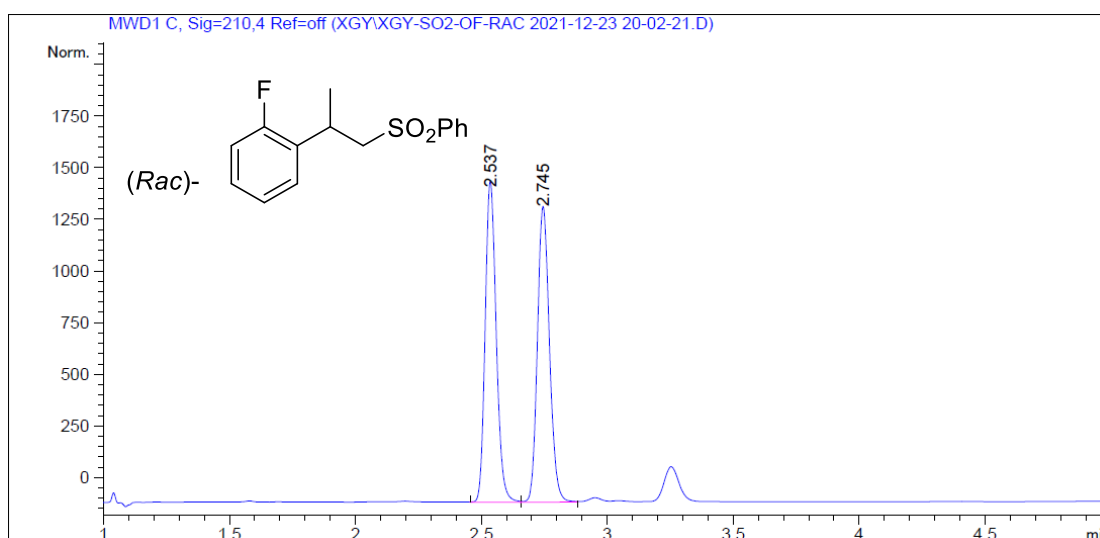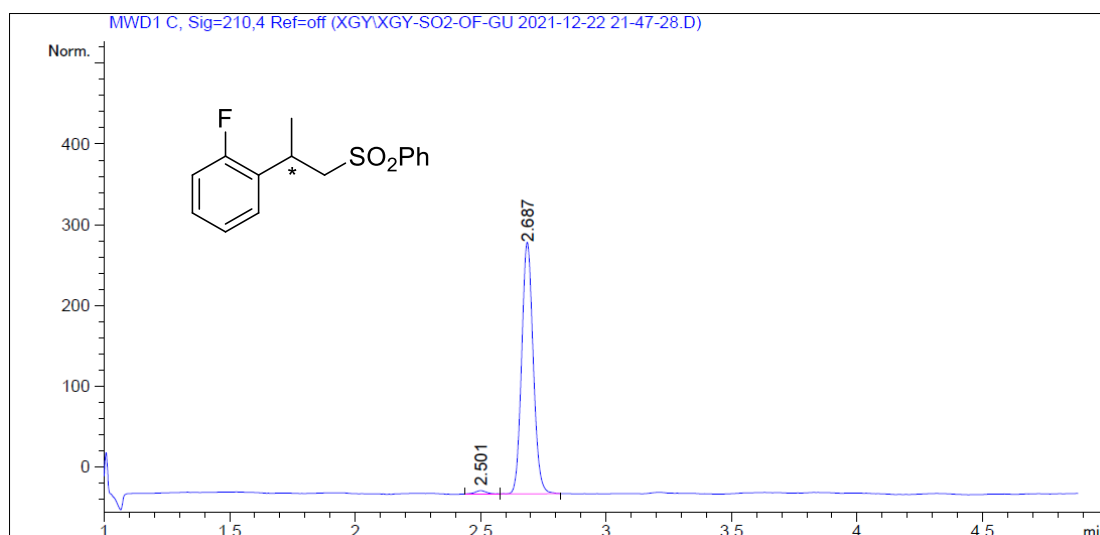

Signal 1: MWD1 C, Sig=210,4 Ref=off

| Peak # | RetTime [min] | Type | Width [min] | Area [mAU*s] | Height [mAU] | Area %  |
|--------|---------------|------|-------------|--------------|--------------|---------|
| 1      | 2.501         | BV   | 0.0472      | 9.30723      | 3.08132      | 1.1836  |
| 2      | 2.687         | VB   | 0.0499      | 777.01752    | 239.02773    | 98.8164 |



# 1-Fluoro-4-(1-(phenylsulfonyl)propan-2-yl)benzene (**2c**)

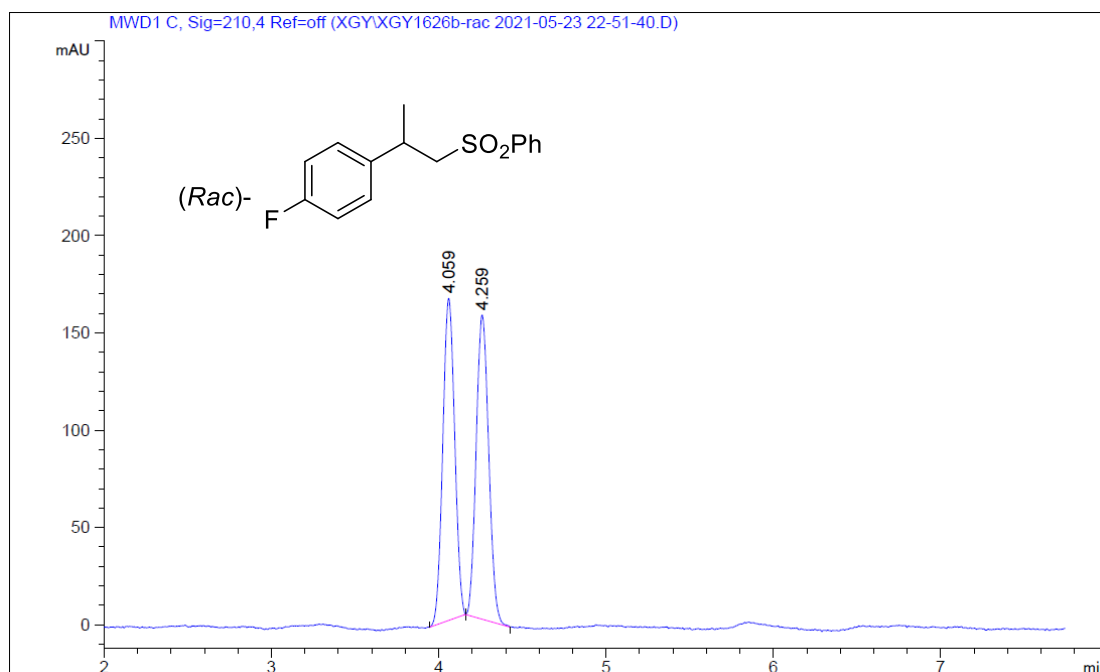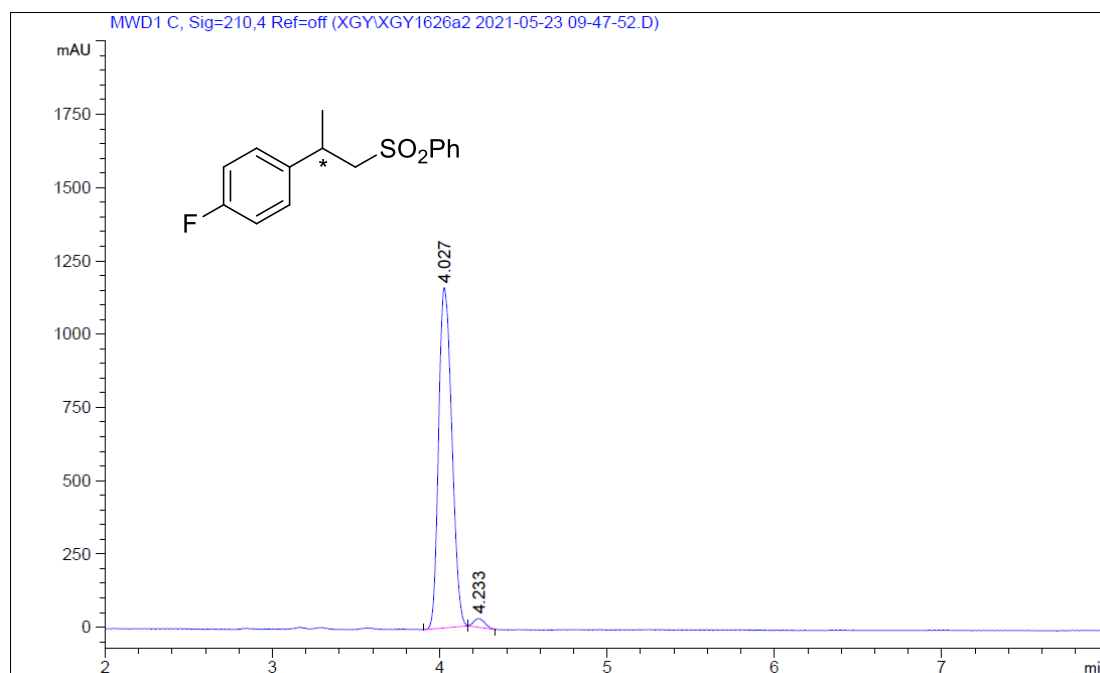

Signal 1: MWD1 C, Sig=210,4 Ref=off

| Peak # | RetTime [min] | Type | Width [min] | Area [mAU*s] | Height [mAU] | Area %  |
|--------|---------------|------|-------------|--------------|--------------|---------|
| 1      | 4.027         | BB   | 0.0840      | 6378.52734   | 1161.85779   | 97.8981 |
| 2      | 4.233         | BB   | 0.0584      | 136.94913    | 30.17833     | 2.1019  |

# 1-Chloro-3-(1-(phenylsulfonyl)propan-2-yl)benzene (**2d**)

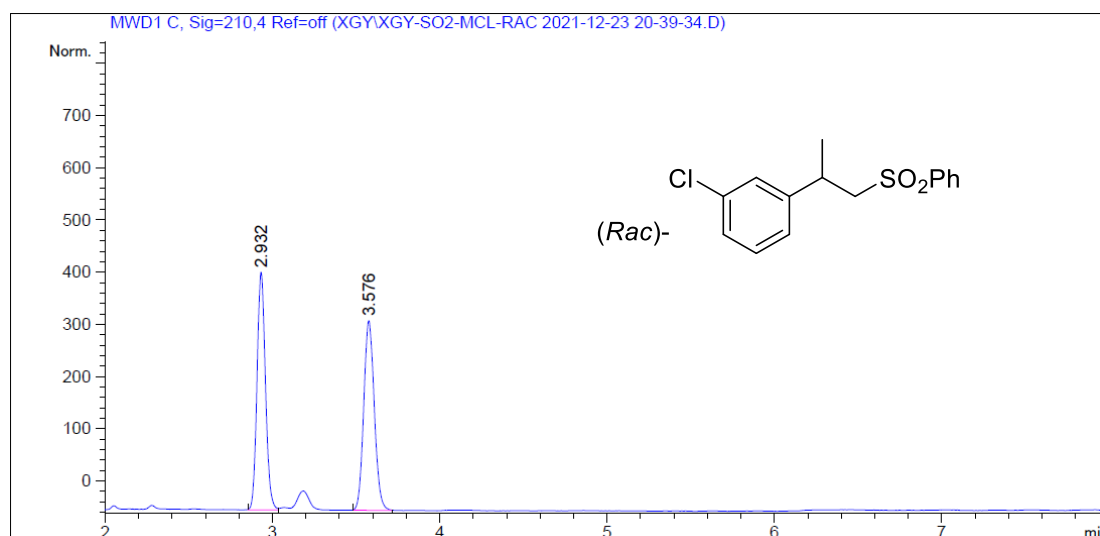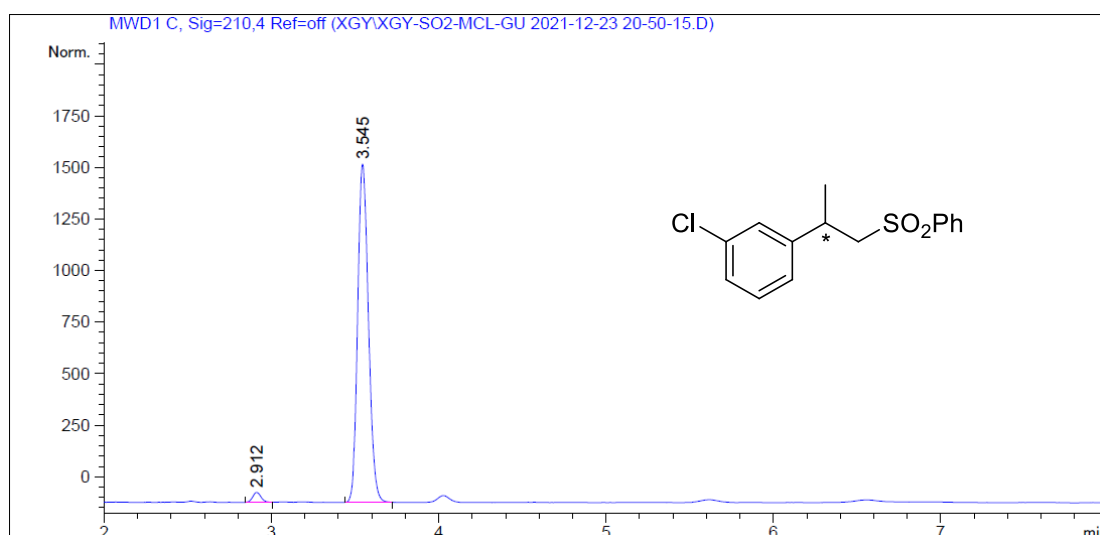

Signal 1: MWD1 C, Sig=210,4 Ref=off

| Peak # | RetTime [min] | Type | Width [min] | Area [mAU*s] | Height [mAU] | Area %  |
|--------|---------------|------|-------------|--------------|--------------|---------|
| 1      | 2.912         | BB   | 0.0531      | 137.62511    | 40.53836     | 2.1557  |
| 2      | 3.545         | BB   | 0.0698      | 6246.64551   | 1393.34827   | 97.8443 |

**(R)-1-chloro-4-(1-(phenylsulfonyl)propan-2-yl)benzene (2e)**

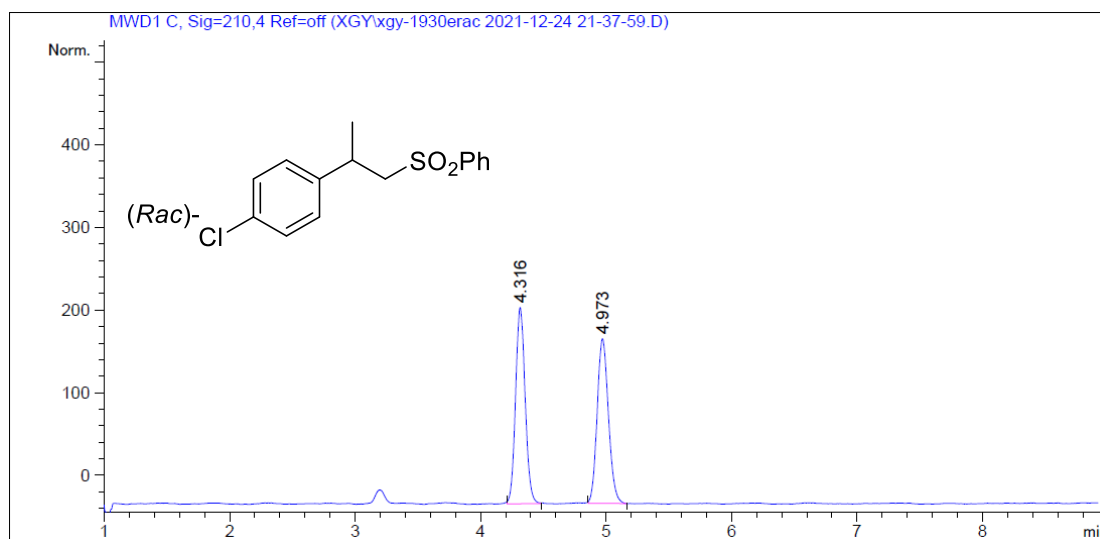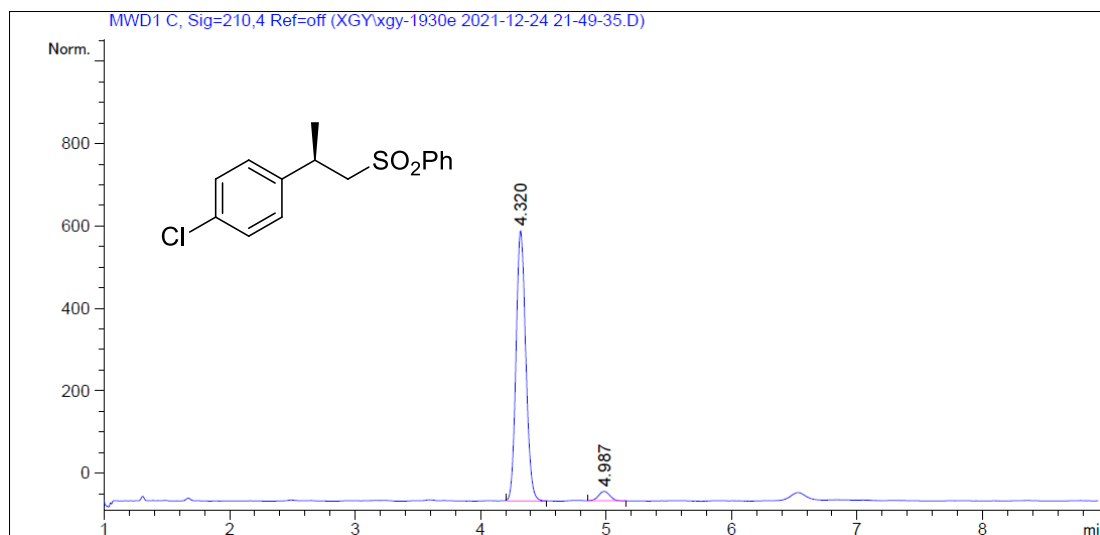

| Peak # | RetTime [min] | Type | Width [min] | Area [mAU*s] | Height [mAU] | Area %  |
|--------|---------------|------|-------------|--------------|--------------|---------|
| 1      | 4.320         | BB   | 0.0838      | 2790.52832   | 518.01605    | 96.1888 |
| 2      | 4.987         | BB   | 0.0981      | 110.56622    | 17.88206     | 3.8112  |

# 1-Bromo-3-(1-(phenylsulfonyl)propan-2-yl)benzene (**2f**)

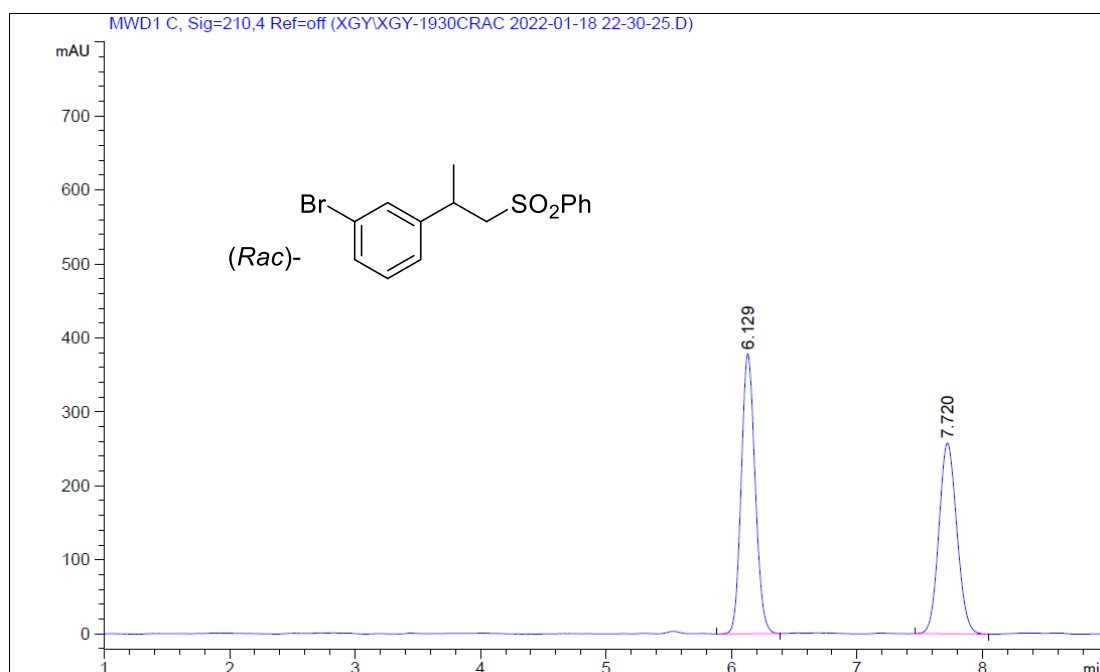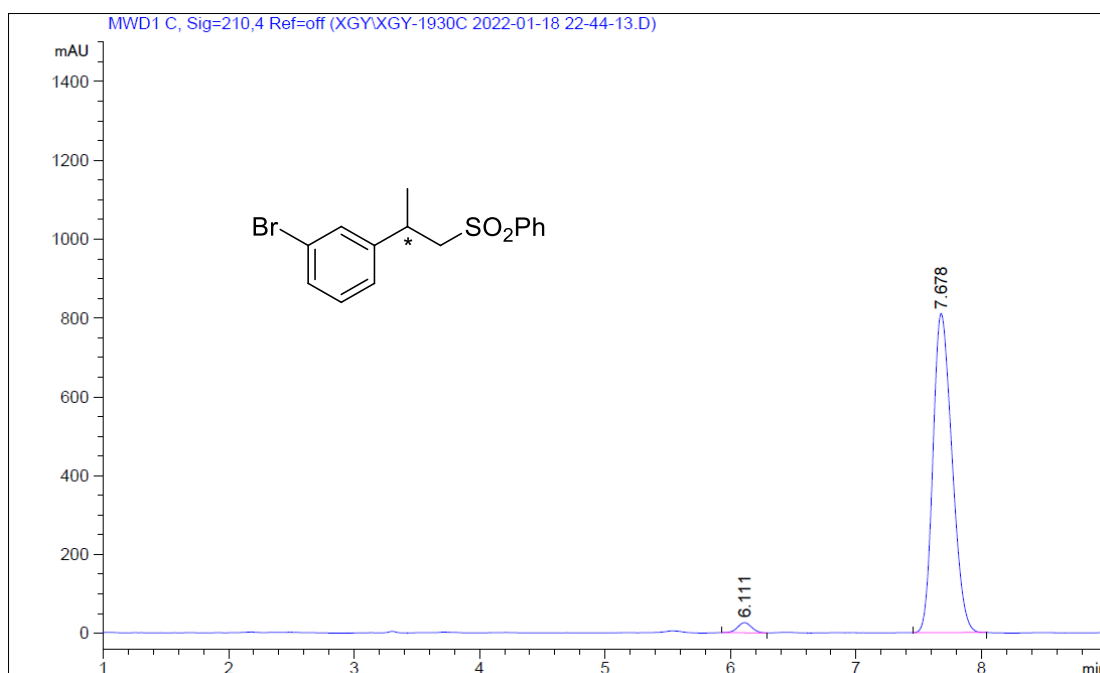

Signal 1: MWD1 C, Sig=210,4 Ref=off

| Peak # | RetTime [min] | Type | Width [min] | Area [mAU*s] | Height [mAU] | Area %  |
|--------|---------------|------|-------------|--------------|--------------|---------|
| 1      | 6.111         | BB   | 0.1171      | 201.45493    | 25.80639     | 2.3052  |
| 2      | 7.678         | BB   | 0.1616      | 8537.56348   | 809.39941    | 97.6948 |

# 1-Bromo-4-(1-(phenylsulfonyl)propan-2-yl)benzene (2g)

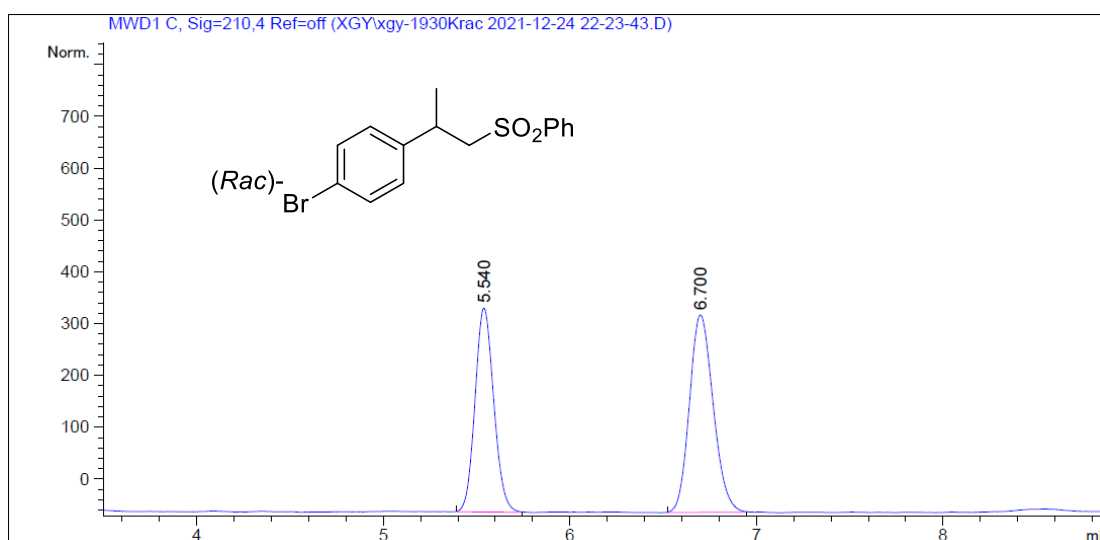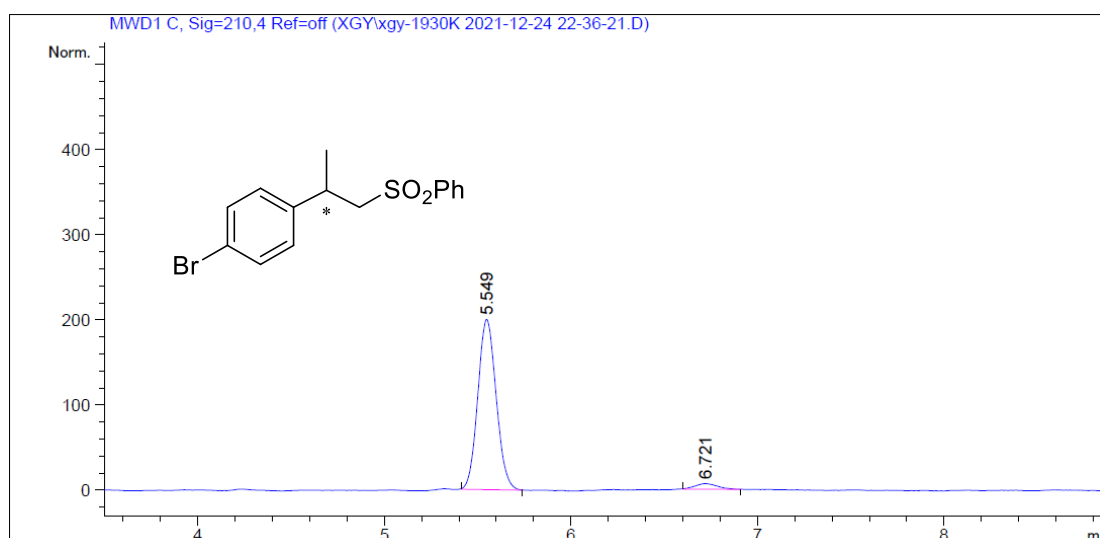

Signal 1: MWD1 C, Sig=210,4 Ref=off

| Peak # | RetTime [min] | Type | Width [min] | Area [mAU*s] | Height [mAU] | Area %  |
|--------|---------------|------|-------------|--------------|--------------|---------|
| 1      | 5.549         | BB   | 0.1074      | 1369.08960   | 199.91602    | 96.1020 |
| 2      | 6.721         | BB   | 0.1014      | 55.53214     | 6.65008      | 3.8980  |

# 1-Methoxy-2-(1-(phenylsulfonyl)propan-2-yl)benzene (**2h**)

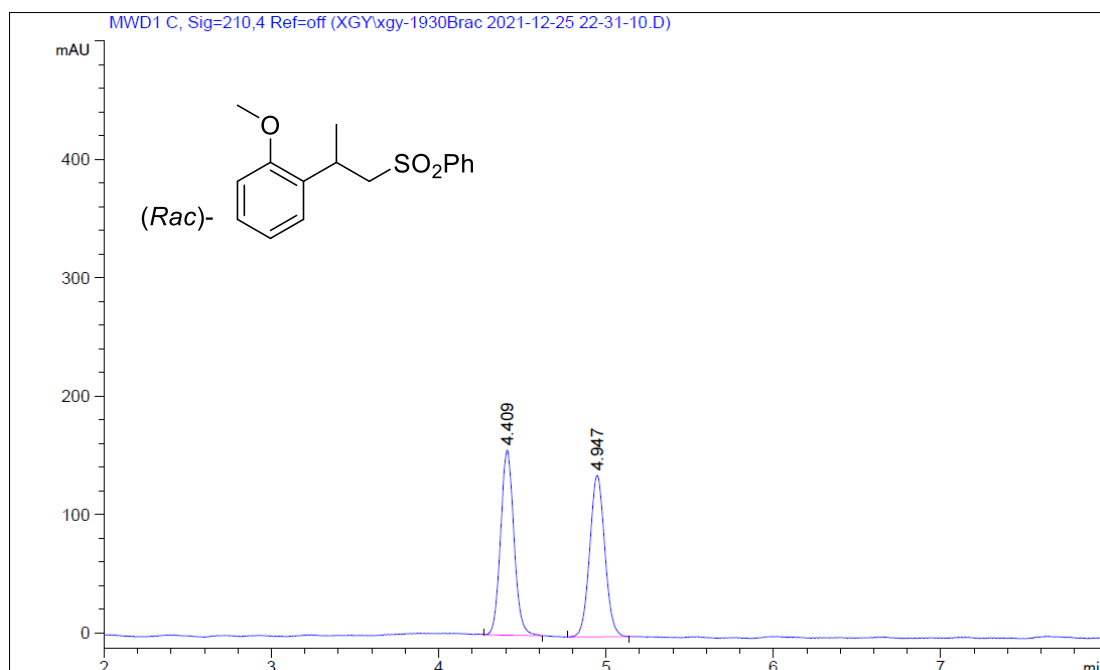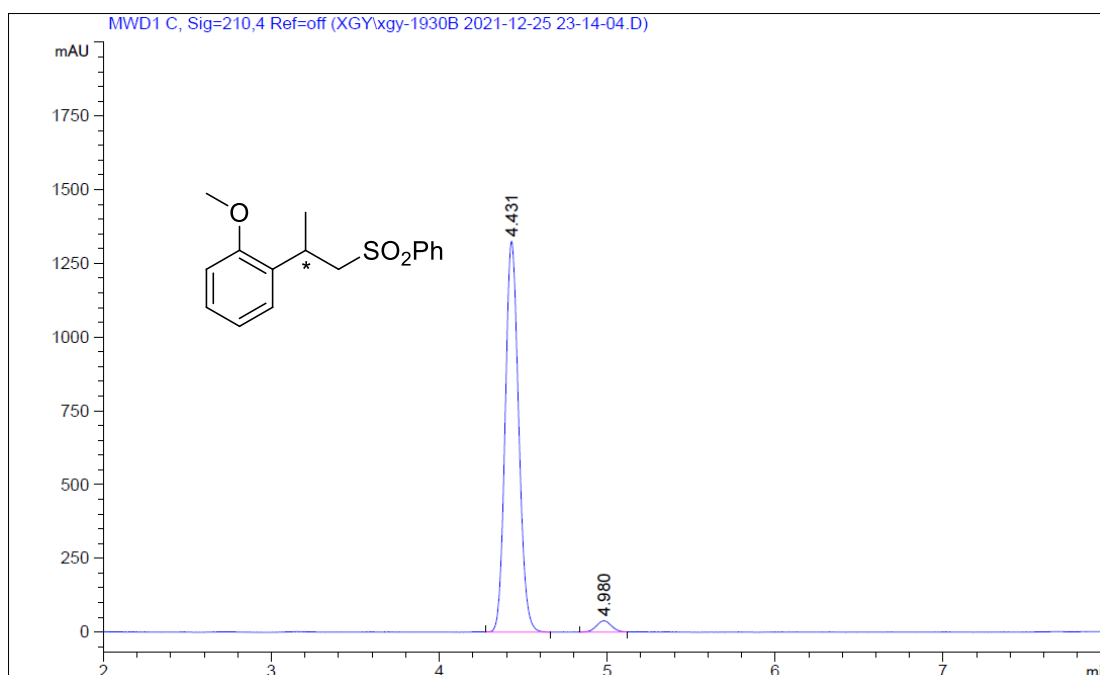

Signal 1: MWD1 C, Sig=210,4 Ref=off

| Peak # | RetTime [min] | Type | Width [min] | Area [mAU*s] | Height [mAU] | Area %  |
|--------|---------------|------|-------------|--------------|--------------|---------|
| 1      | 4.431         | VV R | 0.0862      | 7409.10791   | 1325.61169   | 96.8916 |
| 2      | 4.980         | VV R | 0.0777      | 237.69336    | 38.39271     | 3.1084  |

# 1-Methoxy-3-(1-(phenylsulfonyl)propan-2-yl)benzene (2i)

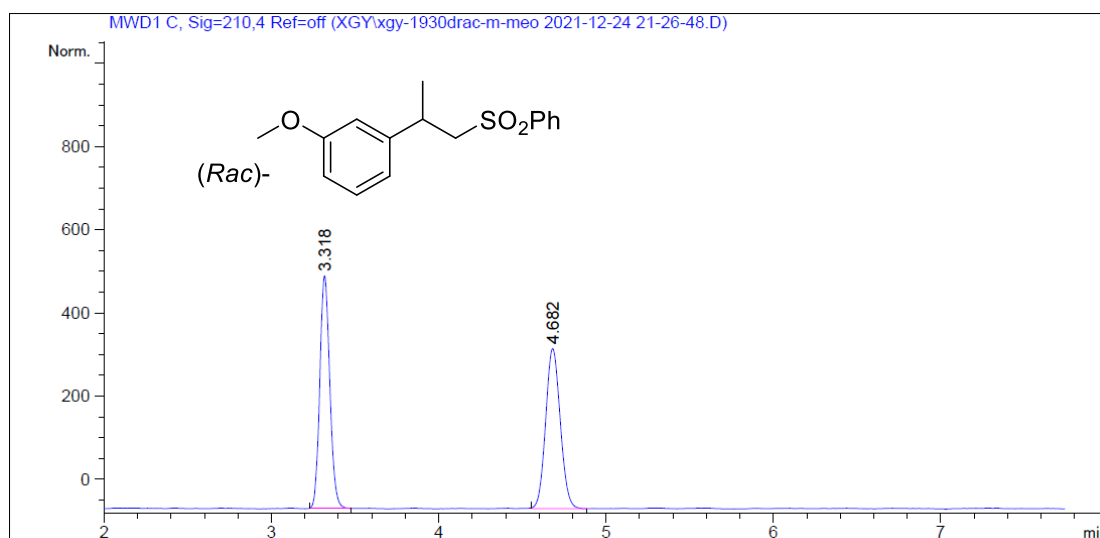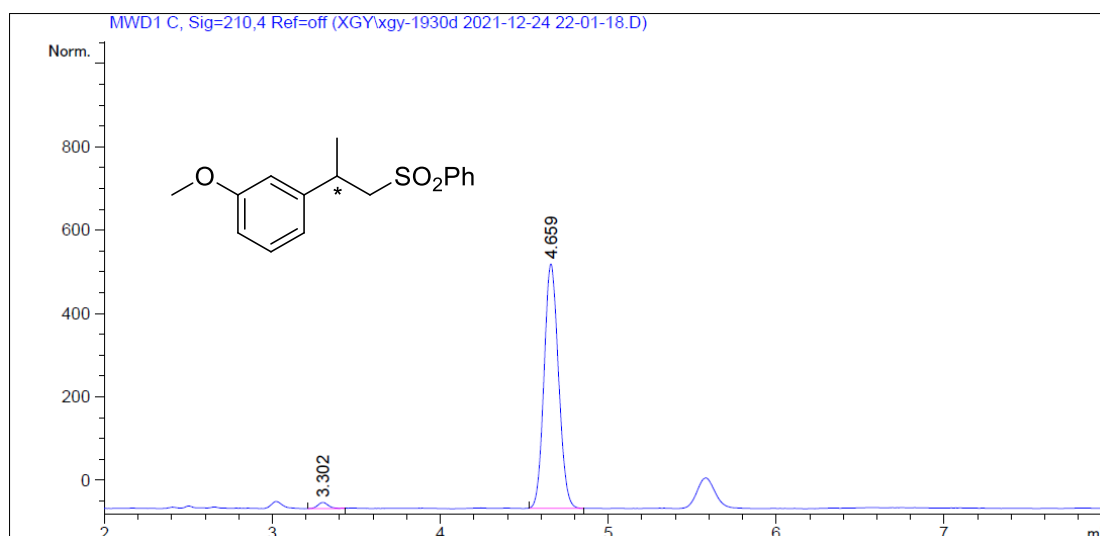

Signal 1: MWD1 C, Sig=210,4 Ref=off

| Peak # | RetTime [min] | Type | Width [min] | Area [mAU*s] | Height [mAU] | Area %  |
|--------|---------------|------|-------------|--------------|--------------|---------|
| 1      | 3.302         | BB   | 0.0645      | 47.55404     | 10.97623     | 1.7555  |
| 2      | 4.659         | BB   | 0.0928      | 2661.29272   | 444.53748    | 98.2445 |

*(R)*-1-methyl-4-(1-(phenylsulfonyl)propan-2-yl)benzene (**2j**)

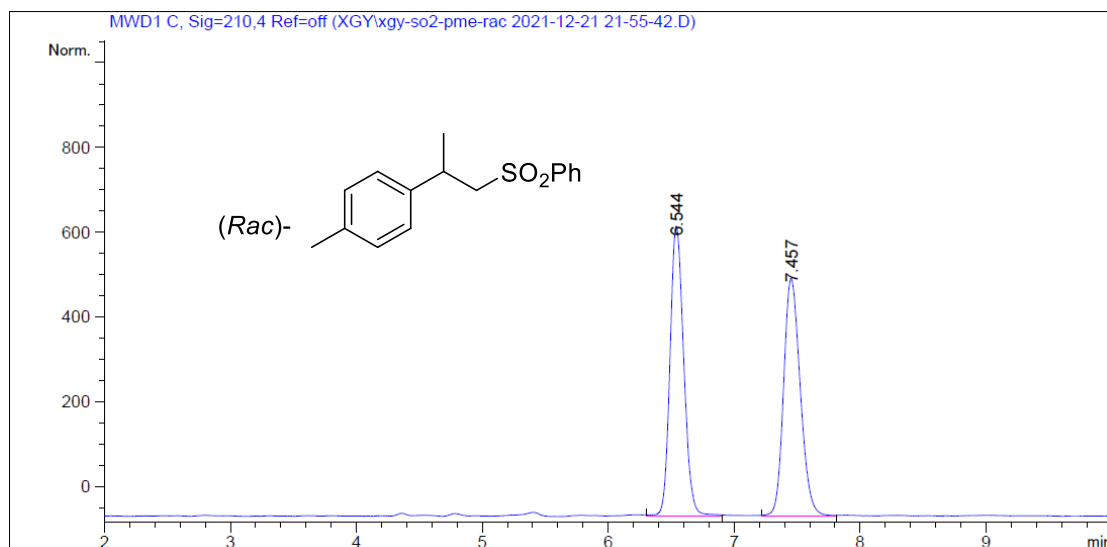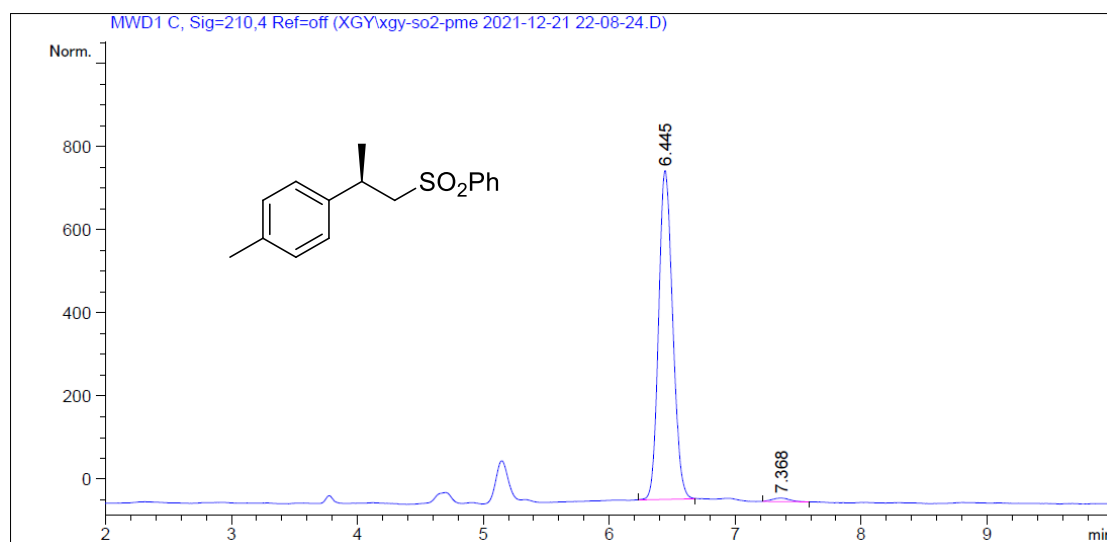

Signal 1: MWD1 C, Sig=210,4 Ref=off

| Peak # | RetTime [min] | Type | Width [min] | Area [mAU*s] | Height [mAU] | Area %  |
|--------|---------------|------|-------------|--------------|--------------|---------|
| 1      | 6.445         | BB   | 0.1211      | 5206.78857   | 670.57794    | 98.6587 |
| 2      | 7.368         | BB   | 0.1178      | 70.78779     | 7.35318      | 1.3413  |



# 1-Methyl-2-(1-(phenylsulfonyl)propan-2-yl)benzene (2k)

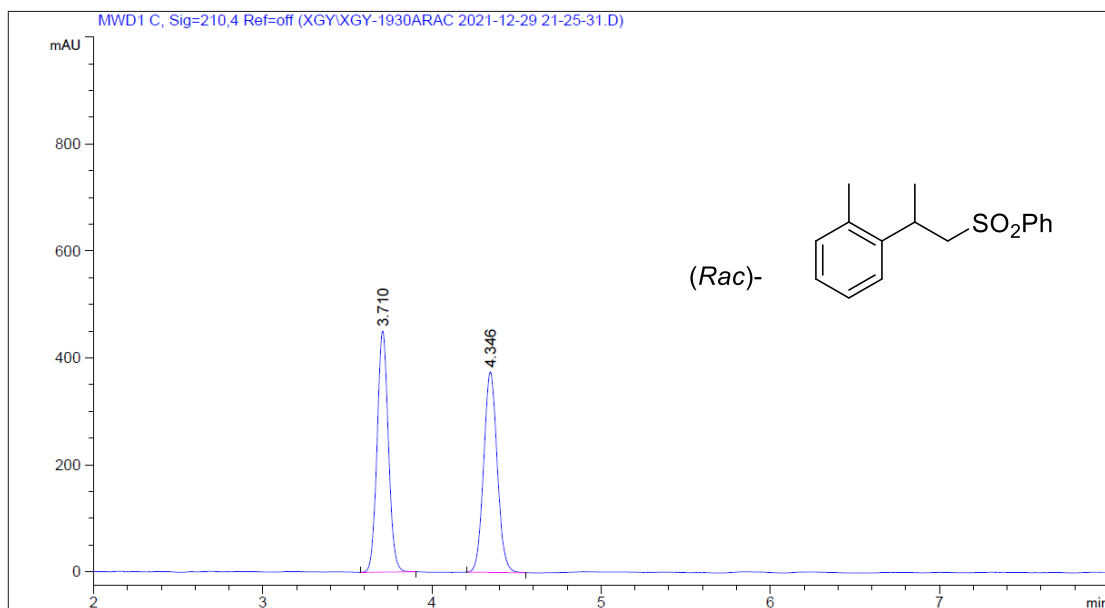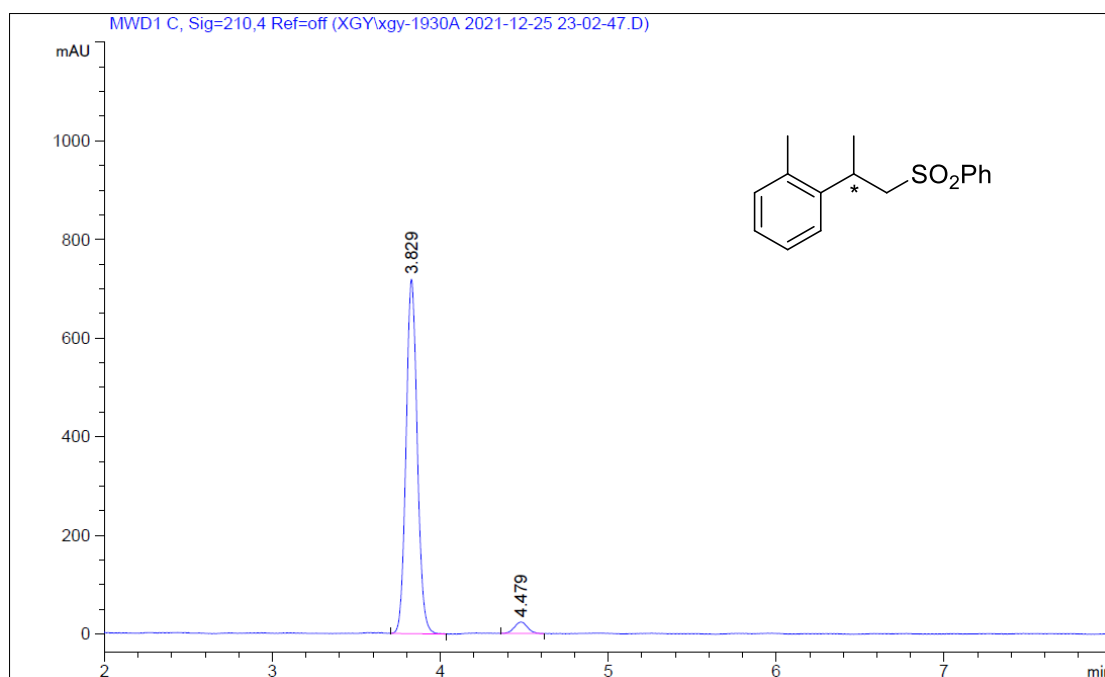

Signal 1: MWD1 C, Sig=210,4 Ref=off

| Peak # | RetTime [min] | Type | Width [min] | Area [mAU*s] | Height [mAU] | Area %  |
|--------|---------------|------|-------------|--------------|--------------|---------|
| 1      | 3.829         | BV R | 0.0712      | 3337.61011   | 718.83392    | 96.3407 |
| 2      | 4.479         | VV R | 0.0734      | 126.77312    | 23.50399     | 3.6593  |

(R)-((2-phenylpropyl)sulfonyl)benzene (**21**)

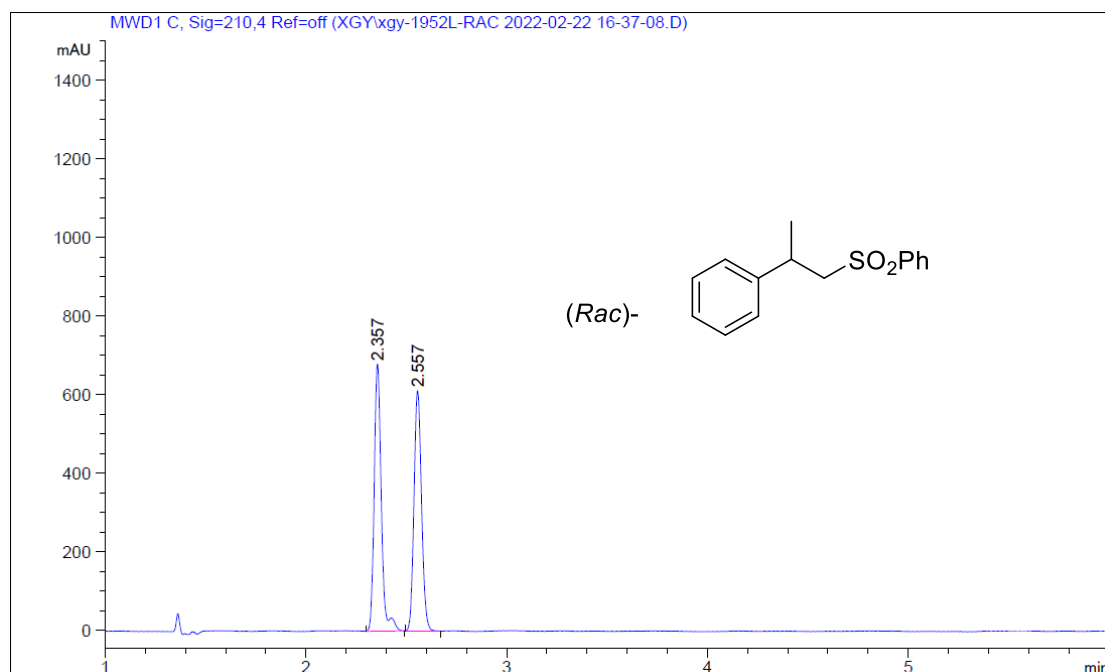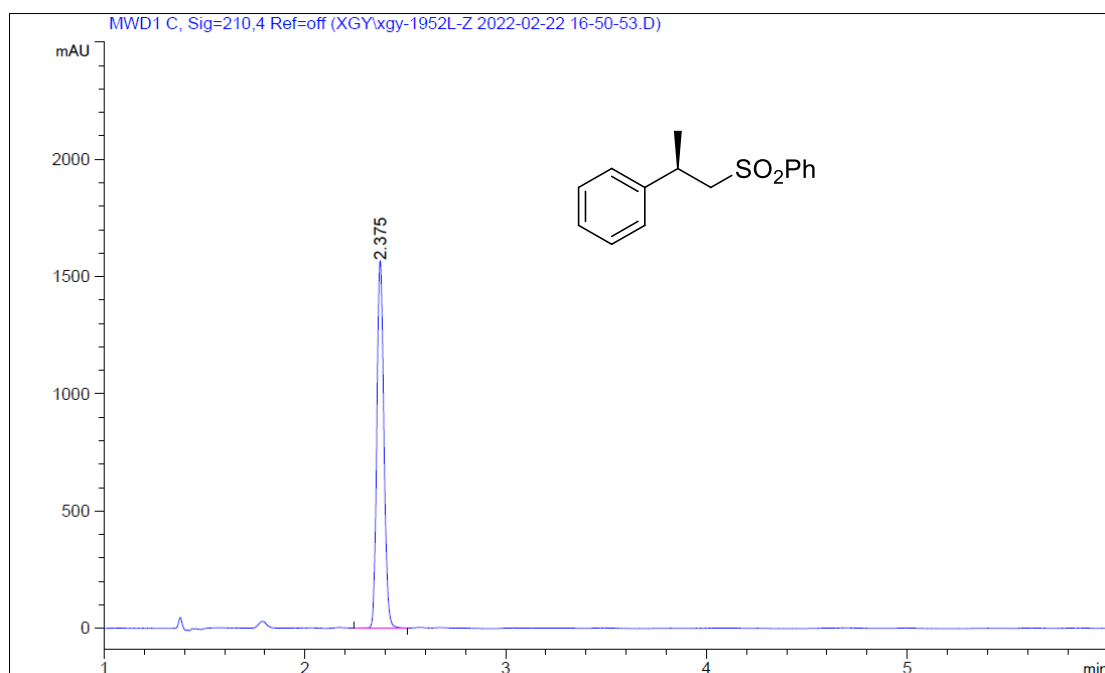

Signal 1: MWD1 C, Sig=210,4 Ref=off

| Peak # | RetTime [min] | Type | Width [min] | Area [mAU*s] | Height [mAU] | Area %   |
|--------|---------------|------|-------------|--------------|--------------|----------|
| 1      | 2.375         | BB   | 0.0388      | 3830.64575   | 1550.33508   | 100.0000 |

((2-Phenylbutyl)sulfonyl)benzene (2m)

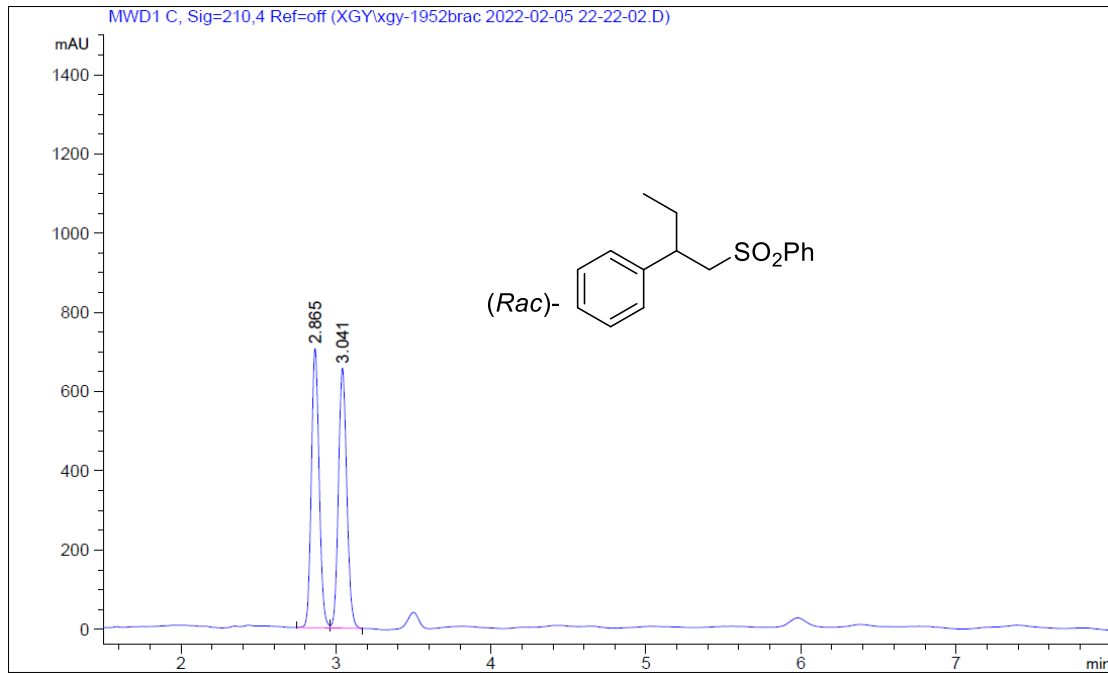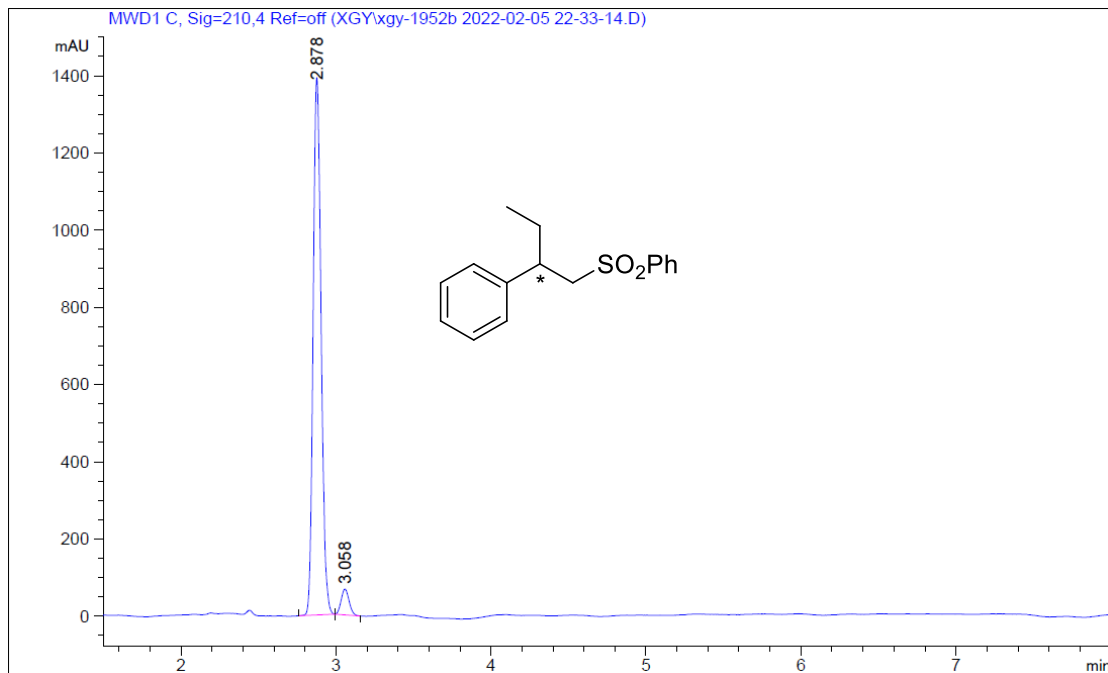

Signal 1: MWD1 C, Sig=210,4 Ref=off

| Peak # | RetTime [min] | Type | Width [min] | Area [mAU*s] | Height [mAU] | Area %  |
|--------|---------------|------|-------------|--------------|--------------|---------|
| 1      | 2.878         | BB   | 0.0561      | 4963.22998   | 1392.55737   | 95.4108 |
| 2      | 3.058         | BB   | 0.0565      | 238.73029    | 67.08261     | 4.5892  |

(1-Cyclohexyl-2-(phenylsulfonyl)ethyl)benzene (**2n**)

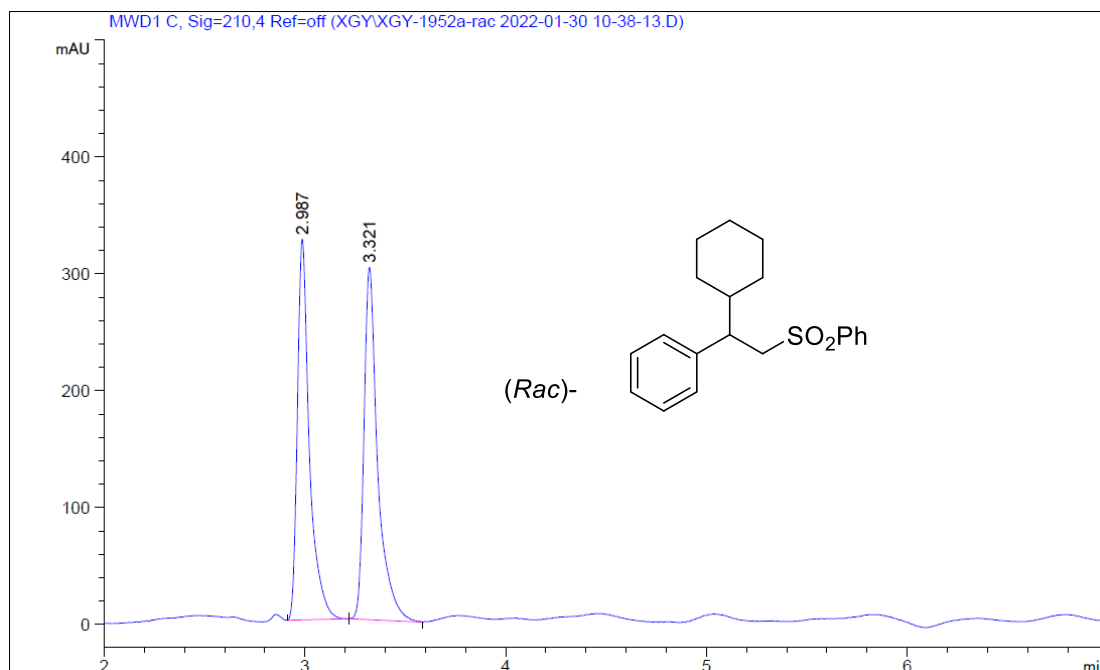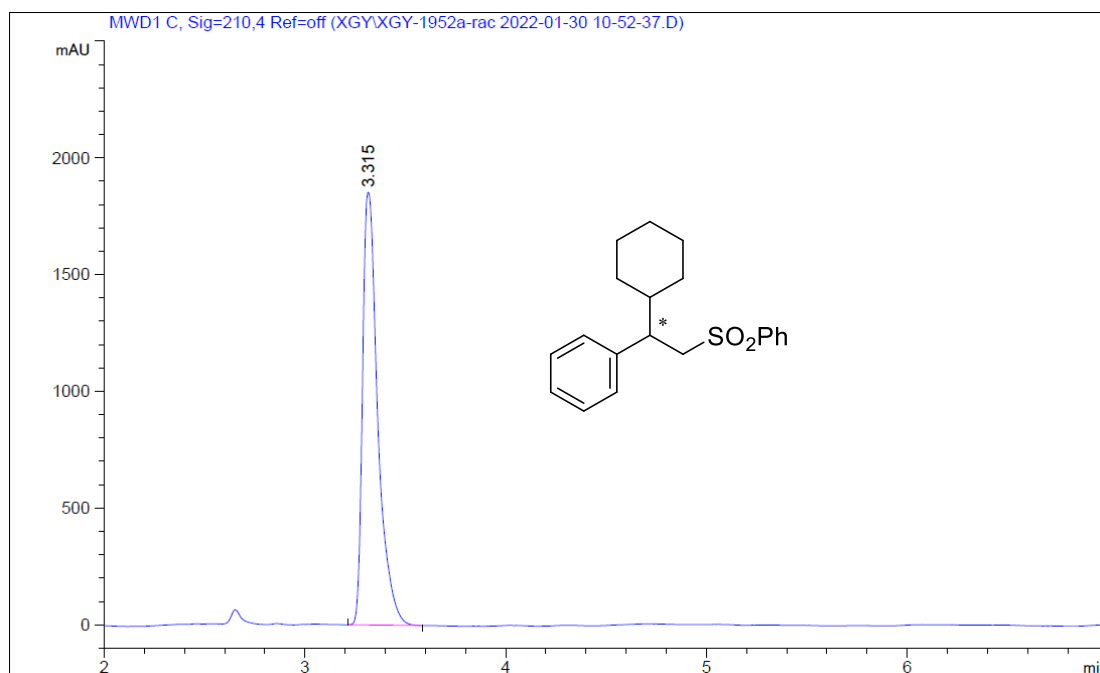

Signal 1: MWD1 C, Sig=210,4 Ref=off

| Peak # | RetTime [min] | Type | Width [min] | Area [mAU*s] | Height [mAU] | Area %   |
|--------|---------------|------|-------------|--------------|--------------|----------|
| 1      | 3.315         | BB   | 0.0794      | 9746.99609   | 1852.45313   | 100.0000 |

# 1-(1-(Phenylsulfonyl)propan-2-yl)naphthalene (**2o**)

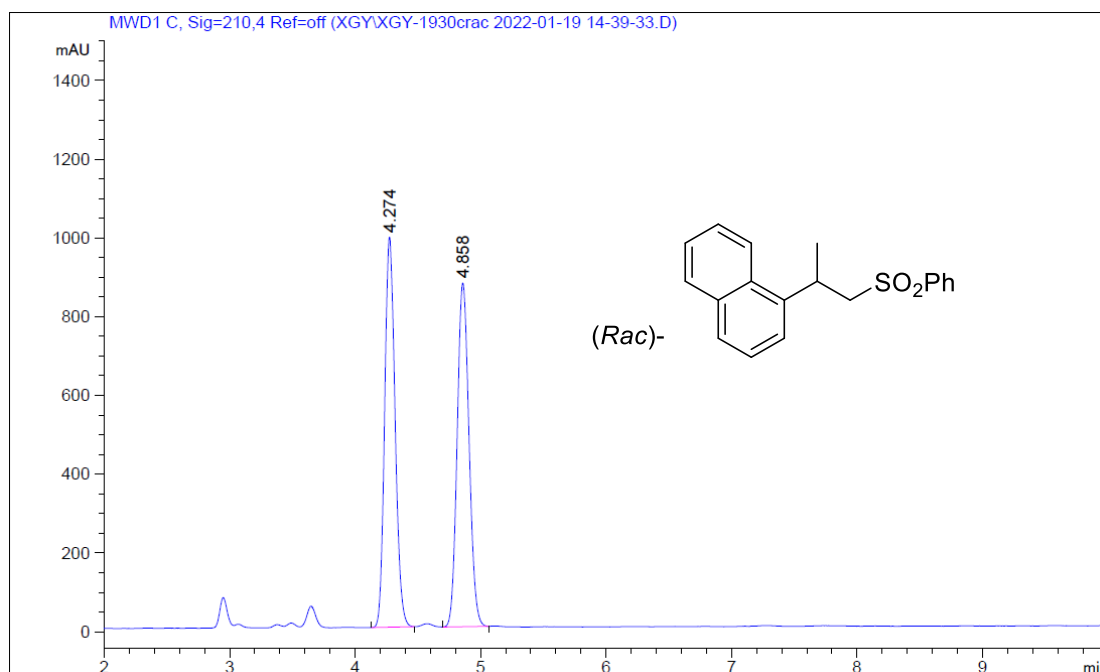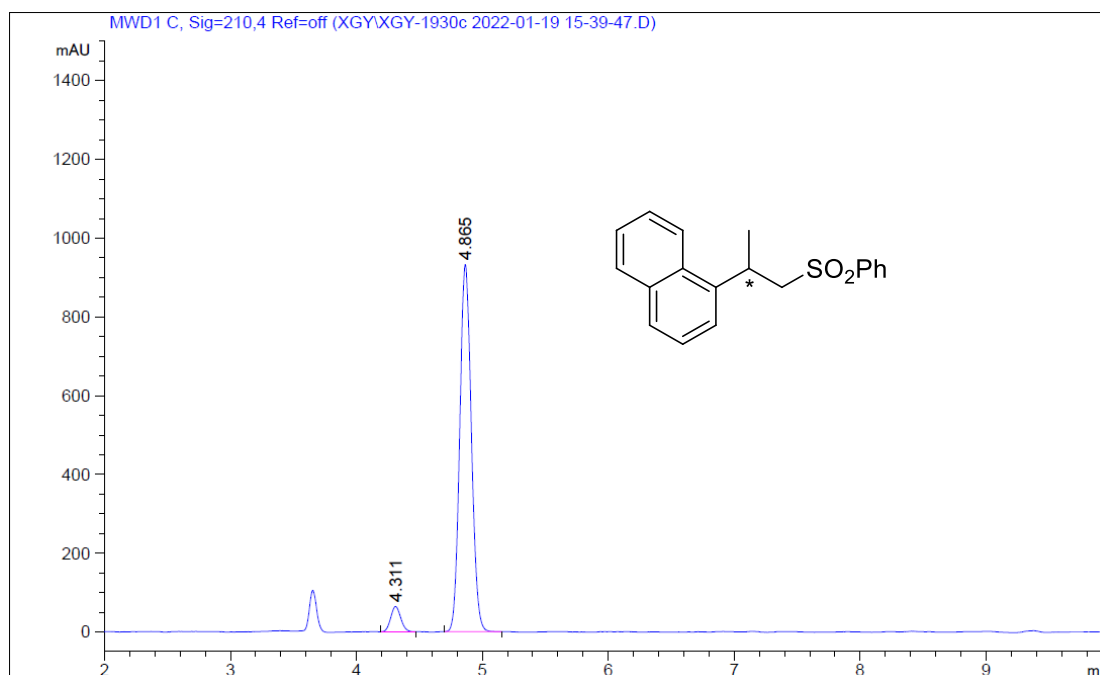

Signal 1: MWD1 C, Sig=210,4 Ref=off

| Peak # | RetTime [min] | Type | Width [min] | Area [mAU*s] | Height [mAU] | Area %  |
|--------|---------------|------|-------------|--------------|--------------|---------|
| 1      | 4.311         | BB   | 0.0868      | 357.13080    | 64.28927     | 5.6516  |
| 2      | 4.865         | BB   | 0.1011      | 5961.92969   | 932.38525    | 94.3484 |

2-(1-(Phenylsulfonyl)propan-2-yl)naphthalene (**2p**)

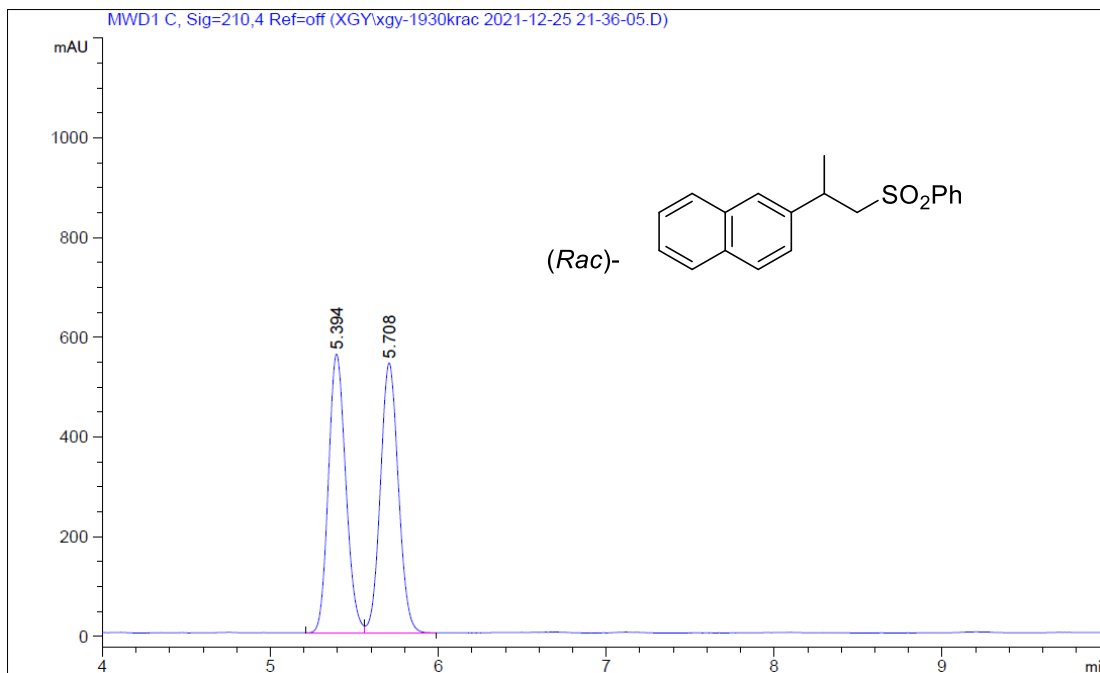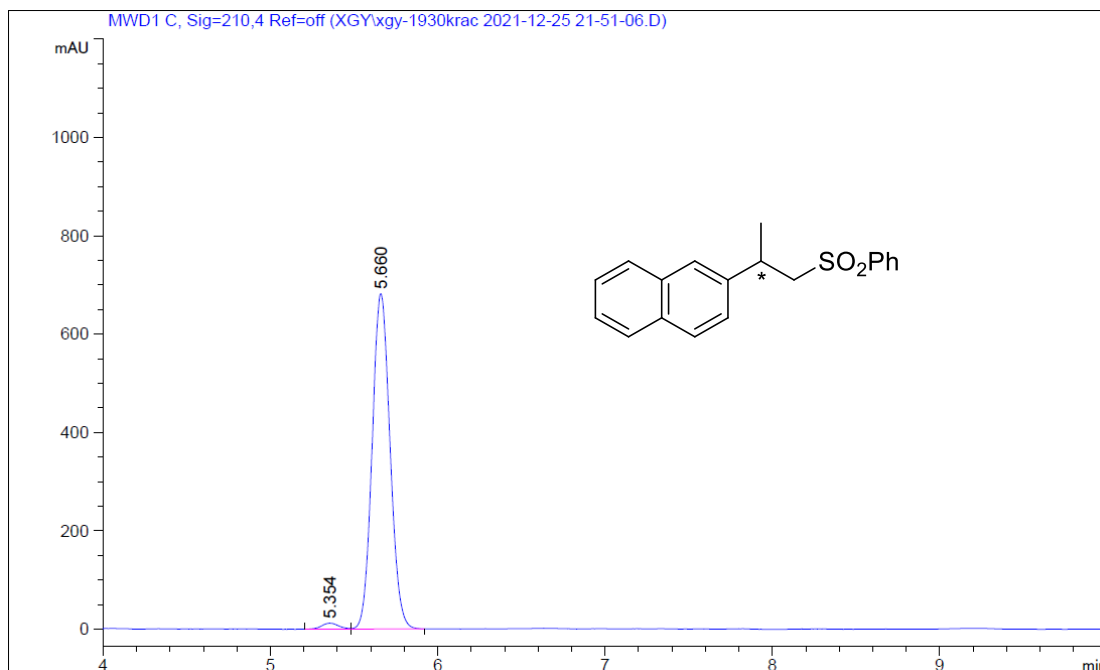

Signal 1: MWD1 C, Sig=210,4 Ref=off

| Peak # | RetTime [min] | Type | Width [min] | Area [mAU*s] | Height [mAU] | Area %  |
|--------|---------------|------|-------------|--------------|--------------|---------|
| 1      | 5.354         | VV R | 0.0900      | 86.67672     | 12.11042     | 1.6817  |
| 2      | 5.660         | VV R | 0.1152      | 5067.42188   | 682.26141    | 98.3183 |

# ((2-Phenylbutyl)sulfonyl)benzene (2q)

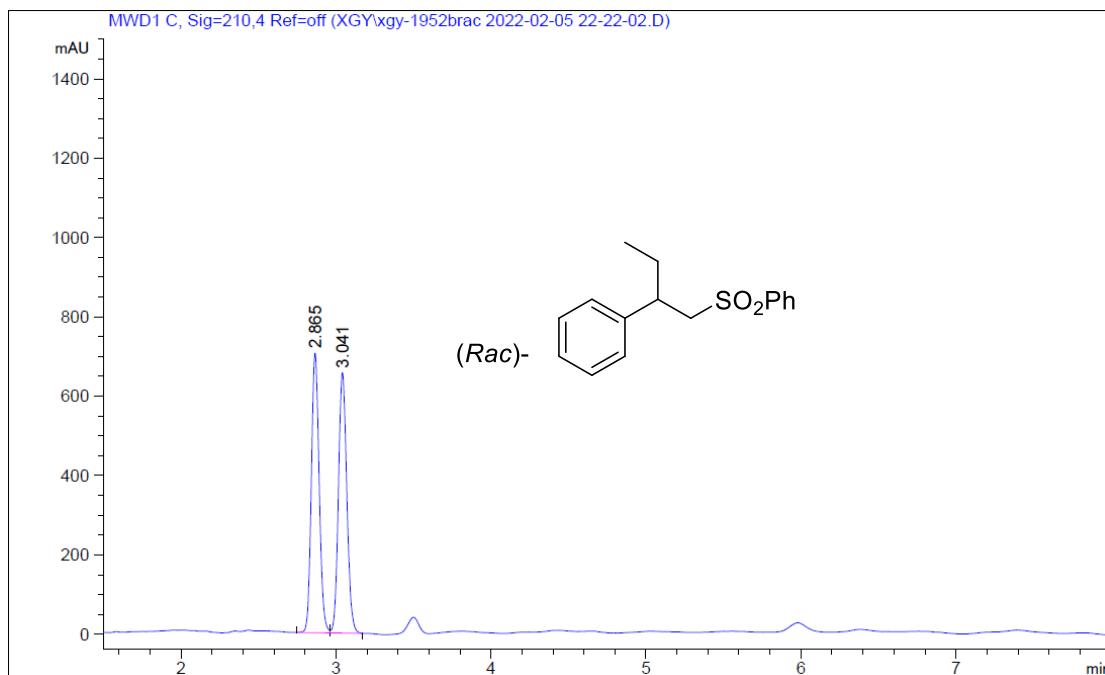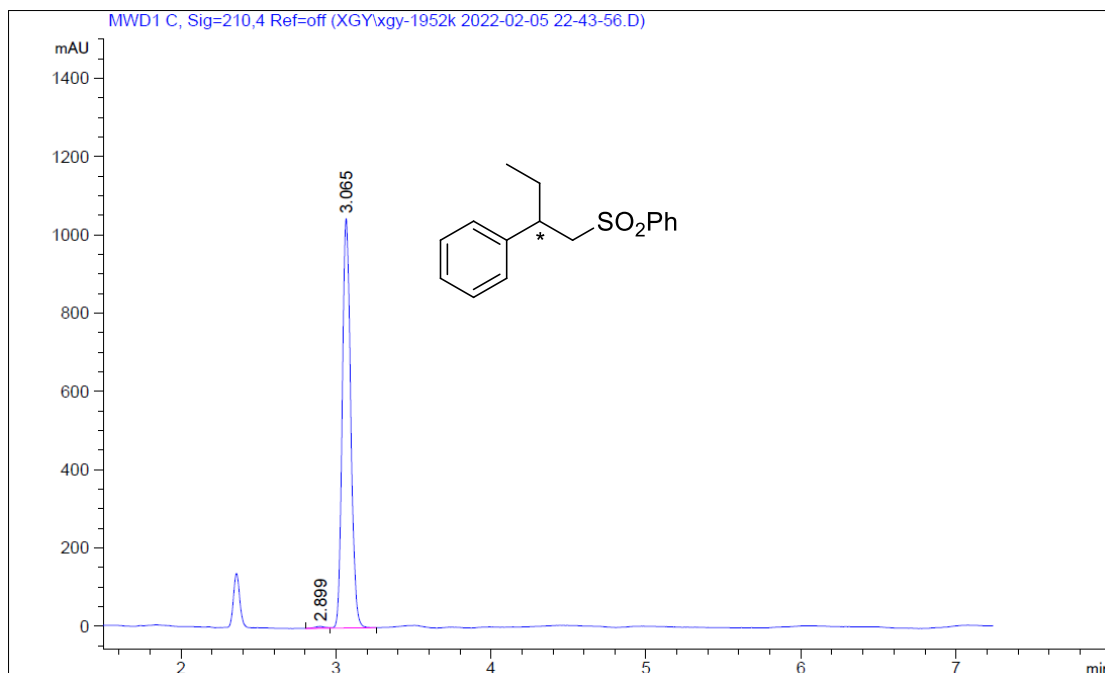

Signal 1: MWD1 C, Sig=210,4 Ref=off

| Peak # | RetTime [min] | Type | Width [min] | Area [mAU*s] | Height [mAU] | Area %  |
|--------|---------------|------|-------------|--------------|--------------|---------|
| 1      | 2.899         | BV E | 0.0572      | 21.39146     | 4.60173      | 0.5347  |
| 2      | 3.065         | VV R | 0.0594      | 3978.92700   | 1046.16272   | 99.4653 |

# 1-Fluoro-4-((2-phenylpropyl)sulfonyl)benzene (**2r**)

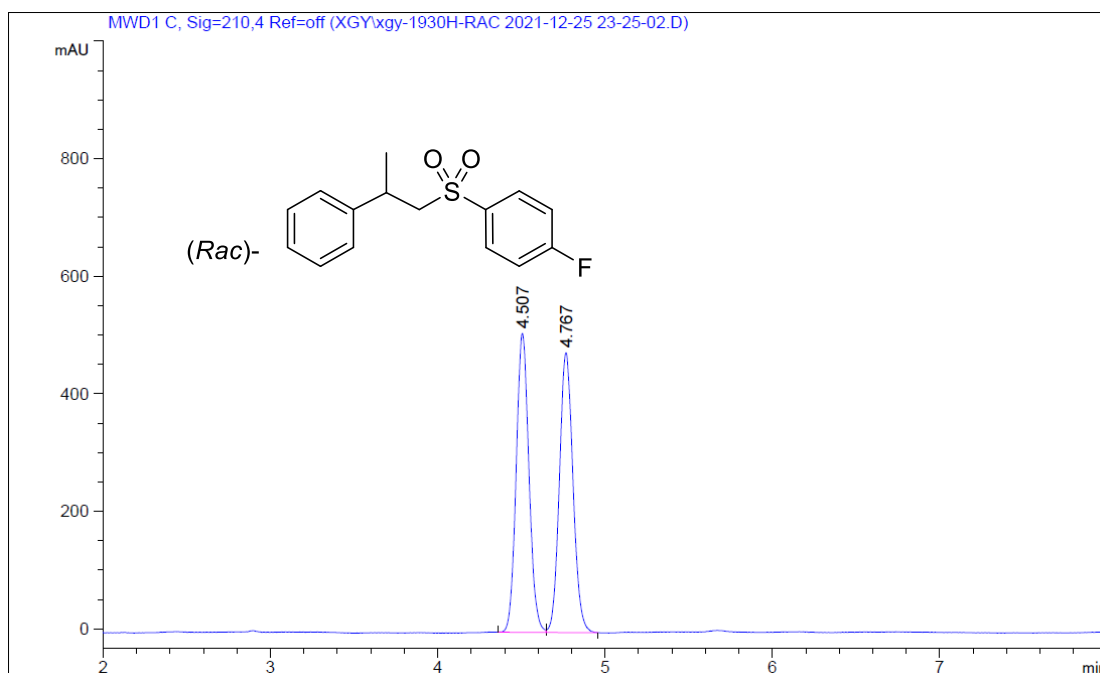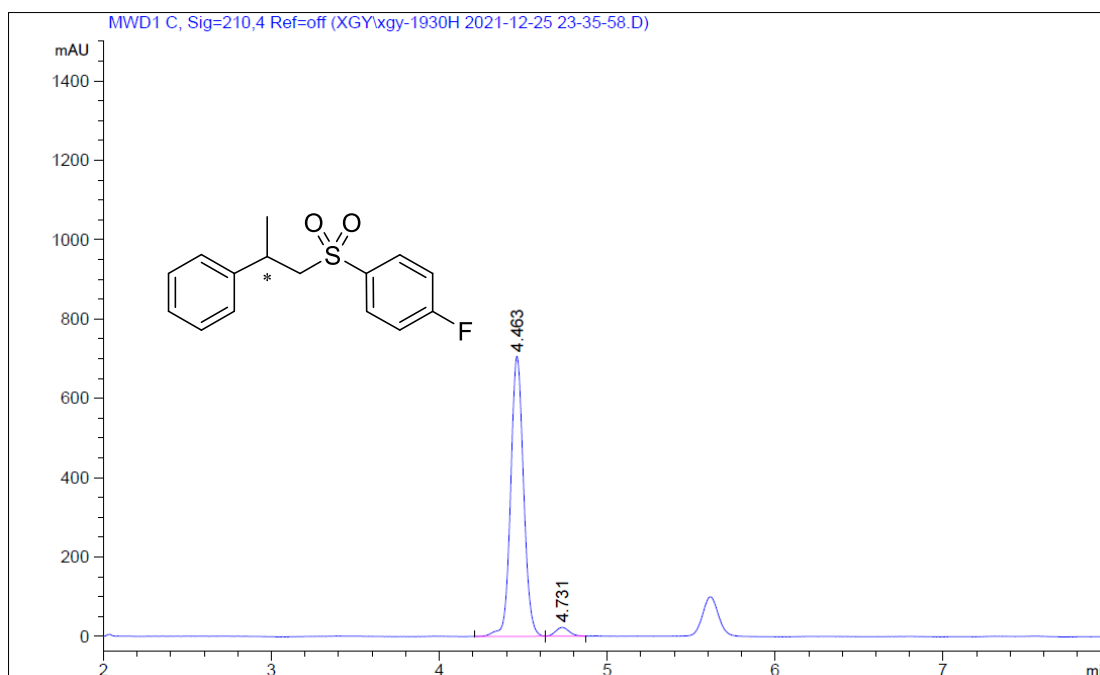

Signal 1: MWD1 C, Sig=210,4 Ref=off

| Peak # | RetTime [min] | Type | Width [min] | Area [mAU*s] | Height [mAU] | Area %  |
|--------|---------------|------|-------------|--------------|--------------|---------|
| 1      | 4.463         | VV R | 0.0830      | 3777.97437   | 705.66827    | 96.7882 |
| 2      | 4.731         | VV R | 0.0709      | 125.36704    | 22.36466     | 3.2118  |



# 1-Chloro-4-((2-phenylpropyl)sulfonyl)benzene (**2s**)

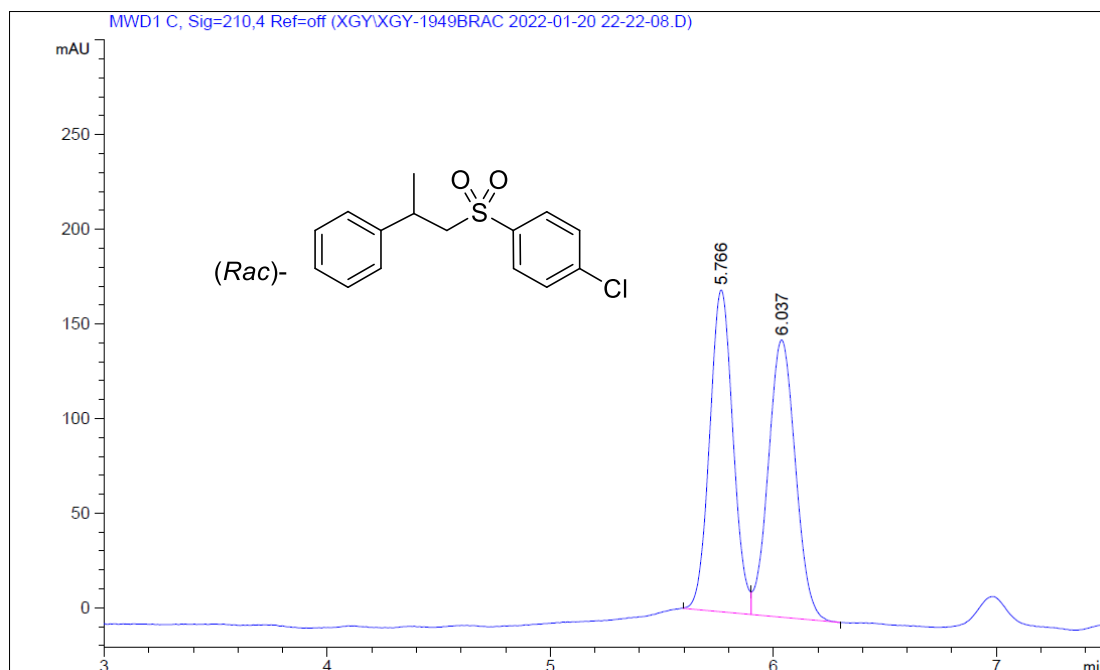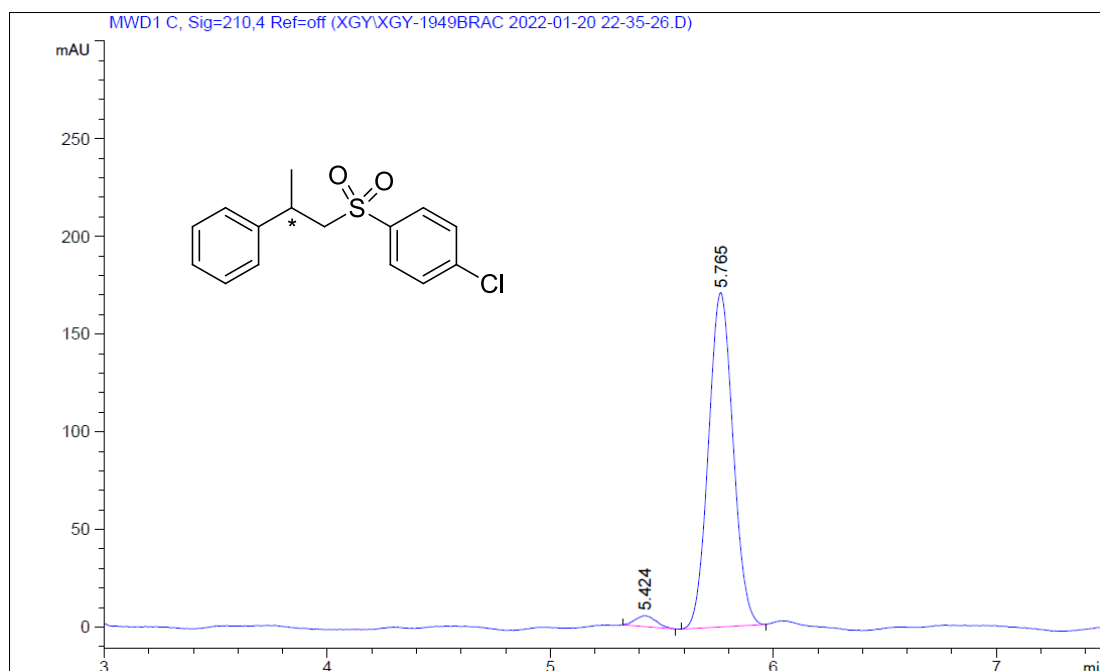

Signal 1: MWD1 C, Sig=210,4 Ref=off

| Peak # | RetTime [min] | Type | Width [min] | Area [mAU*s] | Height [mAU] | Area %  |
|--------|---------------|------|-------------|--------------|--------------|---------|
| 1      | 5.424         | BB   | 0.0780      | 36.73730     | 5.74934      | 2.7246  |
| 2      | 5.765         | BB   | 0.1204      | 1311.61792   | 171.18588    | 97.2754 |

# 1-Fluoro-3-(1-phenyl-2-(phenylsulfonyl)ethyl)benzene (4a)

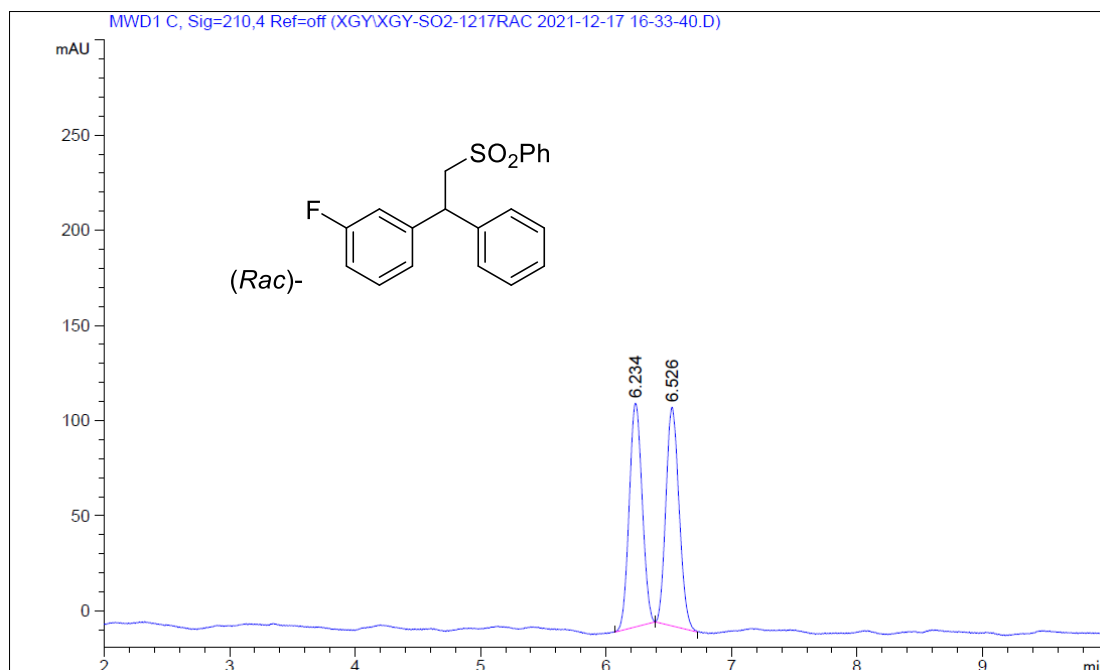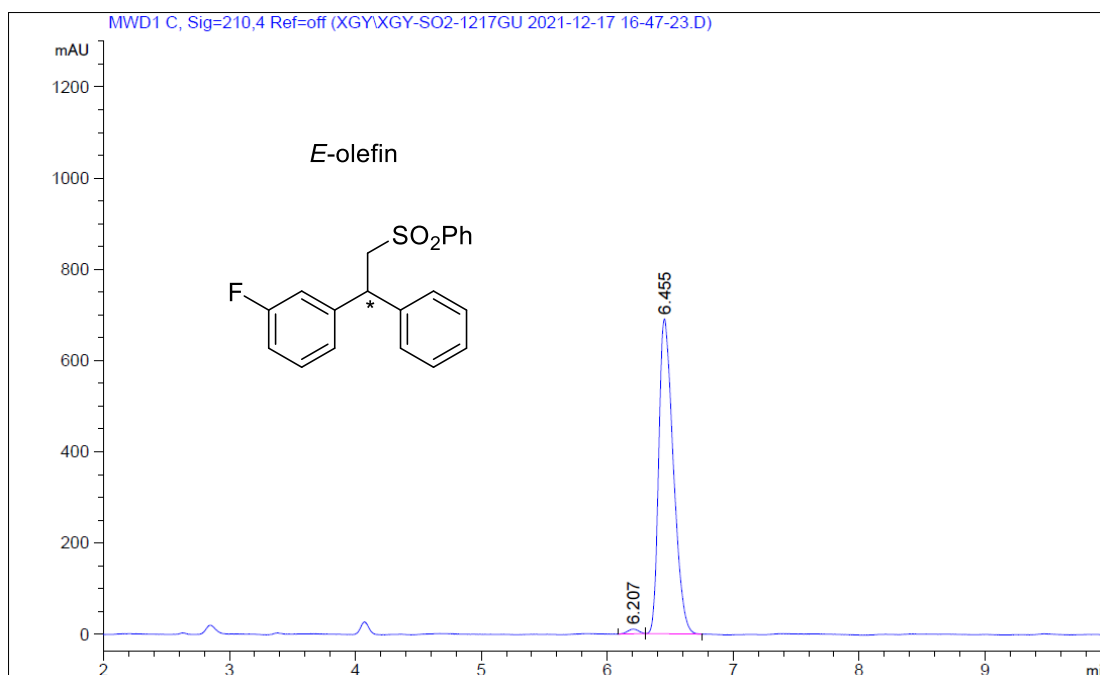

Signal 1: MWD1 C, Sig=210,4 Ref=off

| Peak # | RetTime [min] | Type | Width [min] | Area [mAU*s] | Height [mAU] | Area %  |
|--------|---------------|------|-------------|--------------|--------------|---------|
| 1      | 6.207         | BB   | 0.0748      | 62.70038     | 10.41199     | 1.1179  |
| 2      | 6.455         | BB   | 0.1183      | 5546.20654   | 690.14642    | 98.8821 |

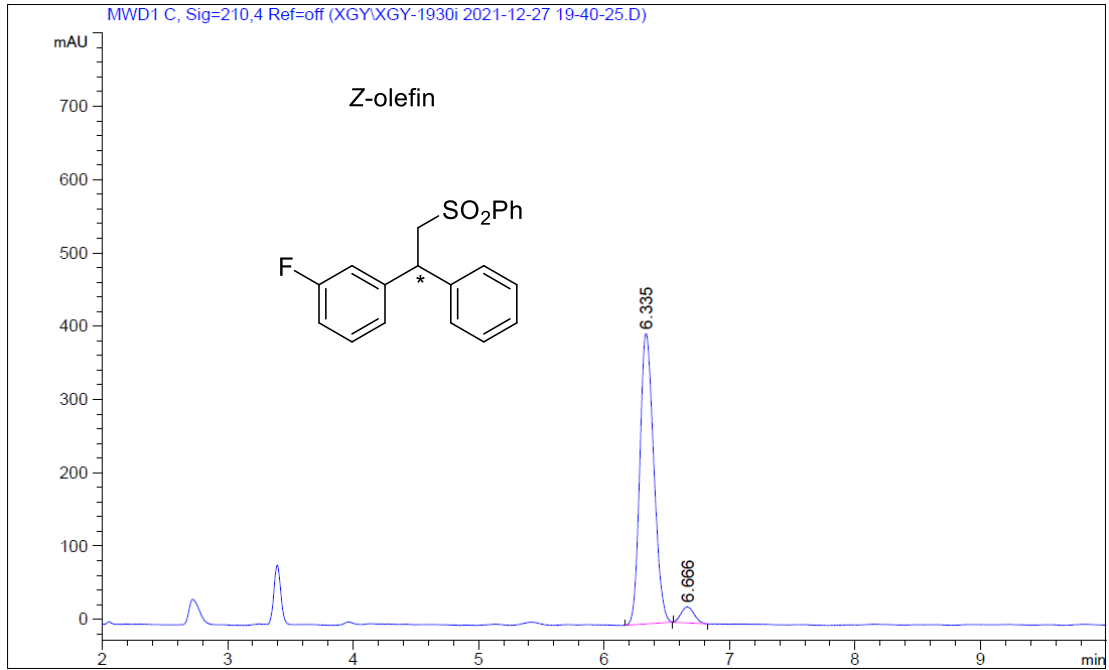

Signal 1: MWD1 C, Sig=210,4 Ref=off

| Peak # | RetTime [min] | Type | Width [min] | Area [mAU*s] | Height [mAU] | Area %  |
|--------|---------------|------|-------------|--------------|--------------|---------|
| 1      | 6.335         | BB   | 0.1145      | 3056.06982   | 396.06067    | 95.0724 |
| 2      | 6.666         | BB   | 0.0879      | 158.39606    | 22.01792     | 4.9276  |

# 1-Fluoro-4-(1-phenyl-2-(phenylsulfonyl)ethyl)benzene (**4b**)

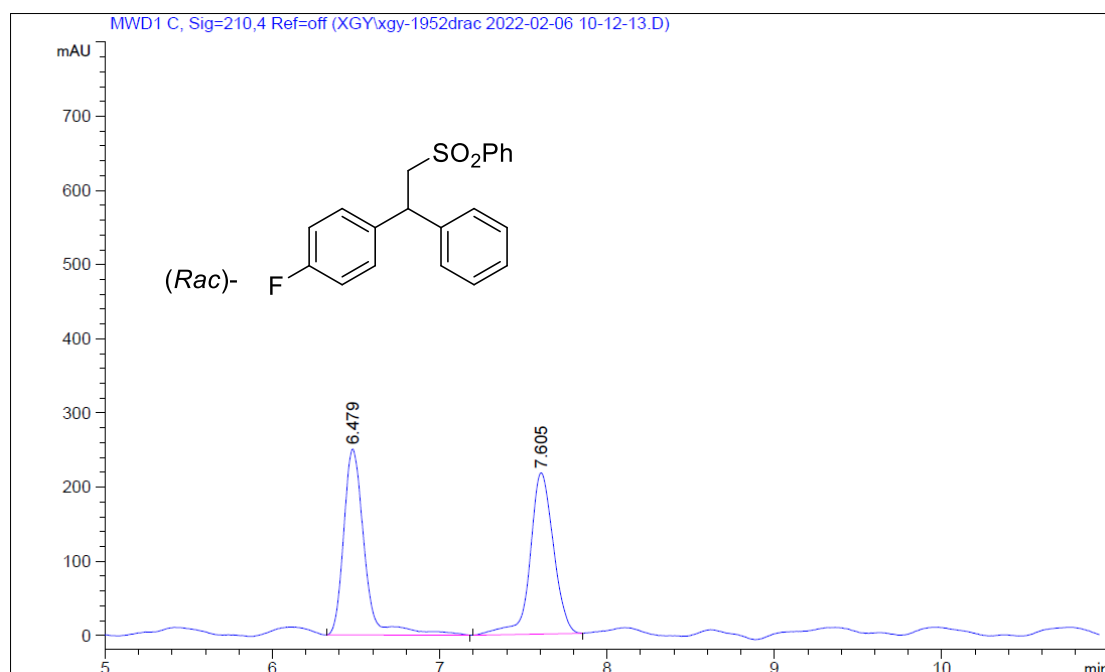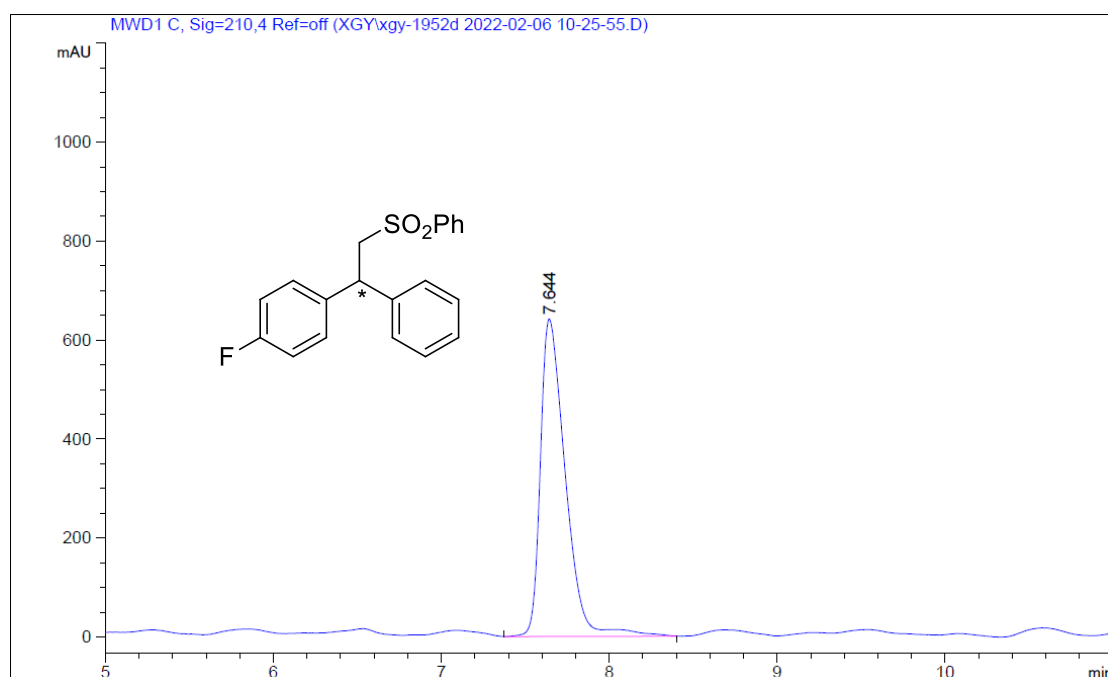

Signal 1: MWD1 C, Sig=210,4 Ref=off

| Peak # | RetTime [min] | Type | Width [min] | Area [mAU*s] | Height [mAU] | Area %   |
|--------|---------------|------|-------------|--------------|--------------|----------|
| 1      | 7.644         | BB   | 0.1568      | 6643.99414   | 641.76239    | 100.0000 |

# 1-Chloro-4-(1-phenyl-2-(phenylsulfonyl)ethyl)benzene (**4c**)

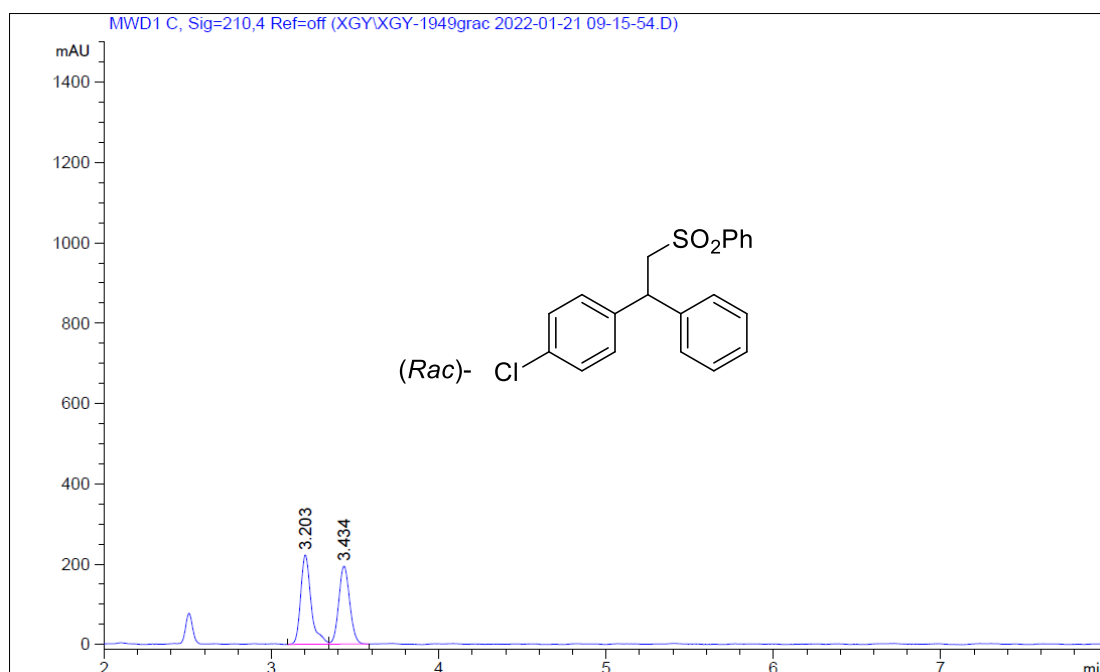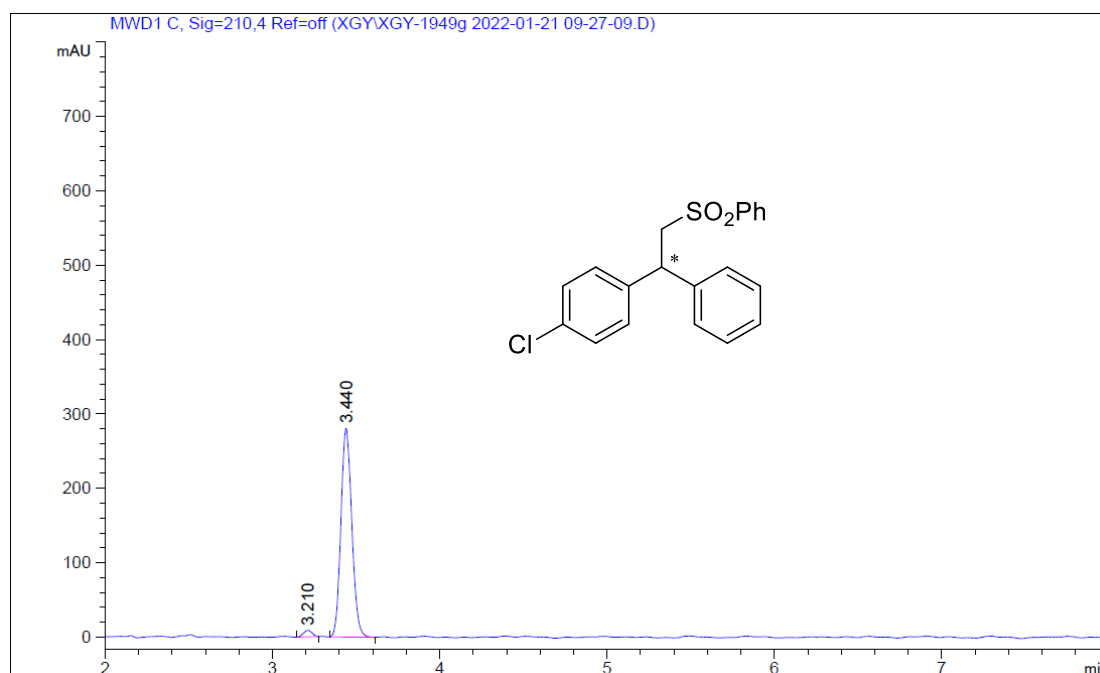

Signal 1: MWD1 C, Sig=210,4 Ref=off

| Peak # | RetTime [min] | Type | Width [min] | Area [mAU*s] | Height [mAU] | Area %  |
|--------|---------------|------|-------------|--------------|--------------|---------|
| 1      | 3.210         | BB   | 0.0540      | 32.31395     | 8.76984      | 2.4747  |
| 2      | 3.440         | BB   | 0.0709      | 1273.44043   | 280.76254    | 97.5253 |

# 1-Methyl-2-(1-phenyl-2-(phenylsulfonyl)ethyl)benzene (**4d**)

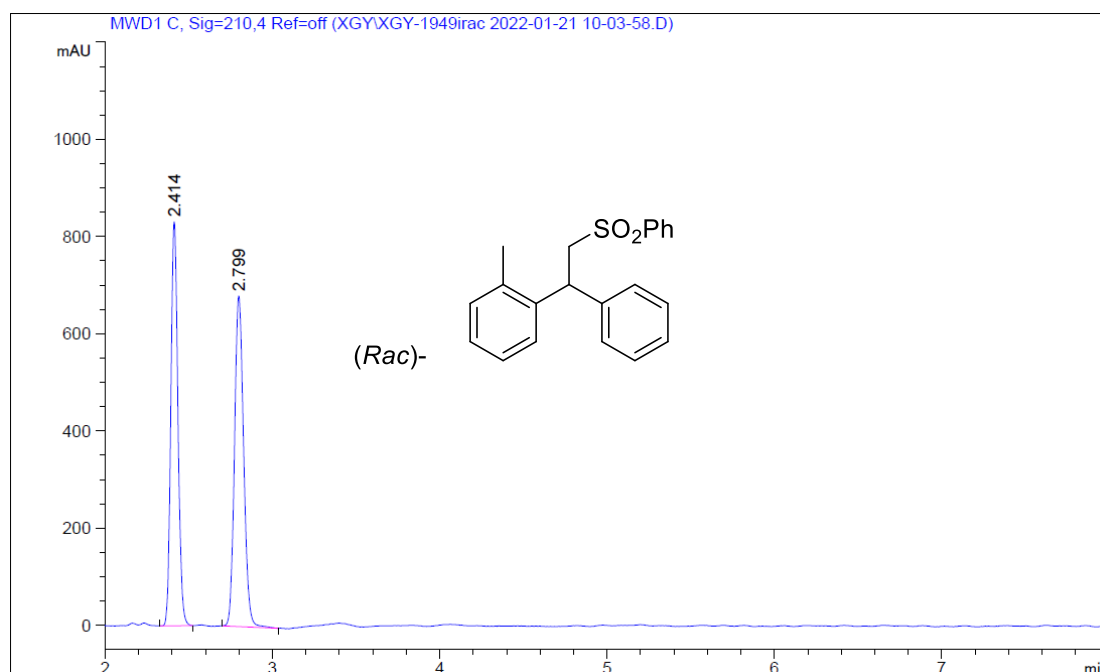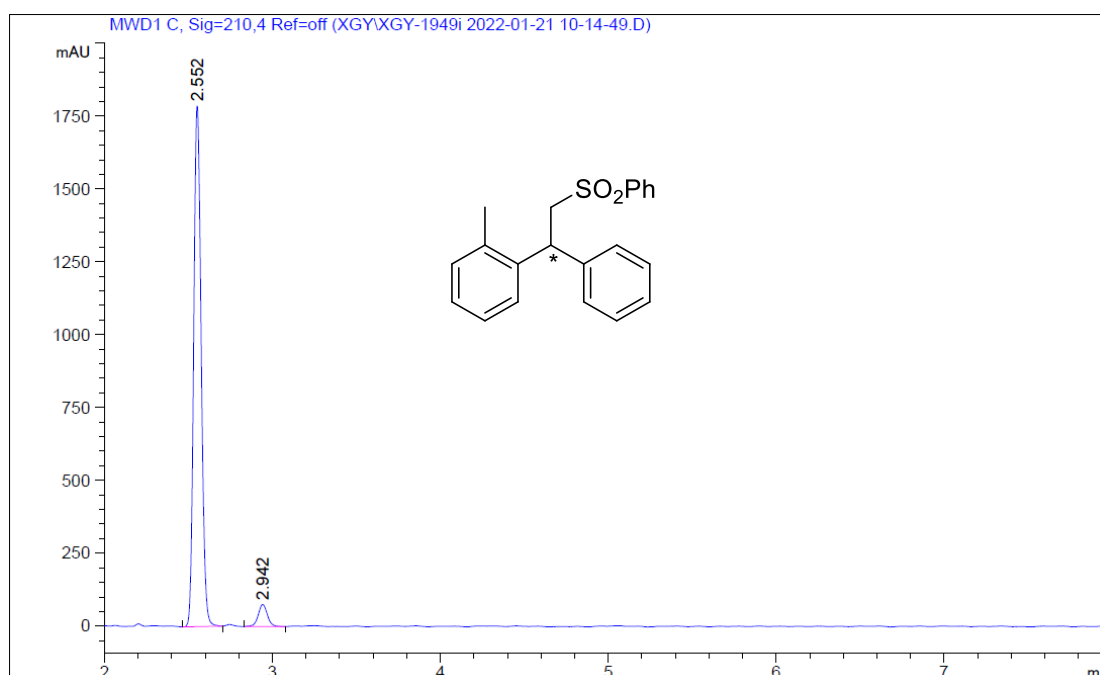

Signal 1: MWD1 C, Sig=210,4 Ref=off

| Peak # | RetTime [min] | Type | Width [min] | Area [mAU*s] | Height [mAU] | Area %  |
|--------|---------------|------|-------------|--------------|--------------|---------|
| 1      | 2.552         | BB   | 0.0480      | 5513.82666   | 1787.08691   | 95.0071 |
| 2      | 2.942         | BB   | 0.0591      | 289.76743    | 75.85313     | 4.9929  |

# 1-Methyl-3-(1-phenyl-2-(phenylsulfonyl)ethyl)benzene (**4e**)

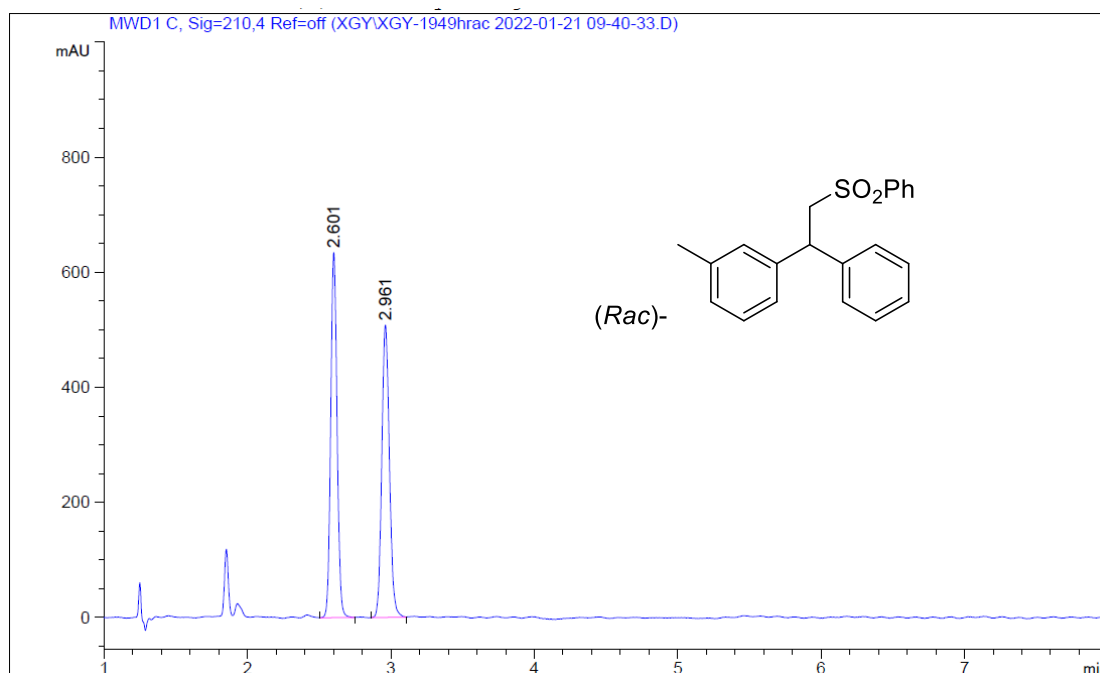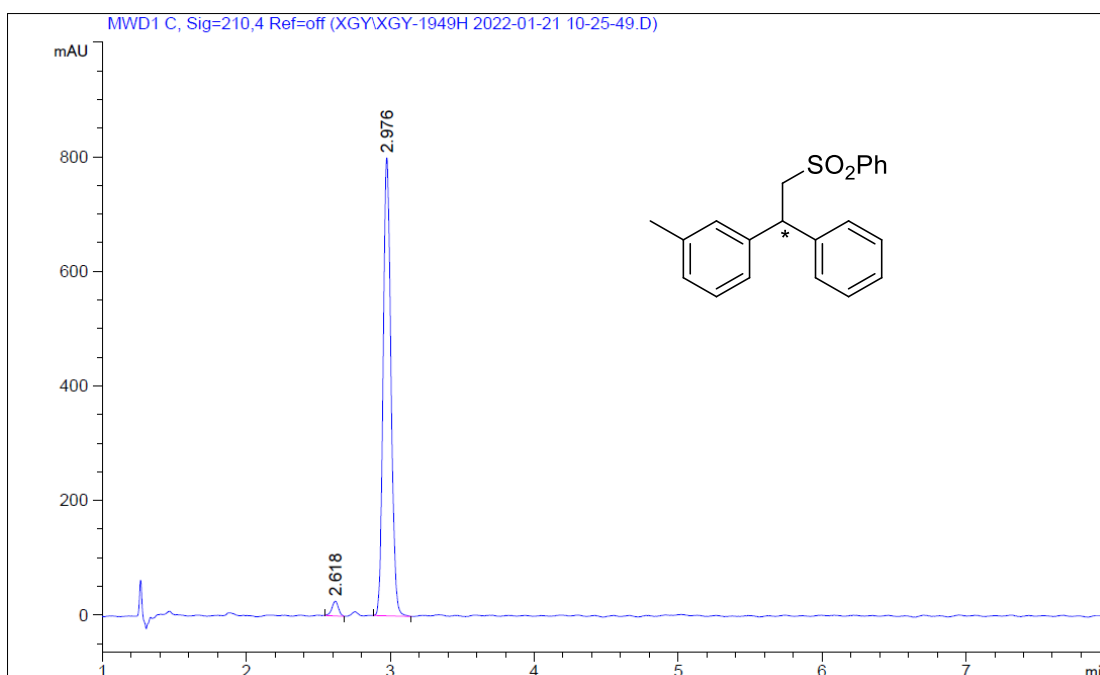

Signal 1: MWD1 C, Sig=210,4 Ref=off

| Peak # | RetTime [min] | Type | Width [min] | Area [mAU*s] | Height [mAU] | Area %  |
|--------|---------------|------|-------------|--------------|--------------|---------|
| 1      | 2.618         | BB   | 0.0477      | 80.98259     | 25.76103     | 2.6166  |
| 2      | 2.976         | BB   | 0.0585      | 3014.02026   | 799.62219    | 97.3834 |

# 1-Methyl-4-(1-phenyl-2-(phenylsulfonyl)ethyl)benzene (4f)

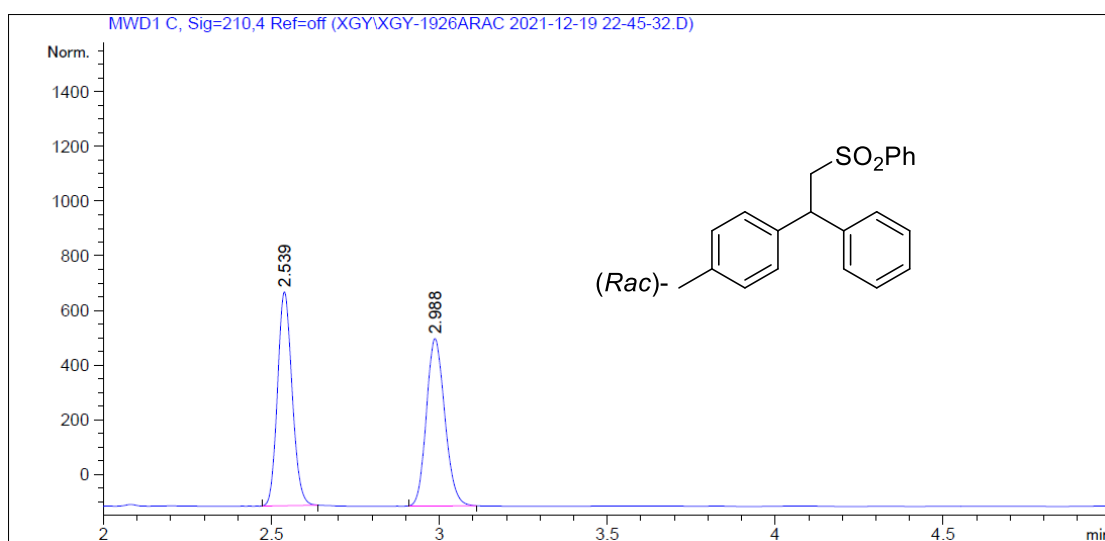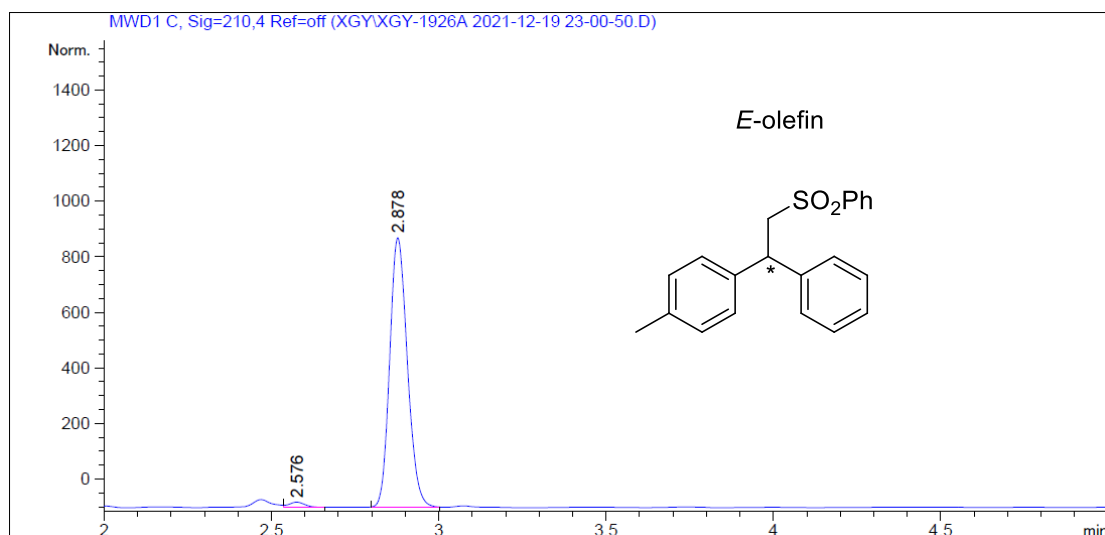

Signal 1: MWD1 C, Sig=210,4 Ref=off

| Peak # | RetTime [min] | Type | Width [min] | Area [mAU*s] | Height [mAU] | Area %  |
|--------|---------------|------|-------------|--------------|--------------|---------|
| 1      | 2.576         | VB   | 0.0493      | 46.37800     | 14.32139     | 1.6351  |
| 2      | 2.878         | BB   | 0.0567      | 2790.09741   | 761.91626    | 98.3649 |



Additional Info : Peak(s) manually integrated

MWD1 C, Sig=210,4 Ref=off (WXX\WXX-15-74-B-RAC-SO2Ph 2024-02-29 20-56-38.D)

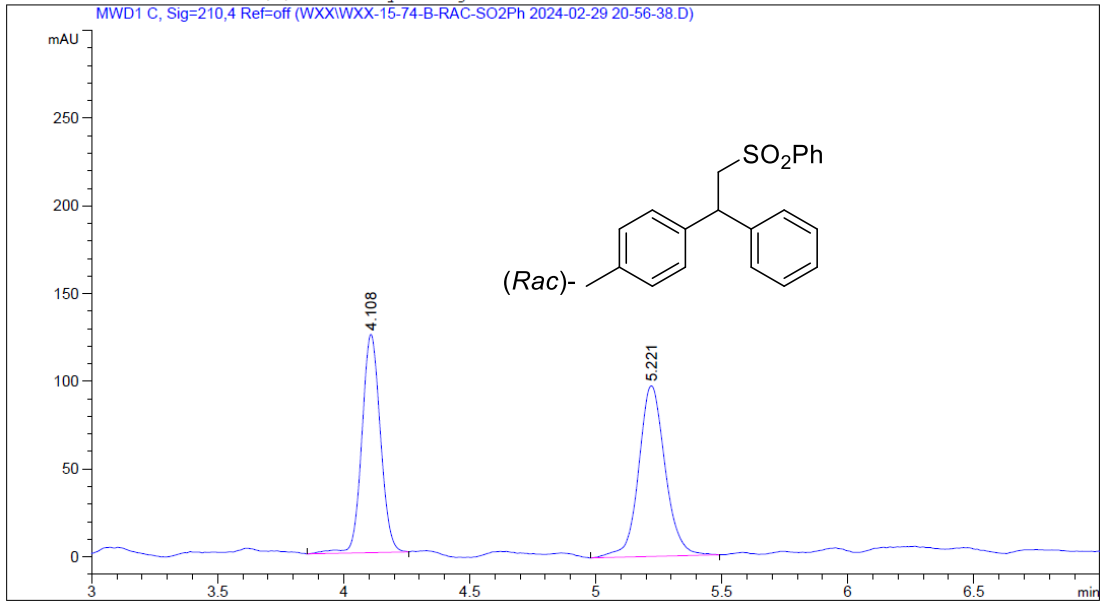

Additional Info : Peak(s) manually integrated

MWD1 C, Sig=210,4 Ref=off (WXX\WXX-15-70-D-SO2Ph 2024-02-29 21-06-39.D)

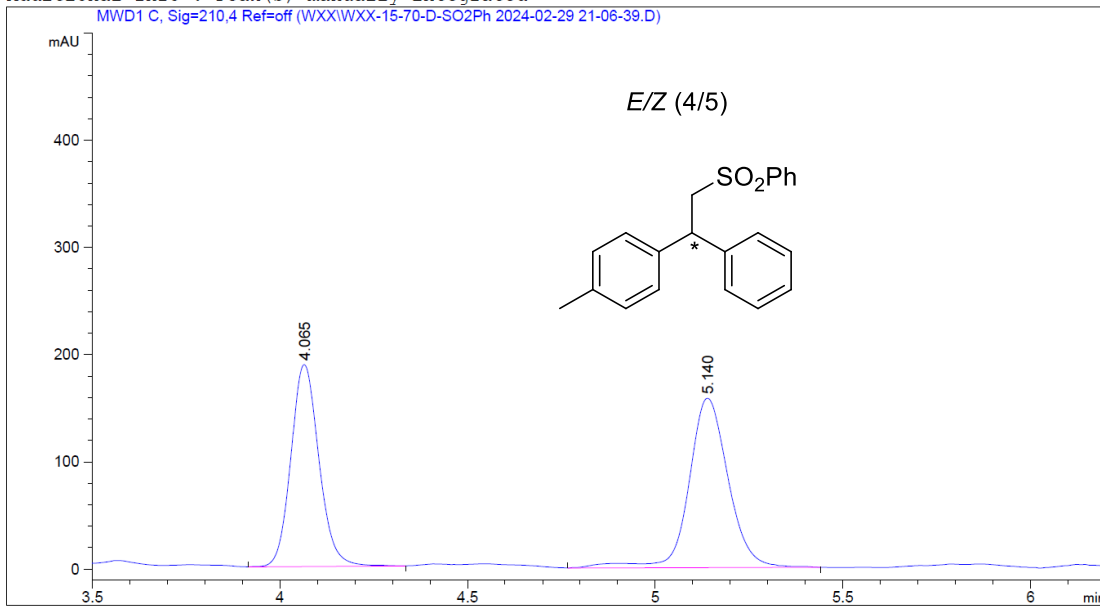

| Peak # | RetTime [min] | Type | Width [min] | Area [mAU*s] | Height [mAU] | Area %  |
|--------|---------------|------|-------------|--------------|--------------|---------|
| 1      | 4.065         | BV R | 0.0803      | 982.20819    | 188.52686    | 45.8732 |
| 2      | 5.140         | VV R | 0.1126      | 1158.92908   | 157.96118    | 54.1268 |

Totals : 2141.13727 346.48804

# 1,2-Dichloro-4-(1-phenyl-2-(phenylsulfonyl)ethyl)benzene (**4g**)

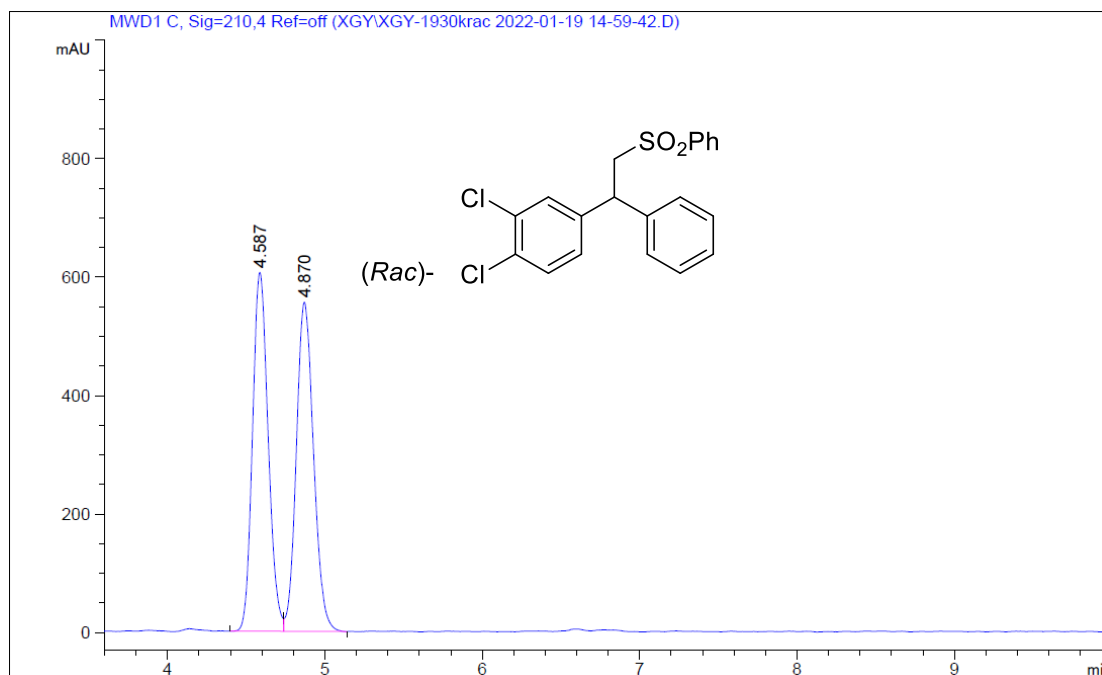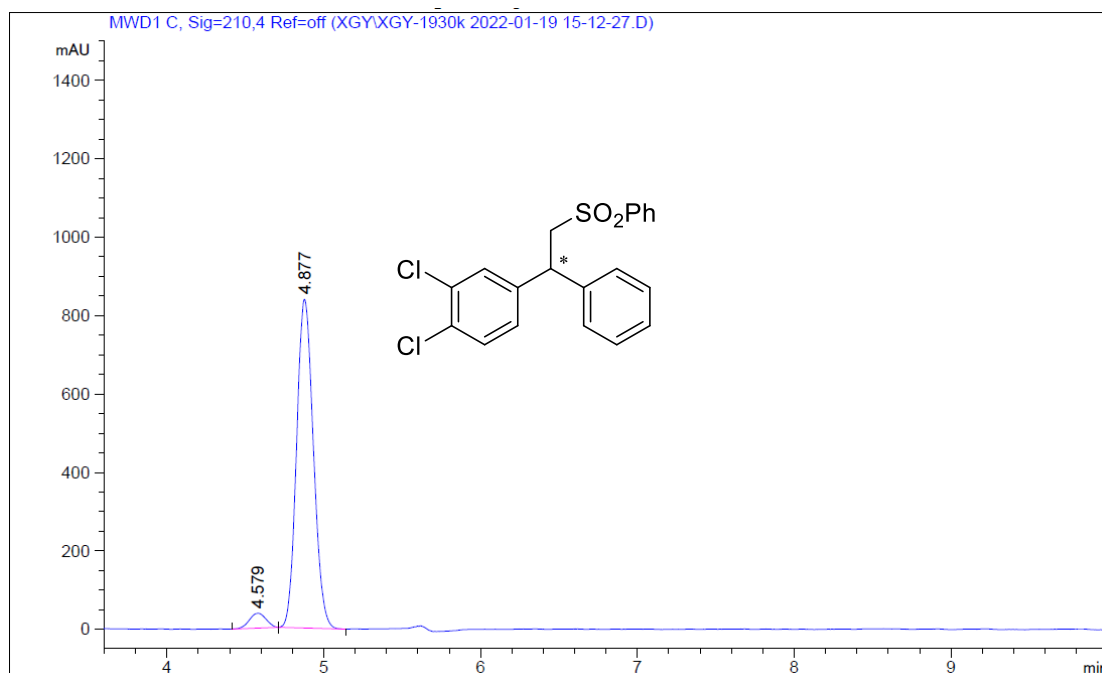

Signal 1: MWD1 C, Sig=210,4 Ref=off

| Peak # | RetTime [min] | Type | Width [min] | Area [mAU*s] | Height [mAU] | Area %  |
|--------|---------------|------|-------------|--------------|--------------|---------|
| 1      | 4.579         | BB   | 0.1106      | 281.28049    | 38.32268     | 4.3048  |
| 2      | 4.877         | BB   | 0.1165      | 6252.83057   | 838.26489    | 95.6952 |

1,3-Dimethyl-5-(1-phenyl-2-(phenylsulfonyl)ethyl)benzene (**4h**)

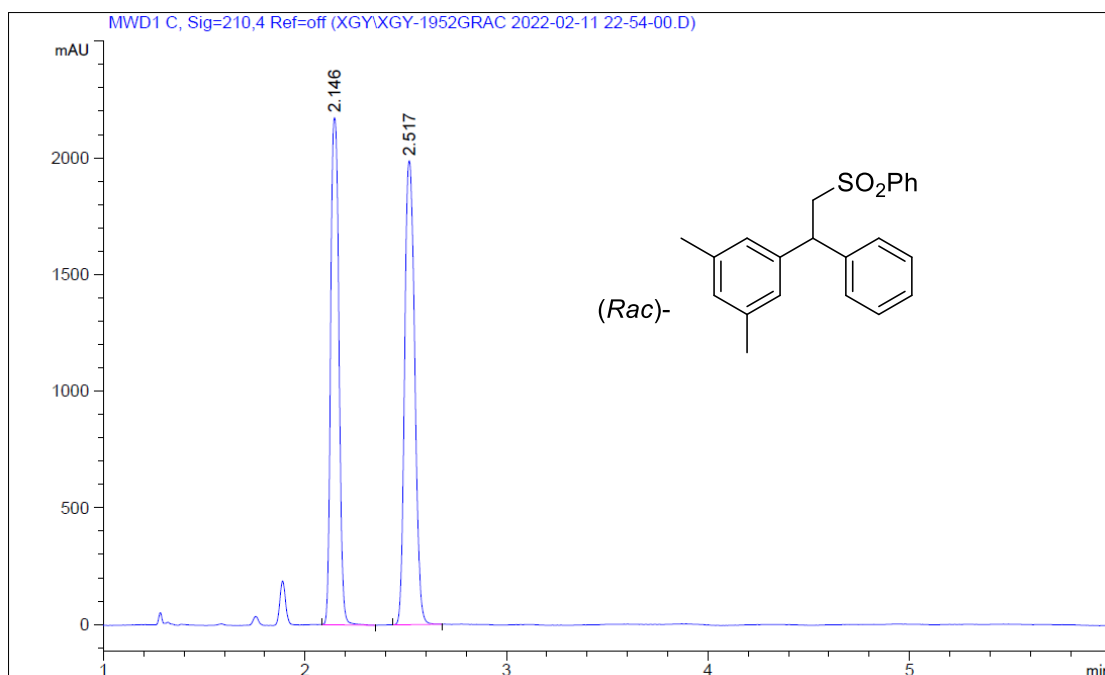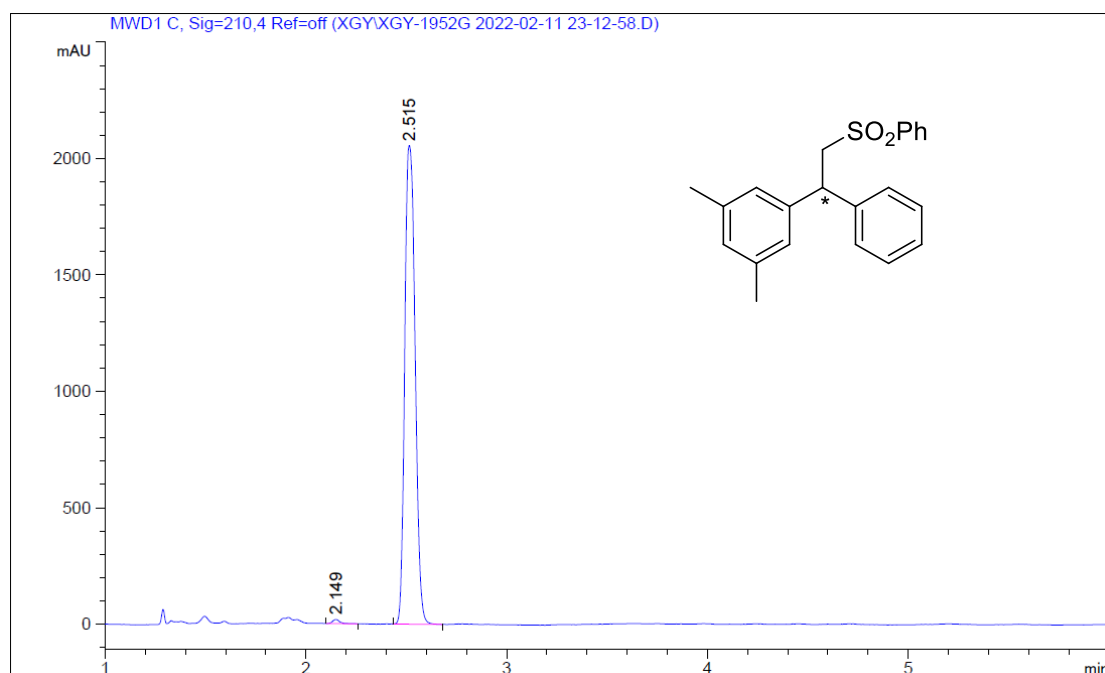

Signal 1: MWD1 C, Sig=210,4 Ref=off

| Peak # | RetTime [min] | Type | Width [min] | Area [mAU*s] | Height [mAU] | Area %  |
|--------|---------------|------|-------------|--------------|--------------|---------|
| 1      | 2.149         | BB   | 0.0394      | 45.01714     | 17.54111     | 0.6071  |
| 2      | 2.515         | BB   | 0.0568      | 7370.02051   | 2056.44751   | 99.3929 |

1-Chloro-4-(2-(phenylsulfonyl)-1-(*p*-tolyl)ethyl)benzene (**4i**)

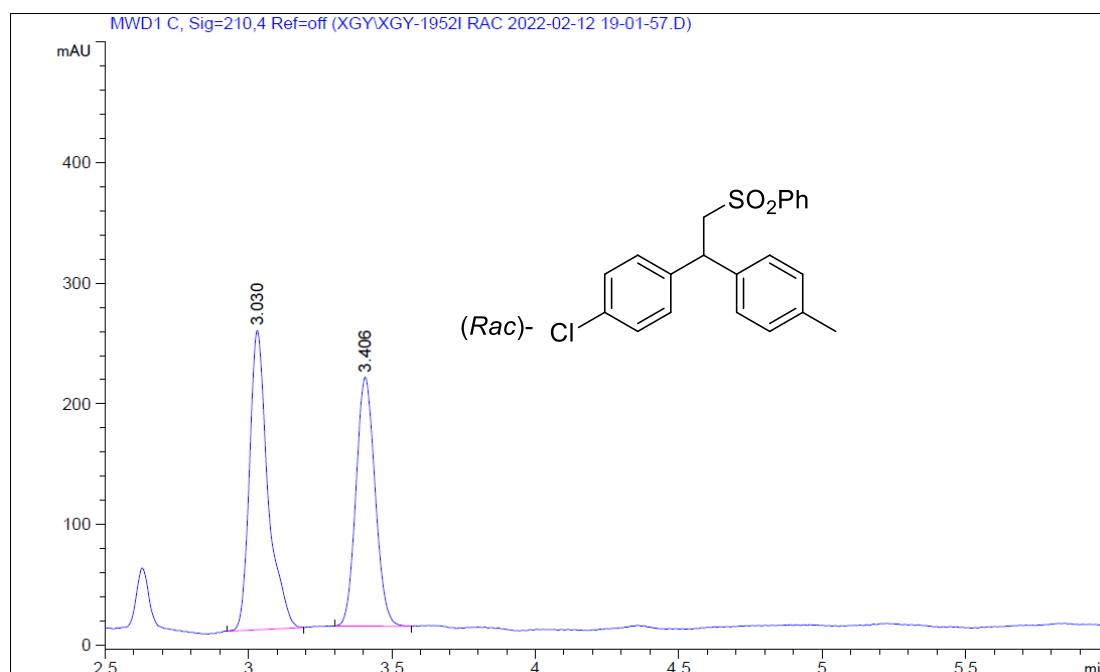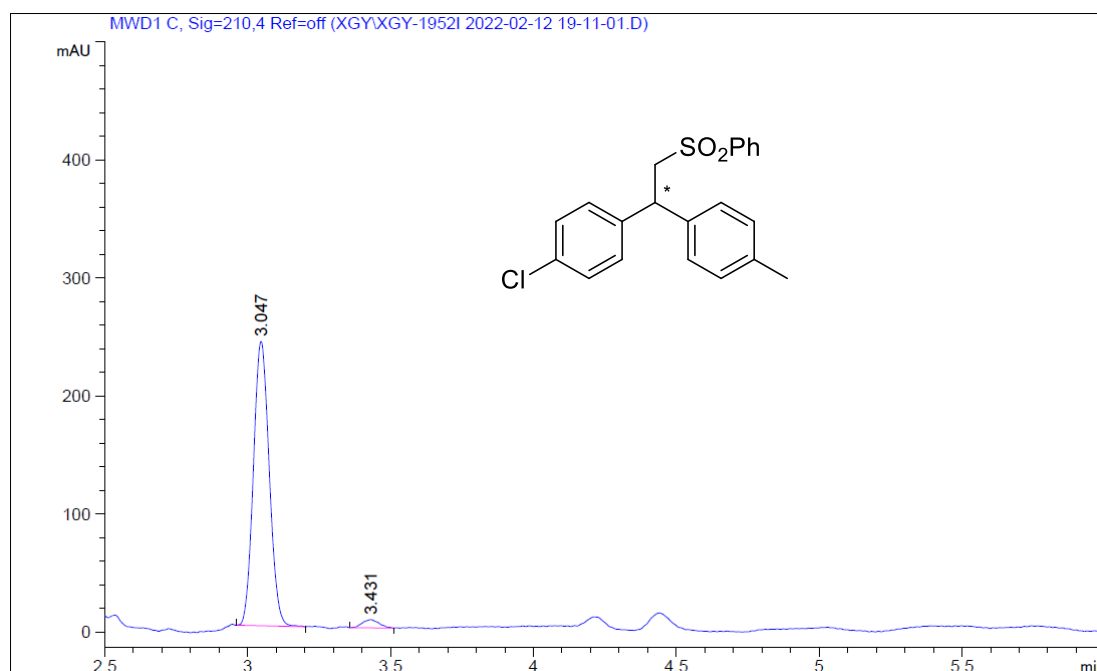

Signal 1: MWD1 C, Sig=210,4 Ref=off

| Peak # | RetTime [min] | Type | Width [min] | Area [mAU*s] | Height [mAU] | Area %  |
|--------|---------------|------|-------------|--------------|--------------|---------|
| 1      | 3.047         | BB   | 0.0599      | 927.22400    | 240.98590    | 97.0106 |
| 2      | 3.431         | BB   | 0.0522      | 28.57242     | 7.06819      | 2.9894  |

# 1-Fluoro-4-(2-(phenylsulfonyl)-1-(*p*-tolyl)ethyl)benzene (**4j**)

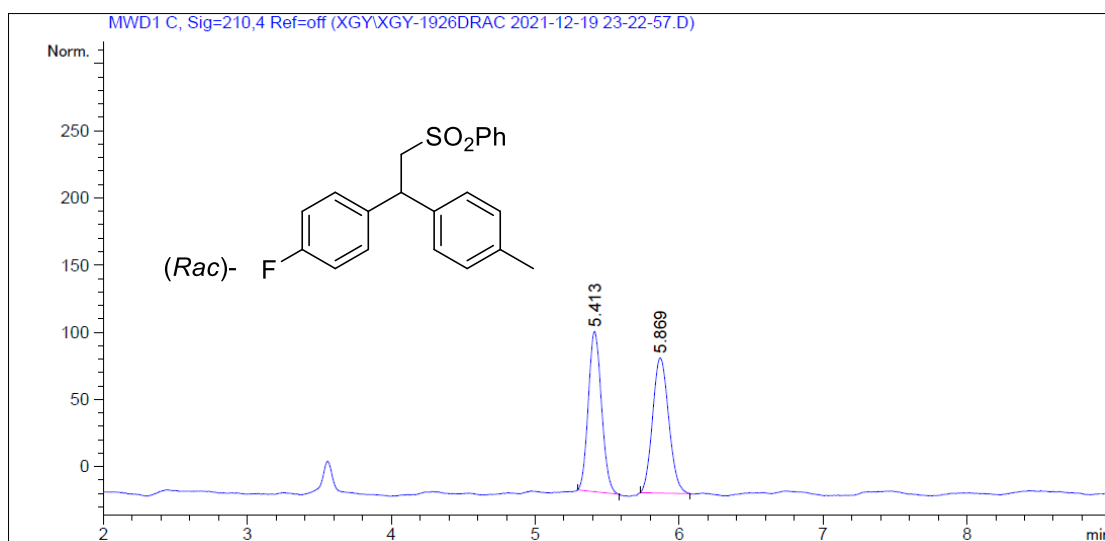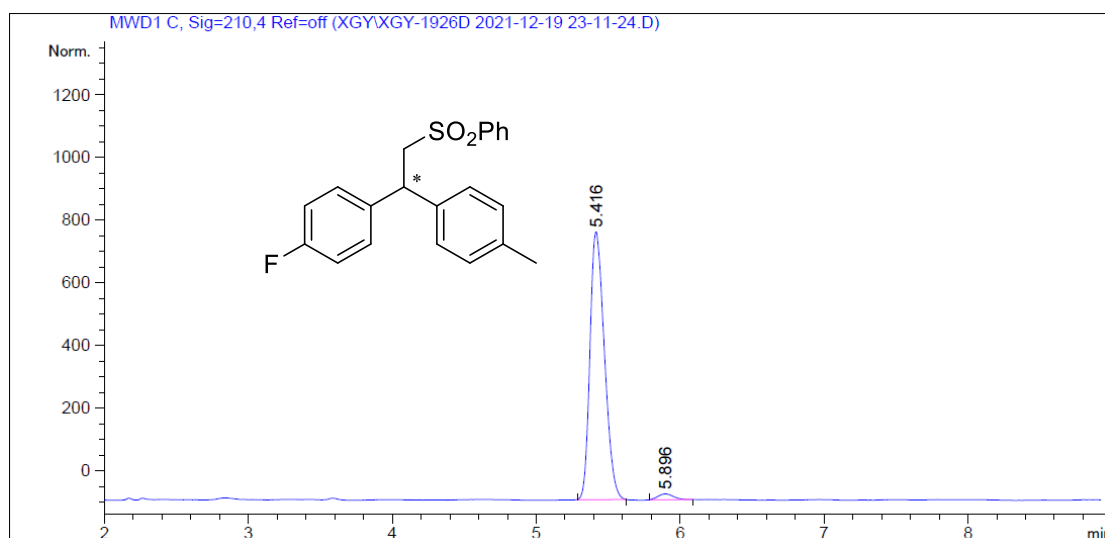

Signal 1: MWD1 C, Sig=210,4 Ref=off

| Peak # | RetTime [min] | Type | Width [min] | Area [mAU*s] | Height [mAU] | Area %  |
|--------|---------------|------|-------------|--------------|--------------|---------|
| 1      | 5.416         | BB   | 0.1096      | 4663.15771   | 667.00916    | 97.7510 |
| 2      | 5.896         | BB   | 0.0961      | 107.28853    | 14.53341     | 2.2490  |

1-Methyl-3-(2-(phenylsulfonyl)-1-(*p*-tolyl)ethyl)benzene (**4k**)

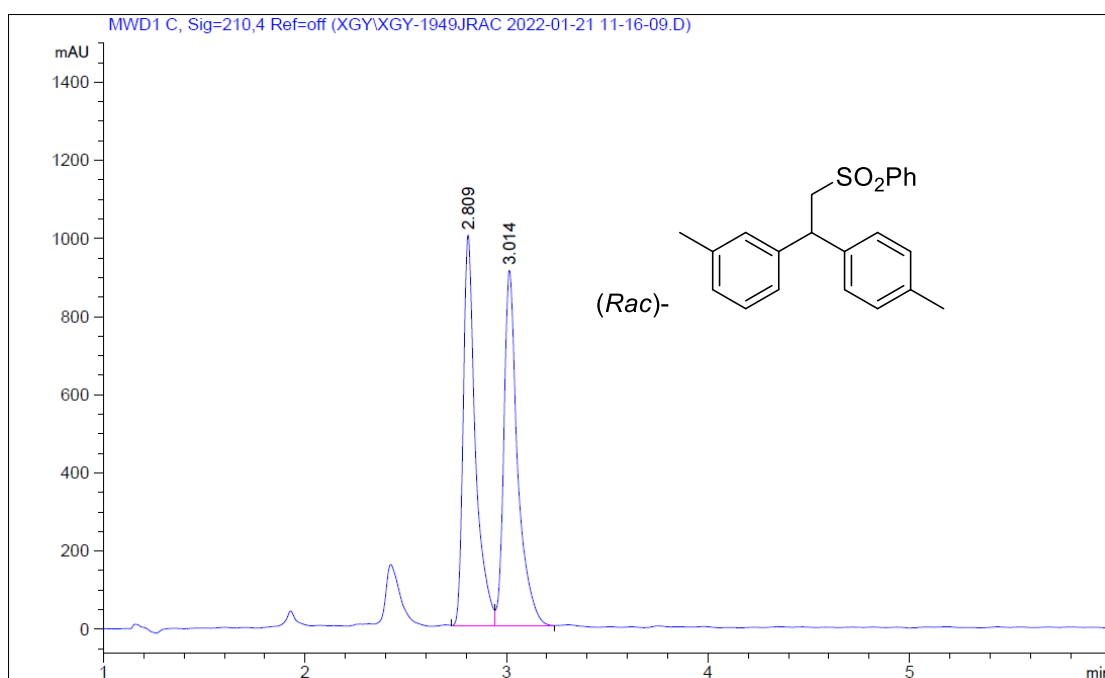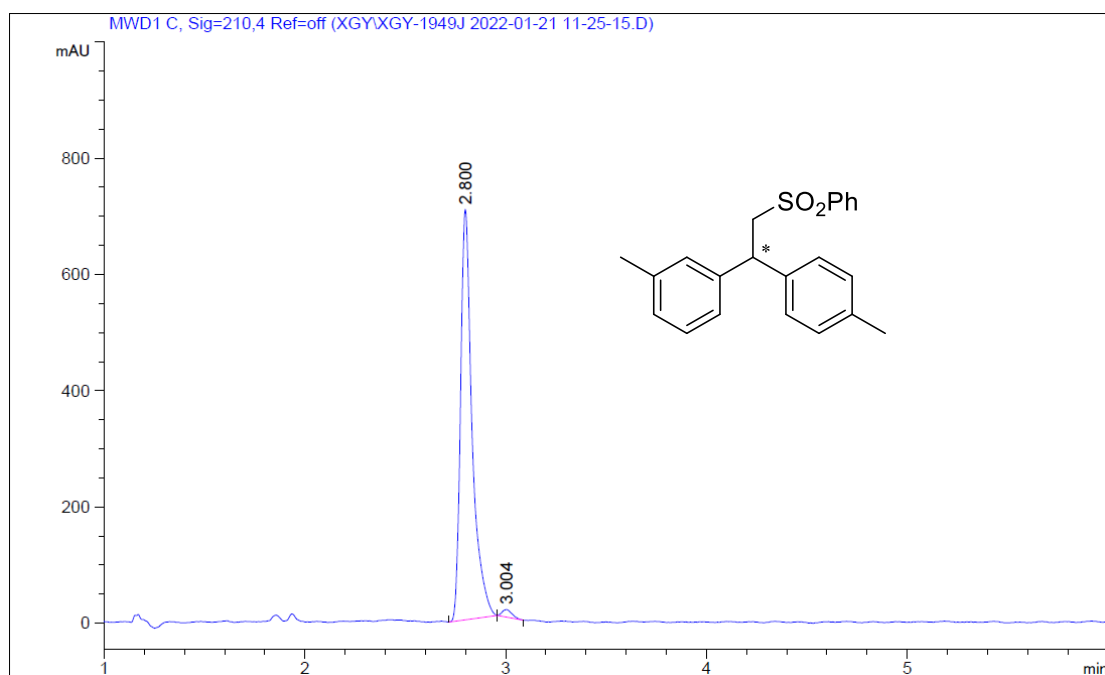

Signal 1: MWD1 C, Sig=210,4 Ref=off

| Peak # | RetTime [min] | Type | Width [min] | Area [mAU*s] | Height [mAU] | Area %  |
|--------|---------------|------|-------------|--------------|--------------|---------|
| 1      | 2.800         | BB   | 0.0591      | 2822.07251   | 706.34753    | 98.4496 |
| 2      | 3.004         | BB   | 0.0511      | 44.44292     | 12.92914     | 1.5504  |

# 1-Fluoro-3-(2-(phenylsulfonyl)-1-(*m*-tolyl)ethyl)benzene (**4I**)

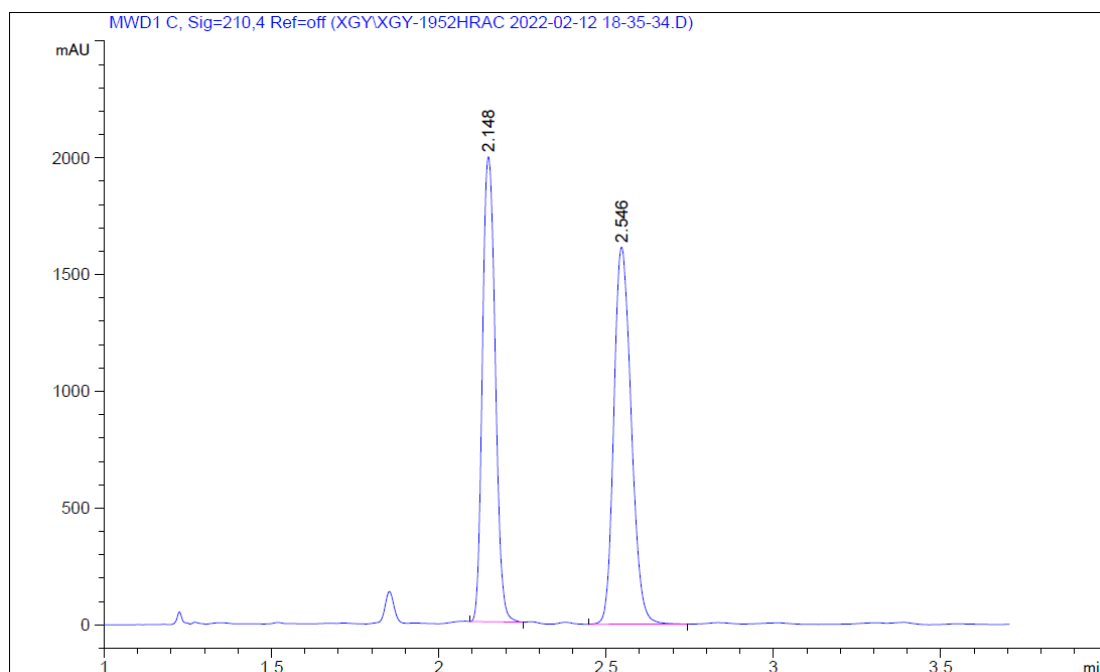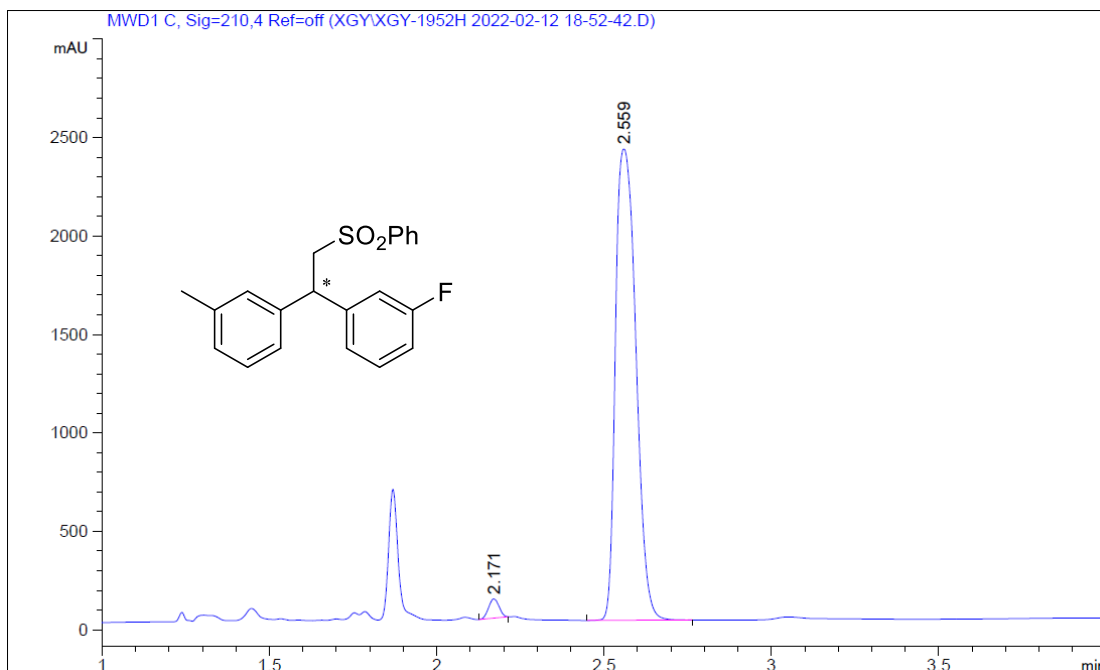

Signal 1: MWD1 C, Sig=210,4 Ref=off

| Peak # | RetTime [min] | Type | Width [min] | Area [mAU*s] | Height [mAU] | Area %  |
|--------|---------------|------|-------------|--------------|--------------|---------|
| 1      | 2.171         | BB   | 0.0338      | 212.57639    | 98.08105     | 2.0557  |
| 2      | 2.559         | BB   | 0.0679      | 1.01281e4    | 2393.42065   | 97.9443 |

### 3-(1-Phenyl-2-(phenylsulfonyl)ethyl)pyridine (**4m**)

Additional Info : Peak(s) manually integrated

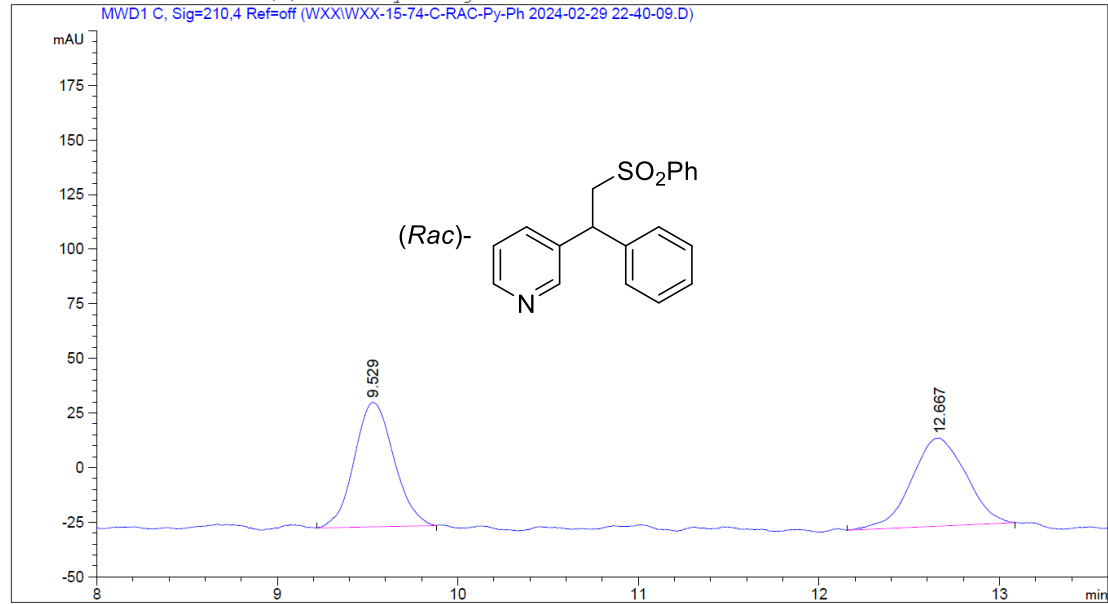

Additional Info : Peak(s) manually integrated

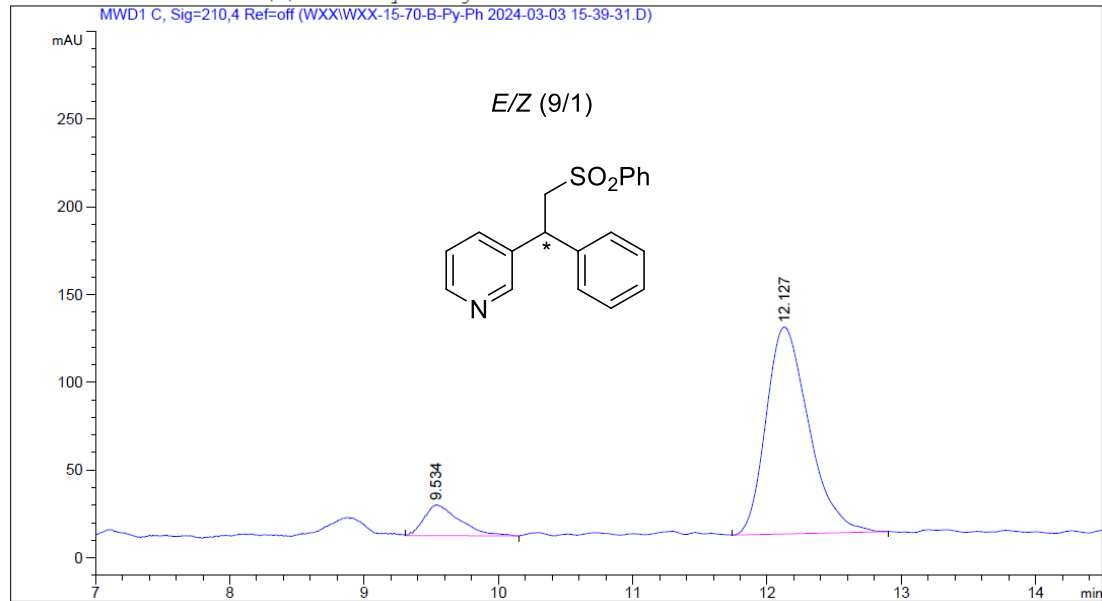

| Peak # | RetTime [min] | Type | Width [min] | Area [mAU*s] | Height [mAU] | Area %  |
|--------|---------------|------|-------------|--------------|--------------|---------|
| 1      | 9.534         | VB R | 0.2178      | 323.61502    | 17.57754     | 11.0413 |
| 2      | 12.127        | BV R | 0.2829      | 2607.32568   | 117.96249    | 88.9587 |

Totals : 2930.94070 135.54003



# 1-Methyl-4-(2-(methylsulfonyl)-1-phenylethyl)benzene (4n)

Additional Info : Peak(s) manually integrated

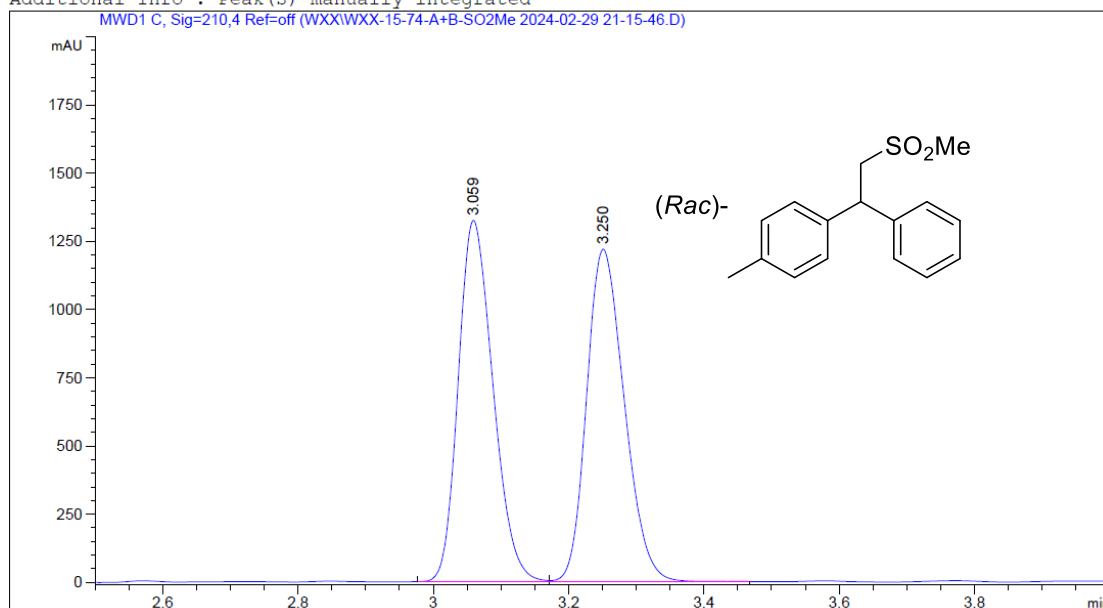

Additional Info : Peak(s) manually integrated

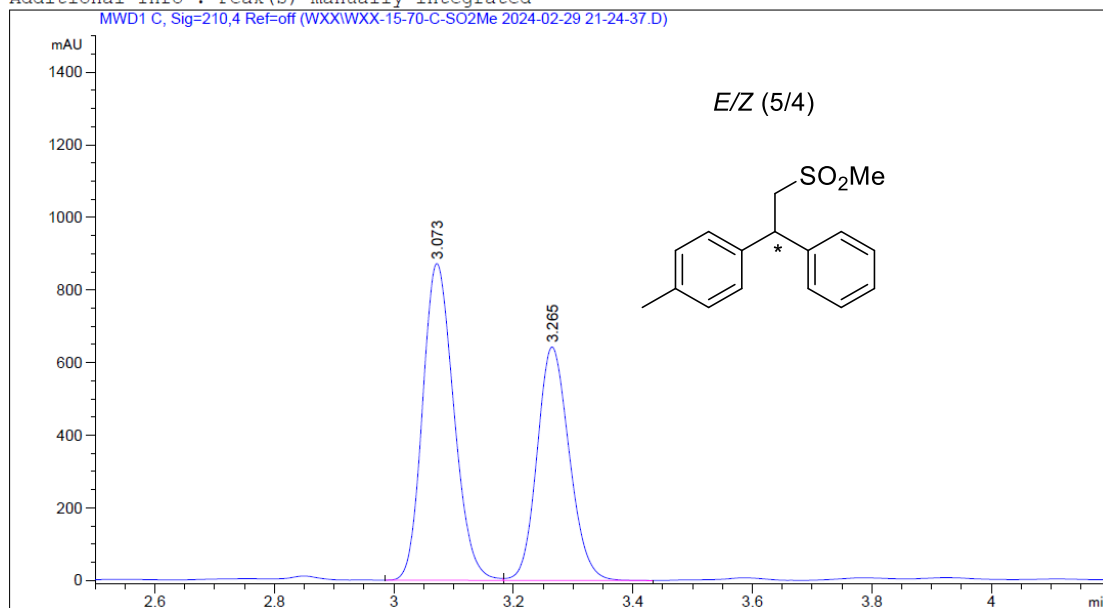

| Peak # | RetTime [min] | Type | Width [min] | Area [mAU*s] | Height [mAU] | Area %  |
|--------|---------------|------|-------------|--------------|--------------|---------|
| 1      | 3.073         | BV   | 0.0563      | 3163.39990   | 872.72650    | 56.7655 |
| 2      | 3.265         | VB   | 0.0582      | 2409.35107   | 643.03876    | 43.2345 |

Totals : 5572.75098 1515.76526
